# Supplementary material for: Self-catalytic photochemical sulfonylation of phenothiazines
Source: Royal Society of Chemistry journal article supplement (doi:10.1039/d3gc00889d), 2023-01-01

## SUPPORTING INFORMATION

### Self-catalytic photochemical sulfonylation of phenothiazines

Jige Liu,<sup>‡a</sup> Huiying Liu,<sup>‡a</sup> Xing Guo,<sup>‡a</sup> Ziqiang Wang,<sup>a</sup> Xinxin Wu,<sup>a</sup> Jie Li,<sup>a</sup> and Chen  
Zhu\*<sup>a,b</sup>

<sup>a</sup>Key Laboratory of Organic Synthesis of Jiangsu Province, College of Chemistry, Chemical Engineering and Materials Science, Soochow University, 199 Ren-Ai Road, Suzhou, Jiangsu 215123, China.

<sup>b</sup>Frontiers Science Center for Transformative Molecules and Shanghai Key Laboratory for Molecular Engineering of Chiral Drugs, Shanghai Jiao Tong University, 800 Dongchuan Road, Shanghai 200240, China.

<sup>‡</sup> These authors contributed equally.

Email: [chzhu@sjtu.edu.cn](mailto:chzhu@sjtu.edu.cn)

### Contents

|                                                                                          |     |
|------------------------------------------------------------------------------------------|-----|
| 1. General experimental details.....                                                     | S2  |
| 2. General procedures for mono/di-sulfonylation of phenothiazines .....                  | S2  |
| 3. Characterization of new compounds .....                                               | S3  |
| 4. Light on/off experiments .....                                                        | S18 |
| 5. UV-Vis absorption and photoluminescence spectroscopy of <b>3a</b> and <b>4a</b> ..... | S18 |
| 6. Mechanistic experiments .....                                                         | S20 |
| 7. NMR spectra .....                                                                     | S26 |

## 1. General experimental details

All reactions were maintained under a nitrogen atmosphere unless otherwise stated. Commercially available reagents were used without further purification. Infrared (FT-IR) spectra were recorded on a BRUKER VERTEX 70,  $\nu_{\text{max}}$  in  $\text{cm}^{-1}$ .  $^1\text{H-NMR}$  spectra were recorded on a BRUKER AVANCE III HD (400 MHz) spectrometer. Chemical shifts are reported in ppm from tetramethylsilane with the solvent resonance as internal standard ( $\text{CDCl}_3$ :  $\delta$  7.26). Data are reported as follows: chemical shift, multiplicity (s = singlet, d = doublet, t = triplet, q = quadruplet, br = broad, m = multiplet), coupling constants (Hz) and integration.  $^{13}\text{C-NMR}$  spectra were recorded on a BRUKER AVANCE III HD (100 MHz) spectrometer with complete proton decoupling. Chemical shifts are reported in ppm from tetramethylsilane with the solvent resonance as the internal standard ( $\text{CDCl}_3$ :  $\delta$  77.16).  $^{19}\text{F-NMR}$  spectra were recorded on a BRUKER AVANCE III HD (377 MHz) spectrometer. Mass spectra were measured with an Agilent Technologies 6120 Quadrupole LC/MS. High resolution mass spectrometry (HRMS) were measured with a GCT Premier<sup>TM</sup> and BRUKER micrOTF-Q III. Melting points were measured using INESA WRR and values are uncorrected. Flash column chromatography was performed using 300-400 mesh silica gel with the indicated solvent system.

## 2. General procedures for mono/di-sulfonylation of phenothiazines

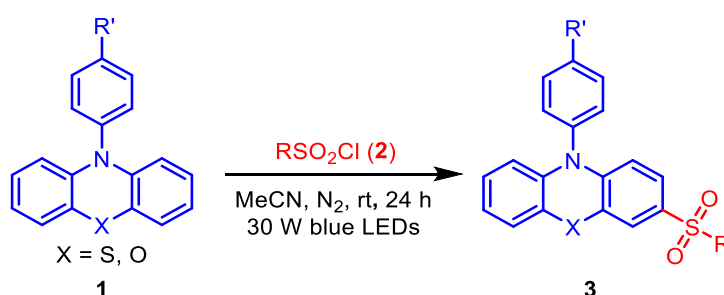

*Mono-sulfonylation of phenothiazines:* PTH (0.2 mmol, 55.1 mg) and  $\text{RSO}_2\text{Cl}$  (0.2 mmol) were loaded in a flask, which was subjected to evacuation/flushing with  $\text{N}_2$  for 3 times. MeCN (1.0 mL) was added to the mixture via syringe, which was irradiated by 30 W blue LEDs (450 nm wavelength) and stirred at rt for 24 h. The mixture was concentrated in vacuo, and purified by flash column chromatography on silica gel (eluent: ethyl acetate/petroleum ether) to give the corresponding products.

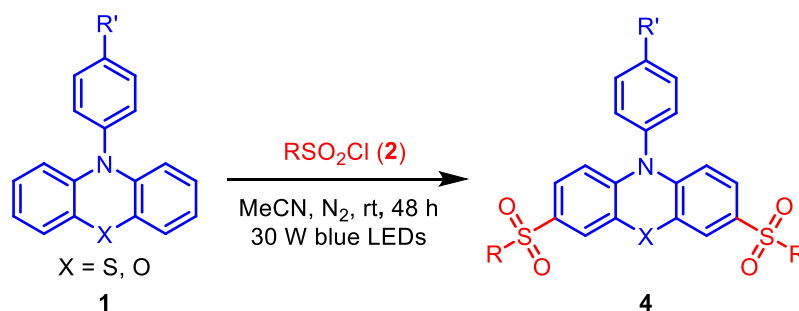

*Di-sulfonylation of phenothiazines:* PTH (0.2 mmol, 55.1 mg), RSO<sub>2</sub>Cl (0.8 mmol) were loaded in a flask, which was subjected to evacuation/ flushing with N<sub>2</sub> for 3 times. MeCN (1.0 mL) was added to the mixture via syringe, which was irradiated by 30 W blue LEDs (450 nm wavelength) and stirred at rt for 48 h. The mixture was concentrated in vacuo, and purified by flash column chromatography on silica gel (eluent: ethyl acetate/petroleum ether) to give the corresponding products.

### 3. Characterization of new compounds

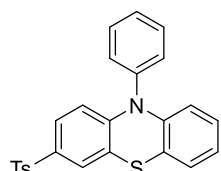

**3a:** 89% yield, 76.3 mg, yellow solid, m.p. 88-89 °C. Purification by flash column chromatography (eluent: EtOAc/Petroleum ether = 1/10). <sup>1</sup>H NMR (400 MHz, CDCl<sub>3</sub>) δ 7.74 (d, *J* = 8.0 Hz, 2H), 7.66-7.56 (m, 2H), 7.54-7.48 (m, 1H), 7.48-7.44 (m, 1H) 7.35-7.29 (m, 3H), 7.26-7.22 (m, 2H) 6.95-6.89 (m, 1H), 6.85-6.77 (m, 2H), 6.15-6.04 (m, 2H), 2.37 (s, 3H); <sup>13</sup>C NMR (100 MHz, CDCl<sub>3</sub>) δ 148.2, 143.9, 142.8, 139.8, 139.2, 134.8, 131.2, 130.7, 129.9, 129.1, 127.4, 127.3, 126.8, 126.7, 125.7, 123.7, 120.7, 118.7, 116.4, 115.1, 21.6. FT-IR: ν (cm<sup>-1</sup>) 3061, 2920, 1585, 1458, 1258, 1018, 987, 937. HRMS [ESI] calcd for C<sub>25</sub>H<sub>19</sub>NNaO<sub>2</sub>S<sub>2</sub><sup>+</sup> [M+Na]<sup>+</sup> 452.0749, found 452.0745.

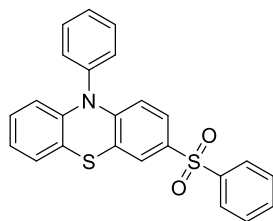

**3b:** 96% yield, 79.7 mg, yellow solid, m.p. 94-95 °C. Purification by flash column chromatography (eluent: EtOAc/Petroleum ether = 1/20). <sup>1</sup>H NMR (400 MHz, CDCl<sub>3</sub>) δ 7.91-7.84 (m, 2H), 7.66-7.58 (m, 2H), 7.56-7.43 (m, 5H), 7.37-7.31 (m, 3H), 6.98-6.91 (m, 1H), 6.86-6.77 (m, 2H), 6.15-6.06 (m, 2H); <sup>13</sup>C NMR (100 MHz, CDCl<sub>3</sub>) δ 148.4, 142.7, 142.2, 139.7, 134.3, 132.9, 131.2, 130.7, 129.2, 129.1, 127.3, 127.3, 127.0, 126.7, 125.8, 123.7, 120.8, 118.7, 116.4, 115.1. FT-IR: ν (cm<sup>-1</sup>) 3060, 2920, 2850, 1585, 1485, 1315, 1258, 811, 726, 686. HRMS [ESI] calcd for C<sub>24</sub>H<sub>17</sub>NNaO<sub>2</sub>S<sub>2</sub><sup>+</sup> [M+Na]<sup>+</sup> 438.0593, found 438.0591.

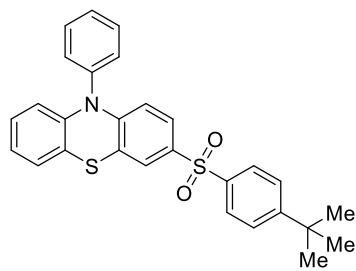

**3c:** 80% yield, 75.3 mg, yellow solid, m.p. 258-259 °C. Purification by flash column chromatography (eluent: EtOAc/Petroleum ether = 1/30-1/10). <sup>1</sup>H NMR (400 MHz, CDCl<sub>3</sub>) δ 7.81-7.76 (m, 2H), 7.64-7.59 (m, 2H), 7.55-7.50 (m, 1H), 7.50-7.47 (m, 2H), 7.47-7.44 (m, 1H), 7.36-7.30 (m, 3H), 6.97-6.92 (m, 1H), 6.85-6.79 (m, 2H), 6.12 (d, *J* = 8.8 Hz, 1H), 6.11-6.07 (m, 1H), 1.30 (s, 9H); <sup>13</sup>C NMR (100 MHz, CDCl<sub>3</sub>) δ 156.8, 148.2, 142.8, 139.8, 139.1, 134.7, 131.2, 130.7, 129.1, 127.3, 127.2, 126.9, 126.7, 126.3, 125.8, 123.7, 120.7, 118.7, 116.4, 115.1, 35.1, 31.0. FT-IR: ν (cm<sup>-1</sup>) 2954, 2861, 2257, 1927, 1586, 1561, 1390, 1322, 1247, 1157, 1121, 724, 663, 629. HRMS [ESI] calcd for C<sub>28</sub>H<sub>26</sub>NO<sub>2</sub>S<sub>2</sub><sup>+</sup> [M+H]<sup>+</sup> 472.1399, found 472.1390.

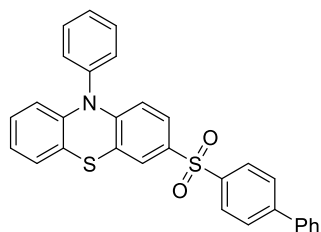

**3d:** 81% yield, 79.5 mg, yellow solid, m.p. 96-97 °C. Purification by flash column chromatography (eluent: EtOAc/Petroleum ether = 1/15-1/10). <sup>1</sup>H NMR (400 MHz, CDCl<sub>3</sub>) δ 7.94 (d, *J* = 8.4 Hz, 2H), 7.69-7.65 (m, 2H), 7.63-7.59 (m, 2H), 7.57-7.52 (m, 4H), 7.48-7.43 (m, 2H), 7.42-7.39 (m, 1H), 7.39-7.36 (m, 1H), 7.34-7.33 (m, 1H), 7.32-7.30 (m, 1H), 6.97-6.93 (m, 1H), 6.84-6.81 (m, 2H), 6.14 (d, *J* = 8.8 Hz, 1H), 6.12-6.09 (m, 1H); <sup>13</sup>C NMR (100 MHz, CDCl<sub>3</sub>) δ 148.4, 145.9, 142.7, 140.7, 139.7, 139.3, 134.5, 131.2, 130.7, 129.1, 129.1, 128.5, 127.9, 127.9, 127.4, 127.3, 127.0, 126.7, 125.8, 123.7, 120.8, 118.7, 116.4, 115.1. FT-IR: ν (cm<sup>-1</sup>) 3029, 2946, 1586, 1492, 1390, 1115, 902. HRMS [ESI] calcd for C<sub>30</sub>H<sub>22</sub>NO<sub>2</sub>S<sub>2</sub><sup>+</sup> [M+H]<sup>+</sup> 492.1086, found 492.1085.

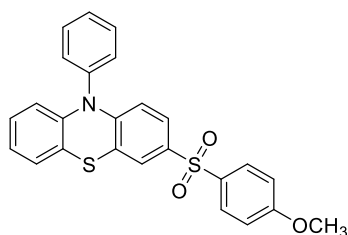

**3e:** 88% yield, 78.6 mg, yellow solid, m.p. 163-164 °C. Purification by flash column chromatography (eluent: EtOAc/Petroleum ether = 1/50). <sup>1</sup>H NMR (400 MHz, CDCl<sub>3</sub>) δ 7.82-7.76 (m, 2H), 7.65-7.58 (m, 2H), 7.54-7.48 (m, 1H), 7.46 (d, *J* = 2.4 Hz, 1H), 7.34-7.28 (m, 3H), 6.97-6.89 (m, 3H), 6.85-6.77 (m, 2H), 6.14-6.07 (m, 2H), 3.82 (s, 3H); <sup>13</sup>C NMR (100 MHz, CDCl<sub>3</sub>) δ 163.2, 148.1, 142.8, 139.8, 135.2, 133.7, 131.2, 130.7, 129.5, 129.1, 127.3, 126.7, 126.6, 125.5, 123.6, 120.7, 118.7, 116.3, 115.1, 114.5, 55.7. FT-IR: ν (cm<sup>-1</sup>) 3100, 2972, 2929, 2845, 1771, 1562, 1439, 1079, 835. HRMS [ESI] calcd for C<sub>25</sub>H<sub>20</sub>NO<sub>3</sub>S<sub>2</sub><sup>+</sup> [M+H]<sup>+</sup> 446.0879, found 446.0881

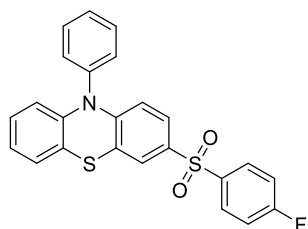

**3f:** 85% yield, 73.4 mg, yellow solid, m.p. 88-89 °C. Purification by flash column chromatography (eluent: EtOAc/Petroleum ether = 1/20). <sup>1</sup>H NMR (400 MHz, CDCl<sub>3</sub>) δ 7.92-7.84 (m, 2H), 7.66-7.58 (m, 2H), 7.56-7.49 (m, 1H), 7.46 (d, *J* = 2.0 Hz, 1H), 7.36-7.28 (m, 3H), 7.18-7.10 (m, 2H), 6.98-6.91 (m, 1H), 6.86-6.78 (m, 2H), 6.15-6.07 (m, 2H); <sup>13</sup>C NMR (100 MHz, CDCl<sub>3</sub>) δ 165.3 (d, *J*<sub>C-F</sub> = 253.8 Hz), 148.5, 142.7, 139.7, 138.3 (d, *J*<sub>C-F</sub> = 3.1 Hz), 134.1, 131.2, 130.7, 130.1 (d, *J*<sub>C-F</sub> = 9.4 Hz), 129.2, 127.4, 126.9, 126.7, 125.7, 123.8, 120.9, 118.6, 116.5 (d, *J*<sub>C-F</sub> = 18.6 Hz), 116.4, 115.1; <sup>19</sup>F NMR (377 MHz, CDCl<sub>3</sub>) δ -104.8 (s). FT-IR: ν (cm<sup>-1</sup>) 3061, 2922, 2851, 1586, 1491, 1258, 1077, 1024, 901, 813, 746, 650. HRMS [ESI] calcd for C<sub>24</sub>H<sub>17</sub>FNO<sub>2</sub>S<sub>2</sub><sup>+</sup> [M+H]<sup>+</sup> 434.0679, found 434.0674.

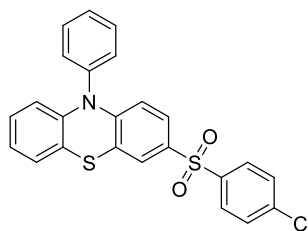

**3g:** 70% yield, 63.1 mg, yellow solid, m.p. 189-199 °C. Purification by flash column chromatography (eluent: EtOAc/Petroleum ether = 1/50). <sup>1</sup>H NMR (400 MHz, CDCl<sub>3</sub>) δ 7.83-7.77 (m, 2H), 7.66-7.58 (m, 2H), 7.56-7.49 (m, 1H), 7.48-7.41 (m, 3H), 7.35-7.28 (m, 3H), 6.97-6.89 (m, 1H), 6.86-6.78 (m, 2H), 6.14-6.05 (m, 2H); <sup>13</sup>C NMR (100 MHz, CDCl<sub>3</sub>) δ 148.6, 142.6, 140.7, 139.6, 139.5, 133.8, 131.2, 130.7, 129.5, 129.2, 128.8,

127.4, 127.0, 126.7, 125.7, 123.8, 120.9, 118.6, 116.4, 115.1. FT-IR:  $\nu$  ( $\text{cm}^{-1}$ ) 3057, 2924, 2853, 1584, 1491, 1461, 1440, 1309, 901, 751, 707, 633. HRMS [ESI] calcd for  $\text{C}_{24}\text{H}_{17}\text{ClNO}_2\text{S}_2^+$   $[\text{M}+\text{H}]^+$  450.0384, found 450.0391.

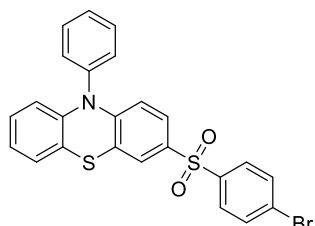

**3h:** 23% yield, 22.6 mg, yellow solid, m.p. 203-204 °C. Purification by flash column chromatography (eluent: EtOAc/Petroleum ether = 1/50).  $^1\text{H}$  NMR (400 MHz,  $\text{CDCl}_3$ )  $\delta$  7.74-7.70 (m, 2H), 7.65-7.58 (m, 4H), 7.56-7.50 (m, 1H), 7.45 (d,  $J = 2.0$  Hz, 1H), 7.34-7.28 (m, 3H), 6.97-6.93 (m, 1H), 6.85-6.79 (m, 2H), 6.13-6.06 (m, 2H);  $^{13}\text{C}$  NMR (100 MHz,  $\text{CDCl}_3$ )  $\delta$  148.6, 142.6, 141.3, 139.7, 133.7, 132.5, 131.2, 130.7, 129.2, 128.8, 128.1, 127.4, 127.0, 126.7, 125.7, 123.8, 120.9, 118.6, 116.4, 115.1. FT-IR:  $\nu$  ( $\text{cm}^{-1}$ ) 3056, 2920, 2851, 1562, 1490, 1440, 1388, 1308, 1245, 1150, 930, 902, 751, 724, 707. HRMS [ESI] calcd for  $\text{C}_{24}\text{H}_{17}\text{BrNO}_2\text{S}_2^+$   $[\text{M}+\text{H}]^+$  493.9879, found 493.9870.

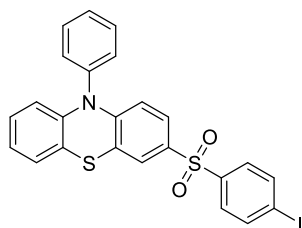

**3i:** 50% yield, 53.2 mg, yellow solid, m.p. 210-211 °C. Purification by flash column chromatography (eluent: EtOAc/Petroleum ether = 1/50).  $^1\text{H}$  NMR (400 MHz,  $\text{CDCl}_3$ )  $\delta$  7.84-7.77 (m, 2H), 7.66-7.59 (m, 2H), 7.59-7.55 (m, 2H), 7.54-7.49 (m, 1H), 7.47-7.43 (m, 1H), 7.35-7.27 (m, 3H), 6.97-6.89 (m, 1H), 6.86-6.78 (m, 2H), 6.14-6.04 (m, 2H);  $^{13}\text{C}$  NMR (100 MHz,  $\text{CDCl}_3$ )  $\delta$  148.6, 142.6, 141.9, 139.6, 138.5, 133.7, 131.2, 130.7, 129.2, 128.7, 127.4, 127.0, 126.7, 125.7, 123.8, 120.9, 118.6, 116.4, 115.1, 100.6. FT-IR:  $\nu$  ( $\text{cm}^{-1}$ ) 2956, 2922, 2852, 1584, 1564, 1460, 1440, 1290, 901, 677. HRMS [ESI] calcd for  $\text{C}_{24}\text{H}_{17}\text{INO}_2\text{S}_2^+$   $[\text{M}+\text{H}]^+$  541.9740, found 541.9738.

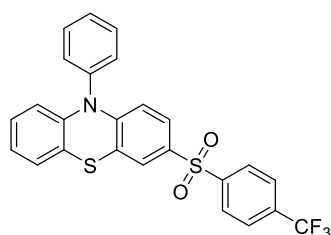

**3j:** 67% yield, 64.7 mg, yellow solid, m.p. 142-143 °C. Purification by flash column chromatography (eluent: EtOAc/Petroleum ether = 1/20).  $^1\text{H}$  NMR (400 MHz,  $\text{CDCl}_3$ )  $\delta$  7.99 (d,  $J = 8.4$  Hz, 2H), 7.74 (d,  $J = 8.0$  Hz, 2H), 7.66-7.60 (m, 2H), 7.56-7.51 (m, 1H), 7.48 (d,  $J = 2.4$  Hz, 1H), 7.35-7.30 (m, 3H), 6.98-6.92 (m, 1H), 6.87-6.79 (m, 2H), 6.13 (d,  $J = 8.8$  Hz, 1H), 6.11-6.07 (m, 1H);  $^{13}\text{C}$  NMR (100 MHz,  $\text{CDCl}_3$ )  $\delta$  148.9, 145.8, 142.5, 139.6, 134.5 (q,  $J_{\text{C-F}} = 32.9$  Hz), 133.1, 131.3, 130.7, 129.2, 127.8, 127.4, 127.3, 126.7, 126.4 (q,  $J_{\text{C-F}} = 3.8$  Hz), 125.9, 123.9, 123.2 (q,  $J_{\text{C-F}} = 271.1$  Hz), 121.1, 118.5, 116.5, 115.1;  $^{19}\text{F}$  NMR (377 MHz,  $\text{CDCl}_3$ )  $\delta$  -63.2 (s). FT-IR:  $\nu$  ( $\text{cm}^{-1}$ ) 3062, 2921, 1586, 1492, 1460, 1402, 1153, 1115, 902, 835, 746, 669. HRMS [ESI] calcd for  $\text{C}_{25}\text{H}_{16}\text{F}_3\text{NNaO}_2\text{S}_2^+$   $[\text{M}+\text{Na}]^+$  506.0467, found 506.0478.

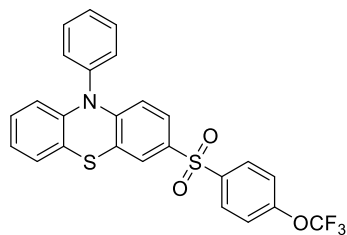

**3k:** 86% yield, 85.5 mg, yellow solid, m.p. 82-83 °C. Purification by flash column chromatography (eluent: EtOAc/Petroleum ether = 1/20). <sup>1</sup>H NMR (400 MHz, CDCl<sub>3</sub>) δ 7.95-7.90 (m, 2H), 7.65-7.60 (m, 2H), 7.55-7.50 (m, 1H), 7.48 (d, *J* = 2.0 Hz, 1H), 7.35-7.27 (m, 5H), 6.97-6.92 (m, 1H), 6.87-6.79 (m, 2H), 6.14 (d, *J* = 8.8 Hz, 1H), 6.12-6.08 (m, 1H); <sup>13</sup>C NMR (100 MHz, CDCl<sub>3</sub>) δ 152.3 (q, *J*<sub>C-F</sub> = 1.9 Hz), 148.7, 142.6, 140.6, 139.7, 133.6, 131.3, 130.7, 129.5, 129.2, 127.4, 127.1, 126.7, 125.8, 123.9, 121.1, 121.0, 120.2 (q, *J*<sub>C-F</sub> = 257.9 Hz), 118.6, 116.5, 115.2; <sup>19</sup>F NMR (377 MHz, CDCl<sub>3</sub>) δ -57.7 (s). FT-IR: ν (cm<sup>-1</sup>) 3058, 2949, 2856, 1586, 1440, 1209, 1115, 812. HRMS [ESI] calcd for C<sub>32</sub>H<sub>25</sub>NKO<sub>4</sub>S<sub>3</sub><sup>+</sup> [M+K]<sup>+</sup> 538.0155, found 538.0142.

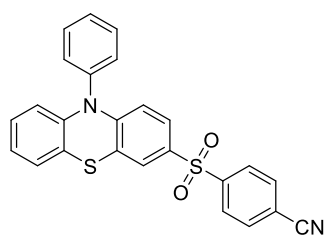

**3l:** 51% yield, 44.9 mg, yellow solid, m.p. 176-177 °C. Purification by flash column chromatography (eluent: EtOAc/Petroleum ether = 1/20). <sup>1</sup>H NMR (400 MHz, CDCl<sub>3</sub>) δ 8.00-7.94 (m, 2H), 7.79-7.73 (m, 2H), 7.67-7.60 (m, 2H), 7.56-7.51 (m, 1H), 7.46 (d, *J* = 2.4 Hz, 1H), 7.35-7.29 (m, 3H), 6.97-6.92 (m, 1H), 6.87-6.79 (m, 2H), 6.13 (d, *J* = 8.8 Hz, 1H), 6.12-6.07 (m, 1H); <sup>13</sup>C NMR (100 MHz, CDCl<sub>3</sub>) δ 149.1, 146.5, 142.4, 139.5, 133.0, 132.5, 131.3, 130.6, 129.3, 127.9, 127.5, 127.4, 126.8, 126.0, 124.0, 121.2, 118.4, 117.3, 116.6, 116.5, 115.2. FT-IR: ν (cm<sup>-1</sup>) 3096, 3059, 2228, 1583, 1491, 1389, 1314, 1248, 1117, 900, 816, 767. HRMS [ESI] calcd for C<sub>25</sub>H<sub>16</sub>N<sub>2</sub>NaO<sub>2</sub>S<sub>2</sub><sup>+</sup> [M+Na]<sup>+</sup> 463.0545, found 463.0546.

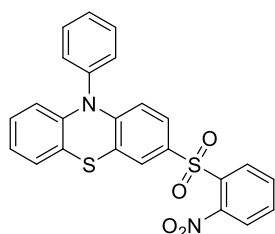

**3m:** 31% yield, 28.9 mg, yellow solid, m.p. 88-89 °C. Purification by flash column chromatography (eluent: Acetone/Petroleum ether = 1/10). <sup>1</sup>H NMR (400 MHz, CDCl<sub>3</sub>) δ 8.25-8.20 (m, 1H), 7.75-7.60 (m, 5H), 7.57-7.51 (m, 1H), 7.50 (d, *J* = 2.4 Hz, 1H), 7.41 (dd, *J* = 4.8, 2.4 Hz, 1H), 7.37-7.30 (m, 2H), 6.98-6.90 (m, 1H), 6.87-6.78 (m, 2H), 6.17 (d, *J* = 9.2 Hz, 1H), 6.13-6.05 (m, 1H); <sup>13</sup>C NMR (100 MHz, CDCl<sub>3</sub>) δ 148.9, 148.3, 142.5, 139.6, 135.1, 134.2, 132.7, 132.4, 131.3, 130.7, 129.2, 128.2, 127.4, 126.7, 126.5, 124.6, 123.9, 120.5, 118.7, 116.5, 114.7. FT-IR: ν (cm<sup>-1</sup>) 3021, 2947, 1585, 1562, 1540, 1492, 1367, 1314, 1287, 1258, 1154, 697, 660, 649. HRMS [ESI] calcd for C<sub>24</sub>H<sub>17</sub>N<sub>2</sub>O<sub>4</sub>S<sub>2</sub><sup>+</sup> [M+H]<sup>+</sup> 461.0624 found 461.0630.

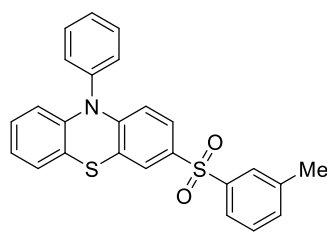

**3n:** 96% yield, 82.4 mg, yellow solid, m.p. 84-85 °C. Purification by flash column chromatography (eluent: EtOAc/Petroleum ether = 1/20). <sup>1</sup>H NMR (400 MHz, CDCl<sub>3</sub>) δ 7.70-7.65 (m, 2H), 7.64-7.59 (m, 2H), 7.55-7.47 (m, 2H), 7.38-7.30 (m, 5H), 6.97-6.92 (m, 1H), 6.85-6.77 (m, 2H), 6.15-6.08 (m, 2H), 2.38 (s, 3H); <sup>13</sup>C NMR (100 MHz, CDCl<sub>3</sub>) δ 148.3, 142.8, 141.9, 139.7, 139.5, 134.5, 133.8, 131.2, 130.7, 129.1,

127.6, 127.3, 127.0, 126.7, 125.8, 124.5, 123.7, 120.7, 118.7, 116.4, 115.1, 21.4. FT-IR:  $\nu$  ( $\text{cm}^{-1}$ ) 3058, 2949, 2856, 1585, 1492, 1440, 1390, 1258, 902, 811, 724, 631. HRMS [ESI] calcd for  $\text{C}_{25}\text{H}_{19}\text{NNaO}_2\text{S}_2^+$   $[\text{M}+\text{Na}]^+$  452.0749, found 452.0750.

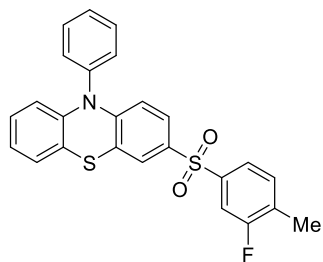

**3o**: 89% yield, 79.3 mg, yellow solid, m.p. 86-87 °C. Purification by flash column chromatography (eluent: EtOAc/Petroleum ether = 1/25-1/20).  $^1\text{H}$  NMR (400 MHz,  $\text{CDCl}_3$ )  $\delta$  7.66-7.59 (m, 2H), 7.58-7.47 (m, 3H), 7.46 (d,  $J$  = 2.0 Hz, 1H), 7.36-7.26 (m, 4H), 6.97-6.91 (m, 1H), 6.85-6.78 (m, 2H), 6.12 (d,  $J$  = 4.8 Hz, 1H), 6.11-6.07 (m, 1H), 2.29 (d,  $J$  = 1.6 Hz, 3H);  $^{13}\text{C}$  NMR (100 MHz,  $\text{CDCl}_3$ )  $\delta$  160.9 (d,  $J_{\text{C-F}}$  = 248.8 Hz), 148.5, 142.7, 141.4 (d,  $J_{\text{C-F}}$  = 6.5 Hz), 139.7, 134.0, 132.3 (d,  $J_{\text{C-F}}$  = 4.9 Hz), 131.2, 131.0 (d,  $J_{\text{C-F}}$  = 17.3 Hz), 130.7, 129.2, 127.4, 127.0, 126.7, 125.8, 123.8, 122.8 (d,  $J_{\text{C-F}}$  = 3.6 Hz), 120.9, 118.6, 116.4, 115.1, 114.2 (d,  $J_{\text{C-F}}$  = 25.2 Hz), 14.8 (d,  $J_{\text{C-F}}$  = 3.5 Hz);  $^{19}\text{F}$  NMR (377 MHz,  $\text{CDCl}_3$ )  $\delta$  -113.5 (s). FT-IR:  $\nu$  ( $\text{cm}^{-1}$ ) 3061, 2924, 1585, 1562, 1490, 1458, 1440, 1286, 1228, 1189, 1149, 1129, 746, 708, 681, 653. HRMS [ESI] calcd for  $\text{C}_{25}\text{H}_{18}\text{FNNaO}_2\text{S}_2^+$   $[\text{M}+\text{Na}]^+$  470.0655, found 470.0651.

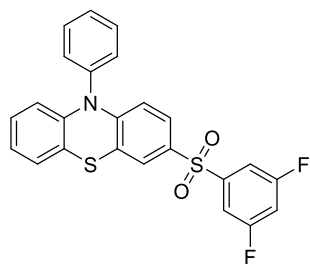

**3p**: 96% yield, 86.6 mg, yellow solid, m.p. 74-75 °C. Purification by flash column chromatography (eluent: EtOAc/Petroleum ether = 1/20).  $^1\text{H}$  NMR (400 MHz,  $\text{CDCl}_3$ )  $\delta$  7.67-7.61 (m, 2H), 7.56-7.51 (m, 1H), 7.46 (d,  $J$  = 2.0 Hz, 1H), 7.43-7.37 (m, 2H), 7.36-7.29 (m, 3H), 7.01-6.92 (m, 2H), 6.87-6.80 (m, 2H), 6.14 (d,  $J$  = 8.8 Hz, 1H), 6.13-6.07 (m, 1H);  $^{13}\text{C}$  NMR (100 MHz,  $\text{CDCl}_3$ )  $\delta$  162.9 (dd,  $J_{\text{C-F}}$  = 253.5, 4.1 Hz), 149.0, 145.6 (t,  $J_{\text{C-F}}$  = 7.8 Hz), 142.5, 139.6, 132.6, 131.3, 130.6, 129.3, 127.4, 127.4, 126.8, 125.9, 124.0, 121.1, 118.5, 116.5, 115.2, 110.8 (dd,  $J_{\text{C-F}}$  = 8.3, 19.5 Hz), 108.5 (t,  $J_{\text{C-F}}$  = 24.9 Hz);  $^{19}\text{F}$  NMR (377 MHz,  $\text{CDCl}_3$ )  $\delta$  -105.2 (s). FT-IR:  $\nu$  ( $\text{cm}^{-1}$ ) 3083, 2927, 1600, 1491, 1390, 1152, 985. HRMS [ESI] calcd for  $\text{C}_{24}\text{H}_{15}\text{F}_2\text{NNaO}_2\text{S}_2^+$   $[\text{M}+\text{Na}]^+$  474.0404, found 474.0414.

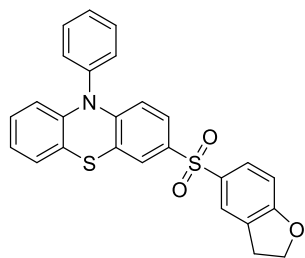

**3q**: 92% yield, 84.6 mg, yellow solid, m.p. 206-207 °C. Purification by flash column chromatography (eluent: EtOAc/Petroleum ether = 1/15-1/10).  $^1\text{H}$  NMR (400 MHz,  $\text{CDCl}_3$ )  $\delta$  7.69-7.65 (m, 2H) 7.64-7.59 (m, 2H), 7.54-7.49 (m, 1H), 7.46 (d,  $J$  = 2.0 Hz, 1H), 7.35-7.28 (m, 3H), 6.97-6.91 (m, 1H), 6.85-6.76 (m, 3H), 6.14-6.07 (m, 2H), 4.62 (t,  $J$  = 8.8 Hz, 2H), 3.21 (t,  $J$  = 8.8 Hz, 2H);  $^{13}\text{C}$  NMR (100 MHz,  $\text{CDCl}_3$ )  $\delta$  164.1, 148.0, 142.8, 139.8, 135.4, 133.7, 131.2, 130.7, 129.1, 129.0, 128.6, 127.3, 126.7, 126.6, 125.5, 124.6, 123.6, 120.7, 118.7, 116.3, 115.1, 109.7, 72.4, 29.0. FT-IR:  $\nu$  ( $\text{cm}^{-1}$ ) 3062, 2845, 1585, 1491, 1303, 1285, 1147, 980. HRMS [ESI] calcd for  $\text{C}_{26}\text{H}_{20}\text{NO}_3\text{S}_2^+$   $[\text{M}+\text{H}]^+$  458.0879, found 458.0876.

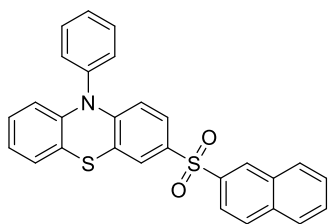

**3r:** 84% yield, 78.2 mg, yellow solid, m.p. 107-108 °C. Purification by flash column chromatography (eluent: EtOAc/Petroleum ether = 1/20-1/10). <sup>1</sup>H NMR (400 MHz, CDCl<sub>3</sub>) δ 8.50 (s, 1H), 7.94 (d, *J* = 8.4 Hz, 1H), 7.89 (d, *J* = 8.8 Hz, 1H), 7.84 (d, *J* = 7.6 Hz, 1H), 7.80 (dd, *J* = 8.4, 0.8 Hz, 1H), 7.64-7.54 (m, 5H), 7.53-7.46 (m, 1H), 7.40 (dd, *J* = 8.8, 2.0 Hz, 1H), 7.29 (d, *J* = 7.2 Hz, 2H), 6.96-6.90 (m, 1H), 6.84-6.77 (m, 2H), 6.12 (d, *J* = 8.8 Hz, 1H), 6.10-6.03 (m, 1H); <sup>13</sup>C NMR (100 MHz, CDCl<sub>3</sub>) δ 148.4, 142.7, 139.7, 139.0, 134.9, 134.4, 132.3, 131.2, 130.7, 129.6, 129.4, 129.1, 129.0, 128.6, 127.9, 127.6, 127.3, 127.1, 126.7, 125.8, 123.7, 122.5, 120.8, 118.7, 116.4, 115.1. FT-IR: ν (cm<sup>-1</sup>) 2955, 2920, 2851, 1723, 1645, 1585, 1492, 1388, 1131, 1068, 680, 648. HRMS [ESI] calcd for C<sub>28</sub>H<sub>19</sub>NNaO<sub>2</sub>S<sub>2</sub><sup>+</sup> [M+Na]<sup>+</sup> 488.0749, found 488.0741.

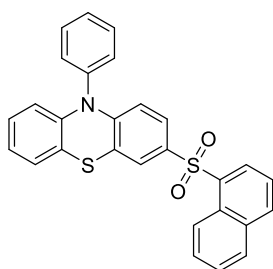

**3s:** 76% yield, 71.2 mg, yellow solid, m.p. 136-137 °C. Purification by flash column chromatography (eluent: EtOAc/Petroleum ether = 1/20-1/10). <sup>1</sup>H NMR (400 MHz, CDCl<sub>3</sub>) δ 8.63 (d, *J* = 8.4 Hz, 1H), 8.41 (d, *J* = 7.6 Hz, 1H), 8.06 (d, *J* = 8.0 Hz, 1H), 7.89 (d, *J* = 8.0 Hz, 1H), 7.63-7.47 (m, 7H), 7.39 (dd, *J* = 8.8, 3.0 Hz, 1H), 7.32-7.27 (m, 2H), 6.95-6.88 (m, 1H), 6.84-6.76 (m, 2H), 6.12-6.03 (m, 2H); <sup>13</sup>C NMR (100 MHz, CDCl<sub>3</sub>) δ 148.2, 142.7, 139.7, 136.3, 134.9, 134.5, 134.2, 131.2, 130.7, 129.6, 129.1, 129.0, 128.4, 127.3, 126.8, 126.8, 126.7, 125.6, 124.4, 123.7, 120.6, 118.6, 116.3, 114.8. FT-IR: ν (cm<sup>-1</sup>) 2923, 2854, 1585, 1563, 1459, 1440, 1258, 1099, 1075, 1043, 708, 681. HRMS [ESI] calcd for C<sub>28</sub>H<sub>19</sub>NNaO<sub>2</sub>S<sub>2</sub><sup>+</sup> [M+Na]<sup>+</sup> 488.0749, found 488.0757.

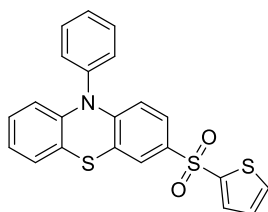

**3t:** 95% yield, 80.0 mg, yellow solid, m.p. 90-91 °C. Purification by flash column chromatography (eluent: EtOAc/Petroleum ether = 1/20-1/10). <sup>1</sup>H NMR (400 MHz, CDCl<sub>3</sub>) δ 7.66-7.60 (m, 3H), 7.59 (d, *J* = 4.8 Hz, 1H), 7.56-7.49 (m, 2H), 7.37 (dd, *J* = 8.8, 2.0 Hz, 1H), 7.33 (d, *J* = 7.6 Hz, 2H), 7.07-7.01 (m, 1H), 6.97-6.92 (m, 1H), 6.86-6.78 (m, 2H), 6.16-6.07 (m, 2H); <sup>13</sup>C NMR (100 MHz, CDCl<sub>3</sub>) δ 148.5, 143.7, 142.7, 139.7, 134.7, 133.3, 132.7, 131.2, 130.7, 129.2, 127.8, 127.4, 126.7, 126.7, 125.5, 123.8, 120.8, 118.6, 116.4, 115.1. FT-IR: ν (cm<sup>-1</sup>) 3089, 3059, 2160, 1585, 1458, 1258, 1111, 937. HRMS [ESI] calcd for C<sub>22</sub>H<sub>16</sub>NO<sub>2</sub>S<sub>3</sub><sup>+</sup> [M+H]<sup>+</sup> 422.0338, found 422.0349.

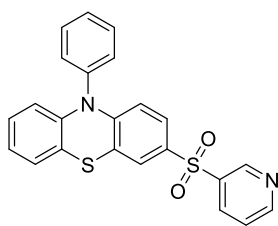

**3u:** 22% yield, 17.8 mg, yellow oil. Purification by flash column chromatography (eluent: EtOAc/Petroleum ether = 1/10-1/5). <sup>1</sup>H NMR (400 MHz, CDCl<sub>3</sub>) δ 9.07 (s, 1H), 8.76 (s, 1H), 8.13 (d, *J* = 8.0 Hz, 1H), 7.66-7.60 (m, 2H), 7.56-7.51 (m, 1H), 7.48 (d, *J* = 2.0 Hz, 1H), 7.45-7.39 (m, 1H), 7.36-7.30 (m, 3H), 6.98-6.92 (m, 1H), 6.87-6.79 (m, 2H), 6.13 (d, *J* = 8.8 Hz, 1H), 6.11-6.07 (m, 1H); <sup>13</sup>C NMR (100 MHz, CDCl<sub>3</sub>) δ 153.3, 148.9, 148.4, 142.5, 139.6, 134.9, 133.2, 131.3, 130.6, 129.2, 127.4, 127.2, 126.7, 125.8, 123.9, 121.1, 118.5,



116.5, 115.2. FT-IR:  $\nu$  ( $\text{cm}^{-1}$ ) 3059, 2922, 2852, 1721, 1585, 1562, 1492, 1458, 1307, 1155, 1126, 740, 723, 678. HRMS [ESI] calcd for  $\text{C}_{23}\text{H}_{17}\text{N}_2\text{O}_2\text{S}_2^+$   $[\text{M}+\text{H}]^+$  417.0726, found 417.0727.

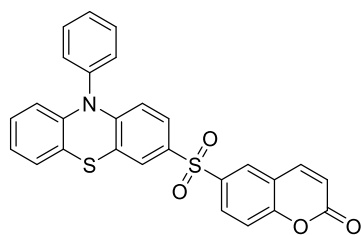

**3v**: 65% yield, 63.2 mg, yellow solid, m.p. 125-126 °C. Purification by flash column chromatography (eluent: EtOAc/Petroleum ether = 1/15-1/10).  $^1\text{H}$  NMR (400 MHz,  $\text{CDCl}_3$ )  $\delta$  8.07 (d,  $J = 2.4$  Hz, 1H), 7.95 (dd,  $J = 8.8, 2.4$  Hz, 1H), 7.73 (d,  $J = 9.6$  Hz, 1H), 7.65-7.58 (m, 2H), 7.55-7.48 (m, 1H), 7.46 (d,  $J = 2.0$  Hz, 1H), 7.37 (d,  $J = 8.8$  Hz, 1H), 7.34-7.29 (m, 3H), 6.95-6.89 (m, 1H), 6.85-6.77 (m, 2H), 6.49 (d,  $J = 9.6$  Hz, 1H), 6.12 (d,  $J = 8.8$  Hz, 1H), 6.10-6.06 (m, 1H);  $^{13}\text{C}$  NMR (100 MHz,  $\text{CDCl}_3$ )  $\delta$  159.3, 156.5, 148.7, 142.5, 142.5, 139.6, 138.6, 133.5, 131.3, 130.6, 130.4, 129.2, 127.6, 127.4, 127.0, 126.7, 125.7, 123.9, 121.0, 119.0, 118.4, 118.3, 118.1, 116.5, 115.2. FT-IR:  $\nu$  ( $\text{cm}^{-1}$ ) 3071, 2931, 1593, 1493, 1391, 1149, 985. HRMS [ESI] calcd for  $\text{C}_{27}\text{H}_{17}\text{NNaO}_4\text{S}_2^+$   $[\text{M}+\text{Na}]^+$  506.0491, found 506.0480.

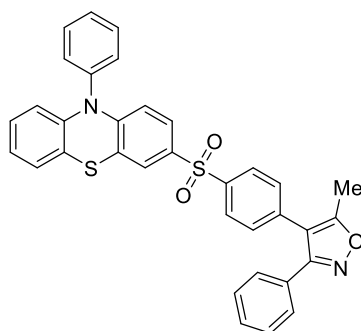

**3w**: 82% yield, 93.9 mg, yellow solid, m.p. 125-126 °C. Purification by flash column chromatography (eluent: EtOAc/Petroleum ether = 1/20-1/8).  $^1\text{H}$  NMR (400 MHz,  $\text{CDCl}_3$ )  $\delta$  7.85 (d,  $J = 8.4$  Hz, 2H), 7.67-7.59 (m, 2H), 7.54 (d,  $J = 7.6$  Hz, 1H), 7.51 (d,  $J = 2.4$  Hz, 1H), 7.43-7.26 (m, 10H), 6.98-6.91 (m, 1H), 6.87-6.77 (m, 2H), 6.16 (d,  $J = 8.8$  Hz, 1H), 6.13-6.08 (m, 1H), 2.45 (s, 3H);  $^{13}\text{C}$  NMR (100 MHz,  $\text{CDCl}_3$ )  $\delta$  167.4, 161.1, 148.6, 142.7, 141.3, 139.6, 135.5, 133.9, 131.3, 130.7, 130.4, 129.7, 129.2, 128.8, 128.5, 128.4, 127.7, 127.4, 127.2, 126.7, 126.0, 123.8, 120.9, 118.6, 116.5, 115.1, 114.4, 11.8. FT-IR:  $\nu$  ( $\text{cm}^{-1}$ ) 3060, 2923, 1617, 1585, 1562, 1492, 1459, 1440, 1392, 1258, 1184, 1153, 1115, 937, 725, 708, 661. HRMS [ESI] calcd for  $\text{C}_{34}\text{H}_{24}\text{N}_2\text{NaO}_3\text{S}_2^+$   $[\text{M}+\text{Na}]^+$  595.1121, found 595.1127.

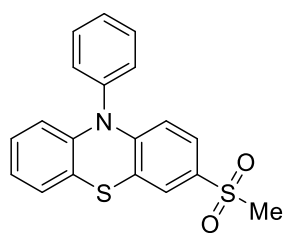

**3x**: 51% yield, 35.7 mg, yellow solid, m.p. 163-164 °C. Purification by flash column chromatography (eluent: EtOAc/Petroleum ether = 1/10).  $^1\text{H}$  NMR (400 MHz,  $\text{CDCl}_3$ )  $\delta$  7.69-7.62 (m, 2H), 7.58-7.52 (m, 1H), 7.48 (d,  $J = 2.0$  Hz, 1H), 7.40-7.34 (m, 2H), 7.31 (dd,  $J = 8.8, 2.4$  Hz, 1H), 7.00-6.92 (m, 1H), 6.88-6.80 (m, 2H), 6.16 (d,  $J = 8.8$  Hz, 1H), 6.15-6.10 (m, 1H), 2.98 (s, 3H);  $^{13}\text{C}$  NMR (100 MHz,  $\text{CDCl}_3$ )  $\delta$  148.7, 142.7, 139.8, 133.4, 131.3, 130.7, 129.2, 127.4, 126.8, 126.6, 125.6, 123.8, 120.9, 118.6, 116.4, 115.0, 44.8. FT-IR:  $\nu$  ( $\text{cm}^{-1}$ ) 2922, 2852, 1600, 1585, 1491, 1444, 1389, 1322, 1280, 1259, 1100, 1003, 889, 820, 771. HRMS [ESI] calcd for  $\text{C}_{19}\text{H}_{15}\text{NNaO}_2\text{S}_2^+$   $[\text{M}+\text{Na}]^+$  376.0436, found 376.0427.

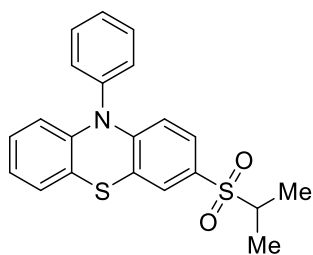

**3y:** 96% yield, 73.1 mg, yellow oil, Purification by flash column chromatography (eluent: EtOAc/Petroleum ether = 1/20).  $^1\text{H}$  NMR (400 MHz,  $\text{CDCl}_3$ )  $\delta$  7.68-7.61 (m, 2H), 7.57-7.50 (m, 1H), 7.41 (d,  $J = 2.0$  Hz, 1H), 7.39-7.34 (m, 2H), 7.26-7.21 (m, 1H), 7.00-6.93 (m, 1H), 6.88-6.79 (m, 2H), 6.17 (d,  $J = 8.8$  Hz, 1H), 6.15-6.10 (m, 1H), 3.16-3.04 (m, 1H), 1.26 (d,  $J = 6.8$  Hz, 6H);  $^{13}\text{C}$  NMR (100 MHz,  $\text{CDCl}_3$ )  $\delta$  148.7, 142.8, 139.8, 131.3, 130.8, 129.6, 129.2, 128.3, 127.4, 127.1, 126.8, 123.8, 120.6, 118.8, 116.4, 114.8, 55.7, 15.8. FT-IR:  $\nu$  ( $\text{cm}^{-1}$ ) 3075, 2983, 2922, 2851, 1647, 1583, 1491, 1241, 1075, 939. HRMS [ESI] calcd for  $\text{C}_{21}\text{H}_{20}\text{NO}_2\text{S}_2^+$  [ $\text{M}+\text{H}$ ] $^+$  382.0930, found 382.0939.

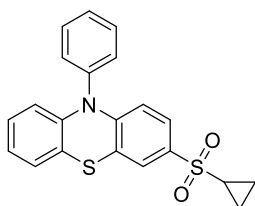

**3z:** 78% yield, 59.3 mg, yellow solid, m.p. 77-78 °C. Purification by flash column chromatography (eluent: EtOAc/Petroleum ether = 1/15-1/10).  $^1\text{H}$  NMR (400 MHz,  $\text{CDCl}_3$ )  $\delta$  7.68-7.62 (m, 2H), 7.57-7.51 (m, 1H), 7.44 (d,  $J = 2.0$  Hz, 1H), 7.39-7.35 (m, 2H), 7.29-7.26 (m, 1H), 7.00-6.94 (m, 1H), 6.88-6.80 (m, 2H), 6.17 (d,  $J = 8.8$  Hz, 1H), 6.15-6.10 (m, 1H), 2.43-2.34 (m, 1H), 1.28-1.24 (m, 2H), 1.02-0.94 (m, 2H);  $^{13}\text{C}$  NMR (100 MHz,  $\text{CDCl}_3$ )  $\delta$  148.5, 142.8, 139.8, 133.6, 131.3, 130.8, 129.1, 127.3, 126.8, 126.8, 125.8, 123.7, 120.7, 118.7, 116.4, 115.0, 33.2, 5.9. FT-IR:  $\nu$  ( $\text{cm}^{-1}$ ) 3155, 3000, 2944, 2160, 1575, 1496, 1447, 1345, 1293, 1217, 1119, 917, 788, 689. HRMS [ESI] calcd for  $\text{C}_{21}\text{H}_{17}\text{NNaO}_2\text{S}_2^+$  [ $\text{M}+\text{Na}$ ] $^+$  402.0593, found 402.0586.

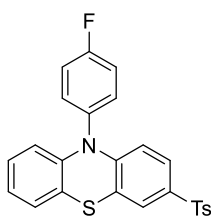

**3aa:** 92% yield, 82.4 mg, yellow solid, m.p. 90-91 °C. Purification by flash column chromatography (eluent: EtOAc/Petroleum ether = 1/15).  $^1\text{H}$  NMR (400 MHz,  $\text{CDCl}_3$ )  $\delta$  7.74 (d,  $J = 8.4$  Hz, 2H), 7.47 (d,  $J = 2.0$  Hz, 1H), 7.33 (dd,  $J = 8.4, 2.0$  Hz, 1H), 7.31-7.27 (m, 4H), 7.26-7.23 (m, 2H), 6.96-6.91 (m, 1H), 6.85-6.80 (m, 2H), 6.12-6.05 (m, 2H), 2.36 (s, 3H);  $^{13}\text{C}$  NMR (100 MHz,  $\text{CDCl}_3$ )  $\delta$  162.4 (d,  $J_{\text{C-F}} = 248.4$  Hz), 148.1, 143.9, 142.7, 139.1, 135.6 (d,  $J_{\text{C-F}} = 3.5$  Hz), 135.0, 132.7 (d,  $J_{\text{C-F}} = 8.5$  Hz), 129.9, 127.4, 126.8, 125.8, 123.8, 120.9, 118.9, 118.2 (d,  $J_{\text{C-F}} = 22.6$  Hz), 116.2, 115.0, 21.6;  $^{19}\text{F}$  NMR (377 MHz,  $\text{CDCl}_3$ )  $\delta$  -111.0 (s). FT-IR:  $\nu$  ( $\text{cm}^{-1}$ ) 3068, 2932, 1592, 1499, 1392, 1299, 1150, 983. HRMS [ESI] calcd for  $\text{C}_{25}\text{H}_{18}\text{FNNaO}_2\text{S}_2^+$  [ $\text{M}+\text{Na}$ ] $^+$  470.0655, found 470.0645.

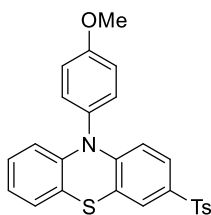

**3ab:** 86% yield, 78.5 mg, yellow solid, m.p. 88-89 °C. Purification by flash column chromatography (eluent: EtOAc/Petroleum ether = 1/15-1/10).  $^1\text{H}$  NMR (400 MHz,  $\text{CDCl}_3$ )  $\delta$  7.80-7.85 (m, 2H), 7.50-7.45 (m, 1H), 7.36-7.32 (m, 1H), 7.30-7.20 (m, 4H), 7.15-7.09 (m, 2H), 6.97-6.91 (m, 1H), 6.88-6.80 (m, 2H), 6.20-6.10 (m, 2H), 3.90 (s, 3H), 2.39 (s, 3H);  $^{13}\text{C}$  NMR (100 MHz,  $\text{CDCl}_3$ )  $\delta$  159.7, 148.6, 143.8, 143.1, 139.2, 134.6, 132.1, 131.7, 129.9, 127.3, 127.3, 126.8, 126.7, 125.6, 123.6, 120.6, 118.6, 116.3, 116.3, 115.1, 55.6, 21.6. FT-IR:  $\nu$  ( $\text{cm}^{-1}$ ) 3057, 2956, 2924, 2841,

1591, 1391, 1300, 1151, 910. HRMS [ESI] calcd for  $C_{26}H_{22}NO_3S_2^+$   $[M+H]^+$  460.1036, found 460.1045.

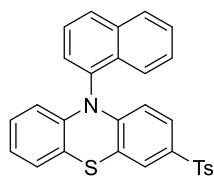

**3ac:** 90% yield, 86.2 mg, yellow solid, m.p. 105-106 °C. Purification by flash column chromatography (eluent: EtOAc/Petroleum ether = 1/15).  $^1H$  NMR (400 MHz,  $CDCl_3$ )  $\delta$  8.04-7.93 (m, 3H), 7.77-7.72 (m, 2H), 7.68-7.63 (m, 1H), 7.58-7.53 (m, 2H), 7.52 (d,  $J = 2.4$  Hz, 1H), 7.48-7.42 (m, 1H), 7.27-7.24 (m, 2H), 7.20 (dd,  $J = 8.8, 2.4$  Hz, 1H), 6.97 (dd,  $J = 7.6, 1.6$  Hz, 1H), 6.83-6.78 (m, 1H), 6.72-6.67 (m, 1H), 5.99-5.93 (m, 2H), 2.37 (s, 3H);  $^{13}C$  NMR (100 MHz,  $CDCl_3$ )  $\delta$  147.8, 143.9, 142.3, 139.1, 136.1, 135.5, 134.9, 130.8, 129.9, 129.7, 128.9, 128.9, 127.7, 127.4, 127.1, 126.9, 126.6, 126.6, 125.6, 123.8, 123.1, 120.8, 118.7, 116.5, 115.3, 21.6. FT-IR:  $\nu$  ( $cm^{-1}$ ) 3060, 2947, 1592, 1459, 1306, 1245, 1014, 987. HRMS [ESI] calcd for  $C_{29}H_{22}NO_2S_2^+$   $[M+H]^+$  480.1086, found 480.1097.

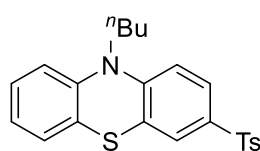

**3ad:** 92% yield, 74.8 mg, yellow solid, m.p. 67-68 °C. Purification by flash column chromatography (eluent: EtOAc/Petroleum ether = 1/9).  $^1H$  NMR (500 MHz,  $CDCl_3$ )  $\delta$  7.78 (d,  $J = 8.5$  Hz, 2H), 7.68 (dd,  $J = 9.0, 2.5$  Hz, 1H), 7.59 (d,  $J = 2.0$  Hz, 1H), 7.27 (d,  $J = 8.5$  Hz, 2H), 7.18-7.12 (m, 1H), 7.10-7.05 (m, 1H), 6.98-6.91 (m, 1H), 6.88-6.81 (m, 2H), 3.83 (t,  $J = 7.0$  Hz, 2H), 2.38 (s, 3H), 1.78-1.70 (m, 2H), 1.47-1.38 (m, 2H), 0.92 (t,  $J = 7.0$  Hz, 3H);  $^{13}C$  NMR (125 MHz,  $CDCl_3$ )  $\delta$  149.6, 143.9, 143.6, 139.2, 134.8, 129.9, 127.7, 127.6, 127.4, 127.2, 126.5, 125.7, 123.6, 123.6, 116.0, 114.9, 47.5, 28.7, 21.6, 20.0, 13.8. FT-IR:  $\nu$  ( $cm^{-1}$ ) 3059, 2925, 2870, 1563, 1299, 1150, 1098. HRMS [ESI] calcd for  $C_{23}H_{23}NNaO_2S_2^+$   $[M+Na]^+$  432.1062, found 432.1060.

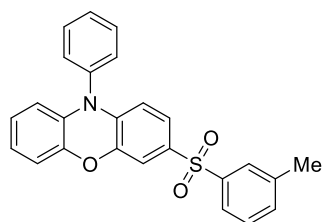

**3ae:** 92% yield, 76.0 mg, yellow solid, m.p. 156-157 °C. Purification by flash column chromatography (eluent: EtOAc/Petroleum ether = 1/20-1/10).  $^1H$  NMR (400 MHz,  $CDCl_3$ )  $\delta$  7.73-7.64 (m, 2H), 7.63-7.55 (m, 2H), 7.52-7.46 (m, 1H), 7.38-7.30 (m, 2H), 7.28-7.23 (m, 2H), 7.19-7.10 (m, 2H), 6.70-6.55 (m, 3H), 5.94-5.81 (m, 2H), 2.38 (s, 3H);  $^{13}C$  NMR (100 MHz,  $CDCl_3$ )  $\delta$  144.0, 143.5, 142.1, 139.5, 138.9, 137.5, 133.7, 133.1, 132.8, 131.4, 130.2, 129.3, 127.6, 124.5, 124.0, 123.8, 122.8, 115.6, 114.5, 113.9, 112.8, 21.4. FT-IR:  $\nu$  ( $cm^{-1}$ ) 2999, 2940, 2879, 2436, 2117, 1565, 1493, 1458, 1415, 1309, 1258, 1154, 1009, 724, 694. HRMS [ESI] calcd for  $C_{25}H_{20}NO_3S^+$   $[M+H]^+$  414.1158, found 414.1157.

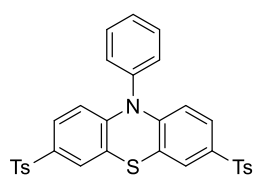

**4a:** 96% yield, 111.9 mg, yellow solid, m.p. 142-143 °C. Purification by flash column chromatography (eluent: EtOAc/Petroleum ether = 1/10-1/5).  $^1H$  NMR (400 MHz,  $CDCl_3$ )  $\delta$  7.77-7.70 (m, 4H), 7.66-7.59 (m, 2H), 7.57-7.51 (m, 1H), 7.43 (d,  $J = 2.0$  Hz, 2H), 7.32 (dd,  $J = 8.8, 2.4$  Hz, 2H), 7.29-7.24 (m,

6H), 6.12-6.05 (m, 2H), 2.38 (s, 6H);  $^{13}\text{C}$  NMR (100 MHz,  $\text{CDCl}_3$ )  $\delta$  146.7, 144.1, 138.9, 138.8, 136.4, 131.6, 130.2, 130.0, 129.7, 127.4, 127.1, 125.7, 120.0, 116.0, 21.6. FT-IR:  $\nu$  ( $\text{cm}^{-1}$ ) 2974, 2926, 2892, 1455, 1301, 1152, 1044. HRMS [ESI] calcd for  $\text{C}_{32}\text{H}_{25}\text{NNO}_4\text{S}_3^+$  [ $\text{M}+\text{Na}$ ] $^+$  606.0838, found 606.0847.

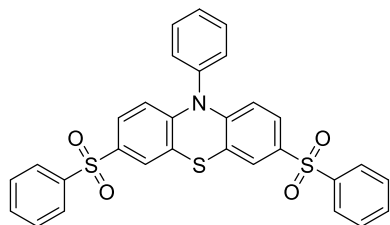

**4b:** 96% yield, 108.7 mg, yellow solid, m.p. 127-128 °C. Purification by flash column chromatography (eluent: EtOAc/Petroleum ether = 1/10-1/6).  $^1\text{H}$  NMR (400 MHz,  $\text{CDCl}_3$ )  $\delta$  7.88-7.81 (m, 4H), 7.65-7.59 (m, 2H), 7.56-7.50 (m, 3H), 7.49-7.41 (m, 6H), 7.33 (dd,  $J$  = 8.8, 2.0 Hz, 2H), 7.26-7.22 (m, 2H), 6.10 (d,  $J$  = 8.8 Hz, 2H);  $^{13}\text{C}$  NMR (100 MHz,  $\text{CDCl}_3$ )  $\delta$  146.9, 141.7, 138.7, 136.0, 133.2, 131.6, 130.2, 129.8, 129.3, 127.4, 125.8, 120.1, 116.1. FT-IR:  $\nu$  ( $\text{cm}^{-1}$ ) 3061, 2925, 1583, 1490, 1391, 1151, 1248, 1112, 902. HRMS [ESI] calcd for  $\text{C}_{30}\text{H}_{22}\text{NO}_4\text{S}_3^+$  [ $\text{M}+\text{H}$ ] $^+$  556.0705, found 556.0695.

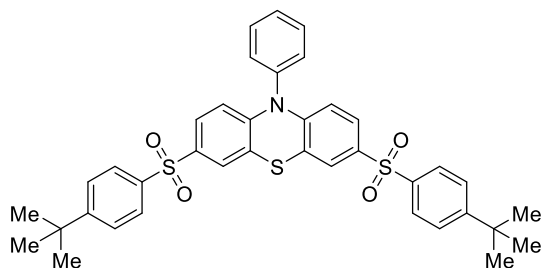

**4c:** 88% yield, 117.5 mg, yellow solid, m.p. >300 °C. Purification by flash column chromatography (eluent: EtOAc/Petroleum ether = 1/10-1/4).  $^1\text{H}$  NMR (400 MHz,  $\text{CDCl}_3$ )  $\delta$  7.80-7.76 (m, 4H), 7.66-7.61 (m, 2H), 7.58-7.54 (m, 1H), 7.51-7.45 (m, 6H), 7.35 (dd,  $J$  = 8.8, 2.0 Hz, 2H), 7.29-7.27 (m, 2H), 6.11 (d,  $J$  = 8.8 Hz, 2H), 1.31 (s, 18H);  $^{13}\text{C}$  NMR (100 MHz,  $\text{CDCl}_3$ )  $\delta$  157.1, 146.8, 138.9, 138.6, 136.4, 131.5, 130.2, 129.7, 127.3, 127.2, 126.3, 125.8, 120.0, 115.9, 35.2, 31.0. FT-IR:  $\nu$  ( $\text{cm}^{-1}$ ) 3065, 2957, 2867, 1587, 1491, 1303, 1246, 1101, 906. HRMS [ESI] calcd for  $\text{C}_{38}\text{H}_{38}\text{NO}_4\text{S}_3^+$  [ $\text{M}+\text{H}$ ] $^+$  668.1957, found 668.1953.

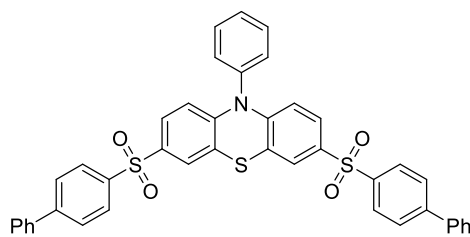

**4d:** 96% yield, 135.7 mg, yellow solid, m.p. 161-162 °C. Purification by flash column chromatography (eluent: EtOAc/Petroleum ether = 1/10-1/5).  $^1\text{H}$  NMR (400 MHz,  $\text{CDCl}_3$ )  $\delta$  7.95-7.90 (m, 4H), 7.69-7.65 (m, 4H), 7.65-7.60 (m, 2H), 7.58-7.52 (m, 5H), 7.50 (d,  $J$  = 2.0 Hz, 2H), 7.47-7.38 (m, 7H), 7.37 (d,  $J$  = 2.0 Hz, 1H), 7.28-7.27 (m, 1H), 7.26-7.24 (m, 1H), 6.13 (d,  $J$  = 8.8 Hz, 2H);  $^{13}\text{C}$  NMR (100 MHz,  $\text{CDCl}_3$ )  $\delta$  146.9, 146.1, 140.2, 139.1, 138.8, 136.2, 131.6, 130.2, 129.8, 129.1, 128.6, 128.0, 127.9, 127.3, 125.9, 120.1, 116.1. FT-IR:  $\nu$  ( $\text{cm}^{-1}$ ) 3060, 3031, 2922, 1677, 1585, 1479, 1303, 1245, 1078, 938. HRMS [ESI] calcd for  $\text{C}_{42}\text{H}_{30}\text{NO}_4\text{S}_3^+$  [ $\text{M}+\text{H}$ ] $^+$  708.1331, found 708.1337.

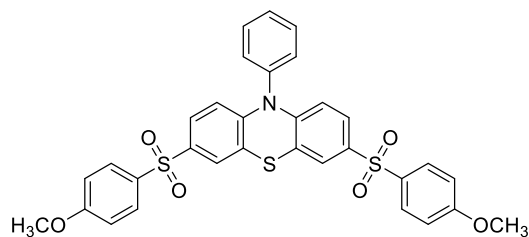

**4e:** 66% yield, 81.2 mg, yellow solid, m.p. 133-134 °C. Purification by flash column chromatography (eluent: EtOAc/Petroleum ether = 1/6-1/2). <sup>1</sup>H NMR (400 MHz, CDCl<sub>3</sub>) δ 7.82-7.77 (m, 4H), 7.65-7.60 (m, 2H), 7.58-7.53 (m, 1H), 7.46-7.41 (m, 2H), 7.33-7.28 (m, 2H), 7.29-7.26 (m, 2H), 6.97-6.92 (m, 4H), 6.12-6.05 (m, 2H), 3.84 (s, 6H); <sup>13</sup>C NMR (100 MHz, CDCl<sub>3</sub>) δ 163.3, 146.6, 138.9, 136.8, 133.2, 131.5, 130.2, 129.7, 129.6, 126.9, 125.5, 120.0, 116.0, 114.6, 55.7. FT-IR: ν (cm<sup>-1</sup>) 3004, 2942, 2838, 1672, 1588, 1414, 1256, 1113, 1022. HRMS [ESI] calcd for C<sub>32</sub>H<sub>25</sub>KNO<sub>6</sub>S<sub>3</sub><sup>+</sup> [M+K]<sup>+</sup> 654.0476, found 654.0482.

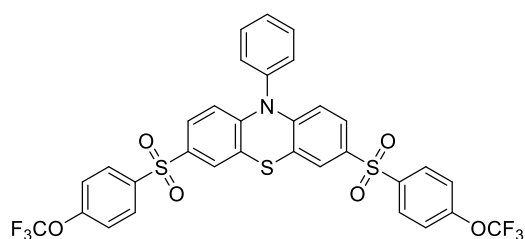

**4f:** 82% yield, 118.1 mg, yellow solid, m.p. 115-116 °C. Purification by flash column chromatography (eluent: EtOAc/Petroleum ether = 1/20-1/10). <sup>1</sup>H NMR (400 MHz, CDCl<sub>3</sub>) δ 7.94-7.88 (m, 4H), 7.66-7.60 (m, 2H), 7.58-7.52 (m, 1H), 7.46 (d, *J* = 2.0 Hz, 2H), 7.34 (dd, *J* = 8.8, 2.4 Hz, 2H), 7.31-7.25 (m, 6H), 6.13 (d, *J* = 8.8 Hz, 2H); <sup>13</sup>C NMR (100 MHz, CDCl<sub>3</sub>) δ 152.5 (q, *J*<sub>C-F</sub> = 1.9 Hz), 147.1, 140.1, 138.7, 135.5, 131.7, 130.1, 129.9, 129.6, 127.5, 125.9, 121.1, 120.3, 120.2 (q, *J*<sub>C-F</sub> = 258.1 Hz), 116.2; <sup>19</sup>F NMR (377 MHz, CDCl<sub>3</sub>) δ -57.7 (s). FT-IR: ν (cm<sup>-1</sup>) 3102, 3066, 2925, 1586, 1459, 1303, 1210, 1015, 901. HRMS [EI] calcd for C<sub>32</sub>H<sub>19</sub>F<sub>6</sub>NO<sub>6</sub>S<sub>3</sub><sup>+</sup> [M]<sup>+</sup> 723.0273, found 723.0272.

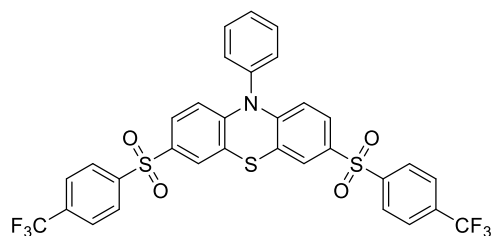

**4g:** 96% yield, 131.6 mg, yellow solid, m.p. 140-141 °C. Purification by flash column chromatography (eluent: EtOAc/Petroleum ether = 1/15). <sup>1</sup>H NMR (400 MHz, CDCl<sub>3</sub>) δ 8.00 (d, *J* = 8.0 Hz, 4H), 7.75 (d, *J* = 8.4 Hz, 4H), 7.68-7.63 (m, 2H), 7.60-7.54 (m, 1H), 7.47 (d, *J* = 2.0 Hz, 2H), 7.36 (dd, *J* = 8.8, 2.4 Hz, 2H), 7.29-7.26 (m, 2H), 6.13 (d, *J* = 8.8 Hz, 2H); <sup>13</sup>C NMR (100 MHz, CDCl<sub>3</sub>) δ 147.2, 145.3, 138.6, 135.0, 134.8 (q, *J*<sub>C-F</sub> = 33.0 Hz), 131.7, 130.1, 129.9, 128.0, 127.7, 126.5 (q, *J*<sub>C-F</sub> = 3.7 Hz), 126.1, 123.1 (q, *J*<sub>C-F</sub> = 271.3 Hz), 120.3, 116.2; <sup>19</sup>F NMR (377 MHz, CDCl<sub>3</sub>) δ -63.2 (s). FT-IR: ν (cm<sup>-1</sup>) 3061, 2957, 2923, 2852, 1723, 1681, 1458, 1247, 1133, 1060. HRMS [ESI] calcd for C<sub>32</sub>H<sub>20</sub>F<sub>6</sub>NO<sub>4</sub>S<sub>3</sub><sup>+</sup> [M+H]<sup>+</sup> 692.0453, found 692.0454.

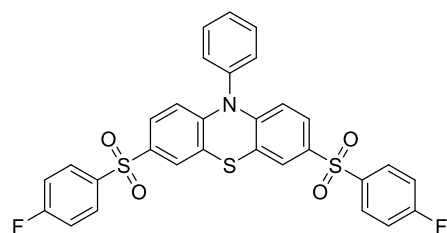

**4h:** 91% yield, 107.8 mg, yellow solid, m.p. 119-120 °C. Purification by flash column chromatography (eluent: EtOAc/Petroleum ether = 1/10-1/5). <sup>1</sup>H NMR (400 MHz, CDCl<sub>3</sub>) δ 7.91-7.84 (m, 4H), 7.67-7.61 (m, 2H), 7.58-7.53 (m,

1H), 7.44 (d,  $J = 2.4$  Hz, 2H), 7.33 (dd,  $J = 8.8, 2.4$  Hz, 2H), 7.30-7.26 (m, 2H), 7.19-7.12 (m, 4H), 6.12 (d,  $J = 8.8$  Hz, 2H);  $^{13}\text{C}$  NMR (100 MHz,  $\text{CDCl}_3$ )  $\delta$  165.4 (d,  $J_{\text{C-F}} = 254.4$  Hz), 146.9, 138.7, 137.8 (d,  $J_{\text{C-F}} = 3.2$  Hz), 135.9, 131.6, 130.3, 130.2 (d,  $J_{\text{C-F}} = 1.4$  Hz), 129.8, 127.3, 125.8, 120.2, 116.6 (d,  $J_{\text{C-F}} = 22.5$  Hz), 116.1;  $^{19}\text{F}$  NMR (377 MHz,  $\text{CDCl}_3$ )  $\delta$  -104.1 (s). FT-IR:  $\nu$  ( $\text{cm}^{-1}$ ) 3102, 3067, 1586, 1560, 1491, 1455, 1397, 1307, 1288, 1235, 1149, 1113, 1076, 834, 753, 674. HRMS [ESI] calcd for  $\text{C}_{30}\text{H}_{19}\text{F}_2\text{NNaO}_4\text{S}_3^+$  [ $\text{M}+\text{Na}$ ] $^+$  614.0336, found 614.0335.

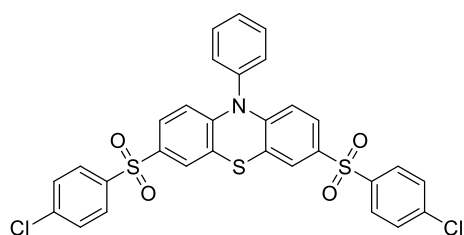

**4i**: 85% yield, 106.4 mg, yellow solid, m.p. 156-157 °C. Purification by flash column chromatography (eluent: EtOAc/Petroleum ether = 1/20-1/10).  $^1\text{H}$  NMR (400 MHz,  $\text{CDCl}_3$ )  $\delta$  7.84-7.76 (m, 4H), 7.67-7.61 (m, 2H), 7.59-7.53 (m, 1H), 7.49-7.40 (m, 6H), 7.33 (dd,  $J = 8.4, 2.0$  Hz, 2H), 7.29-7.25 (m, 2H), 6.12 (d,  $J = 8.8$  Hz, 2H);  $^{13}\text{C}$  NMR (100 MHz,  $\text{CDCl}_3$ )  $\delta$  147.0, 140.2, 139.8, 138.7, 135.6, 131.6, 130.1, 129.8, 129.7, 128.9, 127.4, 125.8, 120.2, 116.2. FT-IR:  $\nu$  ( $\text{cm}^{-1}$ ) 3066, 2947, 1592, 1302, 1244, 1151, 1016, 985. HRMS [EI] calcd for  $\text{C}_{30}\text{H}_{19}\text{Cl}_2\text{NO}_4\text{S}_3^+$  [ $\text{M}$ ] $^+$  622.9848, found 622.9850.

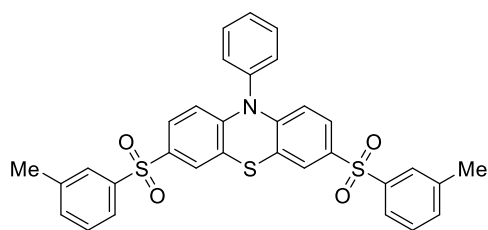

**4j**: 66% yield, 77.6 mg, yellow solid, m.p. 107-108 °C. Purification by flash column chromatography (eluent: EtOAc/Petroleum ether = 1/10-1/4).  $^1\text{H}$  NMR (400 MHz,  $\text{CDCl}_3$ )  $\delta$  7.69-7.61 (m, 6H), 7.58-7.53 (m, 1H), 7.47 (d,  $J = 2.0$  Hz, 2H), 7.37-7.32 (m, 6H), 7.29-7.26 (m, 2H), 6.12 (d,  $J = 8.8$  Hz, 2H), 2.39 (s, 6H);  $^{13}\text{C}$  NMR (100 MHz,  $\text{CDCl}_3$ )  $\delta$  146.8, 141.5, 139.6, 138.8, 136.2, 134.0, 131.6, 130.2, 129.7, 129.2, 127.7, 127.3, 125.8, 124.6, 120.0, 116.0, 21.4. FT-IR:  $\nu$  ( $\text{cm}^{-1}$ ) 3062, 2922, 2854, 1584, 1560, 1492, 1456, 1393, 1300, 1245, 1110, 1077, 727, 684. HRMS [ESI] calcd for  $\text{C}_{32}\text{H}_{26}\text{NO}_4\text{S}_3^+$  [ $\text{M}+\text{H}$ ] $^+$  584.1018, found 584.1015.

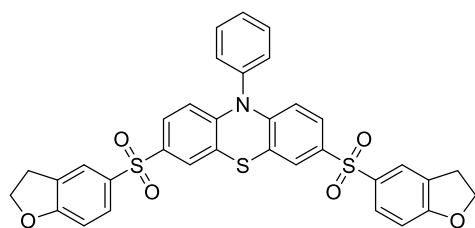

**4k**: 54% yield, 68.9 mg, yellow solid, m.p. 142-143 °C. Purification by flash column chromatography (eluent: EtOAc/Petroleum ether = 1/10-1/4).  $^1\text{H}$  NMR (400 MHz,  $\text{CDCl}_3$ )  $\delta$  7.67-7.58 (m, 6H), 7.57-7.50 (m, 1H), 7.41 (d,  $J = 2.0$  Hz, 2H), 7.30 (dd,  $J = 8.8, 2.0$  Hz, 2H), 7.26-7.24 (m, 2H), 6.80-6.76 (m, 2H), 6.11-6.06 (m, 2H), 4.62 (t,  $J = 8.8$  Hz, 4H), 3.21 (t,  $J = 8.8$  Hz, 4H);  $^{13}\text{C}$  NMR (100 MHz,  $\text{CDCl}_3$ )  $\delta$  164.3, 146.6, 138.9, 137.0, 133.2, 131.5, 130.3, 129.7, 129.2, 128.8, 126.9, 125.5, 124.7, 120.0, 115.9, 109.8, 72.4, 29.0. FT-IR:  $\nu$  ( $\text{cm}^{-1}$ ) 3063, 2957, 2901, 1601, 1561, 1457, 1302, 1174, 1097, 979. HRMS [ESI] calcd for  $\text{C}_{34}\text{H}_{26}\text{NO}_6\text{S}_3^+$  [ $\text{M}+\text{H}$ ] $^+$  640.0917, found 640.0907.

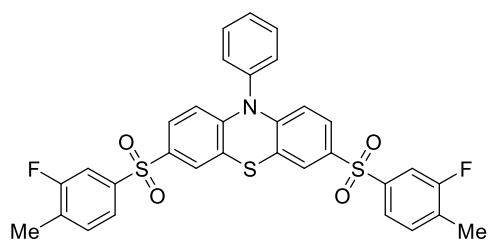

**4l:** 96% yield, 118.8 mg, yellow solid, m.p. 120-121 °C. Purification by flash column chromatography (eluent: EtOAc/Petroleum ether = 1/10-1/6).  $^1\text{H}$  NMR (400 MHz,  $\text{CDCl}_3$ )  $\delta$  7.65-7.61 (m, 2H), 7.57-7.52 (m, 3H), 7.47 (dd,  $J = 8.4, 1.2$  Hz, 2H), 7.42 (d,  $J = 2.0$  Hz, 2H), 7.33 (d,  $J = 2.0$  Hz, 1H), 7.32-7.26 (m, 4H), 7.25-7.23 (m, 1H), 6.11 (d,  $J = 8.8$  Hz, 2H), 2.28 (s, 6H);  $^{13}\text{C}$  NMR (100 MHz,  $\text{CDCl}_3$ )  $\delta$  160.9 (d,  $J_{\text{C-F}} = 249.2$  Hz), 147.0, 140.9 (d,  $J_{\text{C-F}} = 6.5$  Hz), 138.7, 135.7, 132.5 (d,  $J_{\text{C-F}} = 4.8$  Hz), 131.6, 131.3 (d,  $J_{\text{C-F}} = 17.2$  Hz), 130.1, 129.8, 127.4, 125.8, 123.0 (d,  $J_{\text{C-F}} = 3.7$  Hz), 120.2, 116.1, 114.3 (d,  $J_{\text{C-F}} = 25.2$  Hz), 14.8 (d,  $J_{\text{C-F}} = 3.4$  Hz);  $^{19}\text{F}$  NMR (377 MHz,  $\text{CDCl}_3$ )  $\delta$  -113.3 (s). FT-IR:  $\nu$  ( $\text{cm}^{-1}$ ) 3065, 2924, 1591, 1498, 1302, 1245, 1023, 989. HRMS [ESI] calcd for  $\text{C}_{32}\text{H}_{24}\text{F}_2\text{NO}_4\text{S}_3^+$   $[\text{M}+\text{H}]^+$  620.0830, found 620.0822.

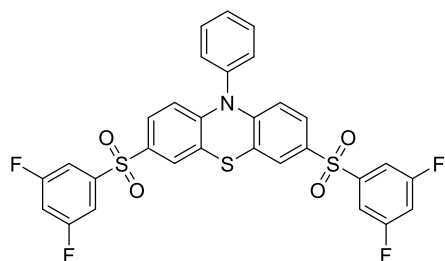

**4m:** 54% yield, 67.9 mg, yellow solid, m.p. 227-228 °C. Purification by flash column chromatography (eluent: EtOAc/Petroleum ether = 1/15-1/10).  $^1\text{H}$  NMR (400 MHz,  $\text{CDCl}_3$ )  $\delta$  7.68-7.63 (m, 2H), 7.60-7.55 (m, 1H), 7.44 (d,  $J = 2.4$  Hz, 2H), 7.42-7.36 (m, 4H), 7.34 (dd,  $J = 8.8, 2.4$  Hz, 2H), 7.30-7.27 (m, 2H), 7.02-6.95 (m, 2H), 6.15 (d,  $J = 8.8$  Hz, 2H);  $^{13}\text{C}$  NMR (100 MHz,  $\text{CDCl}_3$ )  $\delta$  162.9 (dd,  $J_{\text{C-F}} = 253.9, 11.3$  Hz), 147.3, 145.1 (t,  $J_{\text{C-F}} = 7.9$  Hz), 138.5, 134.6, 131.7, 130.1, 130.0, 127.8, 126.1, 120.4, 116.3, 111.0 (dd,  $J_{\text{C-F}} = 19.6, 8.2$  Hz) 108.8 (t,  $J_{\text{C-F}} = 24.8$  Hz);  $^{19}\text{F}$  NMR (377 MHz,  $\text{CDCl}_3$ )  $\delta$  -104.9 (s). FT-IR:  $\nu$  ( $\text{cm}^{-1}$ ) 3090, 2922, 2853, 1604, 1500, 1380, 1196, 985. HRMS [ESI] calcd for  $\text{C}_{30}\text{H}_{18}\text{F}_4\text{NO}_4\text{S}_3^+$   $[\text{M}+\text{H}]^+$  628.0329, found 628.0326.

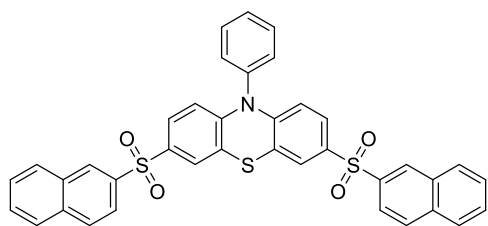

**4n:** 96% yield, 125.8 mg, yellow solid, m.p. 150-151 °C. Purification by flash column chromatography (eluent: EtOAc/Petroleum ether = 1/10).  $^1\text{H}$  NMR (400 MHz,  $\text{CDCl}_3$ )  $\delta$  8.48 (s, 2H), 7.95-7.84 (m, 4H), 7.84-7.73 (m, 4H), 7.61-7.48 (m, 9H), 7.39 (dd,  $J = 8.8, 0.8$  Hz, 2H), 7.18 (d,  $J = 7.2$  Hz, 2H), 6.08 (d,  $J = 7.2$  Hz, 2H);  $^{13}\text{C}$  NMR (100 MHz,  $\text{CDCl}_3$ )  $\delta$  146.8, 138.7, 138.5, 136.0, 134.9, 132.2, 131.6, 130.2, 129.8, 129.4, 129.2, 128.8, 127.9, 127.7, 127.5, 125.9, 122.4, 120.1, 116.1. FT-IR:  $\nu$  ( $\text{cm}^{-1}$ ) 3057, 2924, 2853, 1585, 1457, 1302, 1246, 1067, 904. HRMS [ESI] calcd for  $\text{C}_{38}\text{H}_{25}\text{NNaO}_4\text{S}_3^+$   $[\text{M}+\text{Na}]^+$  678.0838, found 678.0848.

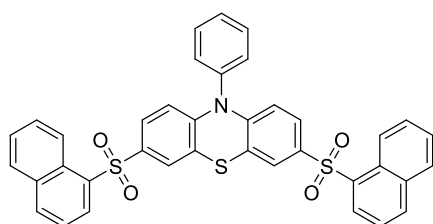

**4o:** 92% yield, 120.7 mg, yellow solid, m.p. 279-280 °C. Purification by flash column chromatography (eluent: EtOAc/Petroleum ether = 1/10-1/6).  $^1\text{H}$  NMR (400 MHz,  $\text{CDCl}_3$ )  $\delta$  8.58 (d,  $J = 8.4$  Hz, 2H), 8.40 (d,  $J = 7.2$  Hz, 2H), 8.05 (d,  $J$

= 8.4 Hz, 2H), 7.87 (d,  $J = 8.0$  Hz, 2H), 7.60-7.48 (m, 9H), 7.43 (d,  $J = 0.8$  Hz, 2H), 7.38 (dd,  $J = 8.8, 2.0$  Hz, 2H), 7.16 (d,  $J = 7.6$  Hz, 2H), 6.03 (d,  $J = 8.4$  Hz, 2H);  $^{13}\text{C}$  NMR (100 MHz,  $\text{CDCl}_3$ )  $\delta$  146.7, 138.8, 136.1, 135.8, 135.1, 134.2, 131.5, 130.2, 129.8, 129.7, 129.1, 128.5, 128.3, 127.1, 126.9, 125.6, 124.4, 124.2, 119.9, 115.7. FT-IR:  $\nu$  ( $\text{cm}^{-1}$ ) 3060, 2923, 2852, 1584, 1561, 1505, 1456, 1394, 1303, 1154, 1099, 768, 727, 679. HRMS [ESI] calcd for  $\text{C}_{38}\text{H}_{25}\text{NNaO}_4\text{S}_3^+$  [ $\text{M}+\text{Na}$ ] $^+$  678.0838, found 678.0846.

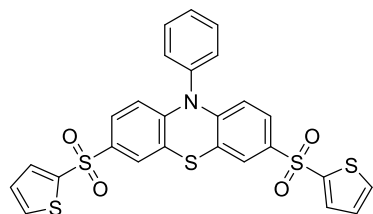

**4p:** 96% yield, 112.7 mg, yellow solid, m.p. 130-131 °C. Purification by flash column chromatography (eluent: EtOAc/Petroleum ether = 1/10-1/3).  $^1\text{H}$  NMR (400 MHz,  $\text{CDCl}_3$ )  $\delta$  7.66-7.55 (m, 7H), 7.50-7.45 (m, 2H), 7.39-7.33 (m, 2H), 7.30-7.26 (m, 2H), 7.06-7.01 (m, 2H), 6.12 (d,  $J = 8.8$  Hz, 2H);  $^{13}\text{C}$  NMR (100 MHz,  $\text{CDCl}_3$ )  $\delta$  146.9, 143.1, 138.7, 136.4, 133.8, 133.1, 131.7, 130.2, 129.8, 129.0, 127.1, 125.5, 120.1, 116.1. FT-IR:  $\nu$  ( $\text{cm}^{-1}$ ) 3344, 3020, 2948, 1569, 1509, 1477, 1400, 1344, 1312, 1201, 1151, 1108, 772, 719. HRMS [ESI] calcd for  $\text{C}_{26}\text{H}_{18}\text{NO}_4\text{S}_5^+$  [ $\text{M}+\text{H}$ ] $^+$  567.9834, found 567.9823.

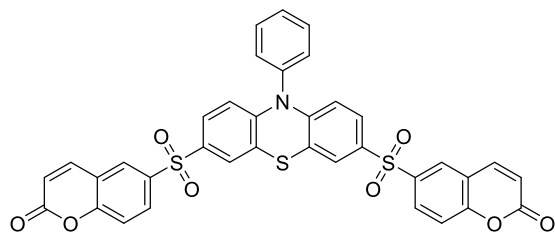

**4q:** 52% yield, 71.9 mg, yellow solid, m.p. >300 °C. Purification by flash column chromatography (eluent: EtOAc/Petroleum ether = 1/6-1/2).  $^1\text{H}$  NMR (400 MHz,  $\text{CDCl}_3$ )  $\delta$  8.07-8.03 (m, 2H), 7.94 (d,  $J = 8.4$  Hz, 2H), 7.72 (d,  $J = 9.2$  Hz, 2H), 7.69-7.51 (m, 4H), 7.48-7.43 (m, 2H), 7.39 (d,  $J = 8.8$  Hz, 2H), 7.34 (d,  $J = 8.4$  Hz, 2H), 7.25-7.21 (m, 1H), 6.52 (d,  $J = 9.6$  Hz, 2H), 6.11 (d,  $J = 8.4$  Hz, 2H);  $^{13}\text{C}$  NMR (100 MHz,  $\text{CDCl}_3$ )  $\delta$  159.1, 156.7, 147.0, 142.3, 138.6, 138.0, 135.5, 131.7, 130.4, 130.1, 129.9, 127.7, 127.5, 125.8, 120.3, 119.1, 118.5, 118.3, 116.2. FT-IR:  $\nu$  ( $\text{cm}^{-1}$ ) 3064, 2924, 2851, 1731, 1621, 1459, 1227, 1109, 932. HRMS [ESI] calcd for  $\text{C}_{36}\text{H}_{22}\text{NO}_8\text{S}_3^+$  [ $\text{M}+\text{H}$ ] $^+$  692.0502, found 692.0510.

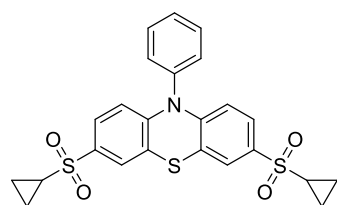

**4r:** 96% yield, 92.7 mg, yellow solid, m.p. 95-96 °C. Purification by flash column chromatography (eluent: EtOAc/Petroleum ether = 1/5-1/1.5).  $^1\text{H}$  NMR (400 MHz,  $\text{CDCl}_3$ )  $\delta$  7.70-7.65 (m, 2H), 7.60-7.55 (m, 1H), 7.42 (d,  $J = 2.4$  Hz, 2H), 7.38-7.31 (m, 2H), 7.28 (dd,  $J = 8.8, 2.0$  Hz, 2H), 6.18 (d,  $J = 8.4$  Hz, 2H), 2.42-2.34 (m, 2H), 1.28-1.22 (m, 4H), 1.03-0.95 (m, 4H);  $^{13}\text{C}$  NMR (100 MHz,  $\text{CDCl}_3$ )  $\delta$  147.1, 138.9, 135.1, 131.7, 130.3, 129.8, 127.2, 125.8, 120.0, 116.0, 33.1, 6.0. FT-IR:  $\nu$  ( $\text{cm}^{-1}$ ) 2922, 2853, 1585, 1562, 1492, 1458, 1393, 1306, 1288, 1103, 1071, 904, 719, 660. HRMS [ESI] calcd for  $\text{C}_{24}\text{H}_{22}\text{NO}_4\text{S}_3^+$  [ $\text{M}+\text{H}$ ] $^+$  484.0705, found 484.0705.



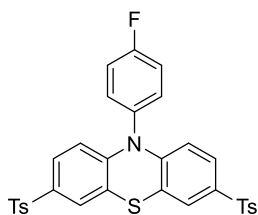

**4s:** 80% yield, 96.0 mg, yellow solid, m.p. 145-146 °C. Purification by flash column chromatography (eluent: EtOAc/Petroleum ether = 1/10-1/5).  $^1\text{H}$  NMR (400 MHz,  $\text{CDCl}_3$ )  $\delta$  7.75 (d,  $J = 8.4$  Hz, 4H), 7.47-7.44 (m, 2H), 7.37 (dd,  $J = 8.4$ , 2.4 Hz, 2H), 7.34-7.31 (m, 2H), 7.30-7.27 (m, 6H), 6.12 (d,  $J = 8.4$  Hz, 2H), 2.39 (s, 6H);  $^{13}\text{C}$  NMR (100 MHz,  $\text{CDCl}_3$ )  $\delta$  162.7 (d,  $J_{\text{C-F}} = 249.7$  Hz), 146.7, 144.2, 138.7, 136.6, 134.7 (d,  $J_{\text{C-F}} = 3.5$  Hz), 132.3 (d,  $J_{\text{C-F}} = 8.6$  Hz), 130.0, 127.4, 127.2, 125.8, 120.3, 118.7 (d,  $J_{\text{C-F}} = 22.7$  Hz), 115.9, 21.6;  $^{19}\text{F}$  NMR (377 MHz,  $\text{CDCl}_3$ )  $\delta$  -109.8 (s). FT-IR:  $\nu$  ( $\text{cm}^{-1}$ ) 3062, 2922, 2856, 1597, 1505, 1243, 1016, 917. HRMS [CI] calcd for  $\text{C}_{32}\text{H}_{24}\text{FNO}_4\text{S}_3$  [M] 601.0851, found 601.0849.

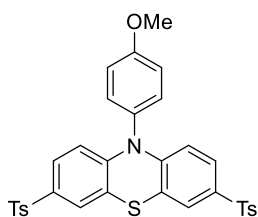

**4t:** 96% yield, 117.7 mg, yellow solid, m.p. 122-123 °C. Purification by flash column chromatography (eluent: EtOAc/Petroleum ether = 1/10-1/5).  $^1\text{H}$  NMR (400 MHz,  $\text{CDCl}_3$ )  $\delta$  7.77-7.72 (m, 4H), 7.43 (d,  $J = 2.0$  Hz, 2H), 7.34 (dd,  $J = 8.8$ , 2.0 Hz, 2H), 7.29-7.26 (m, 4H), 7.17-7.09 (m, 4H), 6.16 (d,  $J = 8.4$  Hz, 2H), 3.88 (s, 3H), 2.38 (s, 6H);  $^{13}\text{C}$  NMR (100 MHz,  $\text{CDCl}_3$ )  $\delta$  160.1, 147.1, 144.1, 138.8, 136.2, 131.2, 131.2, 130.0, 127.4, 127.1, 125.7, 120.0, 116.6, 116.0, 55.7, 21.6. FT-IR:  $\nu$  ( $\text{cm}^{-1}$ ) 3069, 2944, 1596, 1461, 1397, 1190, 971. HRMS [ESI] calcd for  $\text{C}_{33}\text{H}_{28}\text{NO}_5\text{S}_3^+$  [M+H] $^+$  614.1124, found 614.1134.

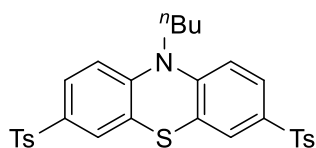

**4u:** 71% yield, 80.0 mg, yellow solid, m.p. 98-99 °C. Purification by flash column chromatography (eluent: EtOAc/Petroleum ether = 1/5).  $^1\text{H}$  NMR (400 MHz,  $\text{CDCl}_3$ )  $\delta$  7.77 (d,  $J = 8.0$  Hz, 4H), 7.69 (dd,  $J = 8.8$ , 2.0 Hz, 2H), 7.53 (d,  $J = 2.4$  Hz, 2H), 7.27 (d,  $J = 6.4$  Hz, 4H), 6.86 (d,  $J = 8.4$  Hz, 2H), 3.82 (t,  $J = 6.8$  Hz, 2H), 2.37 (s, 6H), 1.72-1.64 (m, 2H), 1.43-1.34 (m, 2H), 0.89 (t,  $J = 7.2$  Hz, 3H);  $^{13}\text{C}$  NMR (100 MHz,  $\text{CDCl}_3$ )  $\delta$  148.0, 144.2, 138.8, 136.4, 130.0, 127.5, 127.5, 126.6, 124.9, 115.8, 47.9, 28.5, 21.6, 19.9, 13.6. FT-IR:  $\nu$  ( $\text{cm}^{-1}$ ) 2973, 2892, 1649, 1455, 1319, 1086, 1044. HRMS [EI] calcd for  $\text{C}_{30}\text{H}_{29}\text{NO}_4\text{S}_3^+$  [M] $^+$  563.1253, found 563.1259.

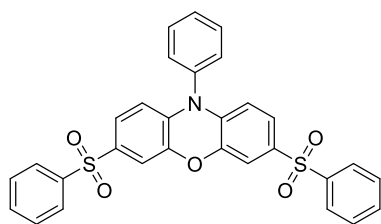

**4v:** 60% yield, 65.2 mg, yellow solid, m.p. 120-121 °C. Purification by flash column chromatography (eluent: EtOAc/Petroleum ether = 1/15-1/10).  $^1\text{H}$  NMR (400 MHz,  $\text{CDCl}_3$ )  $\delta$  7.89-7.84 (m, 4H), 7.64-7.58 (m, 2H), 7.57-7.52 (m, 3H), 7.51-7.45 (m, 4H), 7.23-7.20 (m, 2H), 7.18 (dd,  $J = 8.4$ , 2.0 Hz, 2H), 7.14 (d,  $J = 2.0$  Hz, 2H), 5.89 (d,  $J = 8.4$  Hz, 2H);  $^{13}\text{C}$  NMR (100 MHz,  $\text{CDCl}_3$ )  $\delta$  143.6, 141.8, 137.4, 136.4, 134.8, 133.1, 131.8, 129.9, 129.6, 129.3, 127.3, 124.4, 114.8, 113.8. FT-IR:  $\nu$  ( $\text{cm}^{-1}$ ) 2996, 2924, 1622, 1572, 1483, 1343, 1204, 933. HRMS [ESI] calcd for  $\text{C}_{30}\text{H}_{21}\text{NNaO}_5\text{S}_2^+$  [M+Na] $^+$  562.0753, found 562.0760.

#### 4. Light on/off experiments

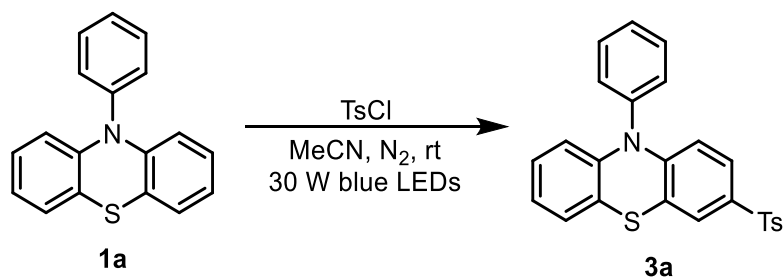

| On/ Off | On | On  | Off | On  | Off | On  | Off |
|---------|----|-----|-----|-----|-----|-----|-----|
| Time/ h | 0  | 2   | 4   | 6   | 8   | 10  | 12  |
| Yield   | 0  | 12% | 12% | 22% | 22% | 42% | 42% |

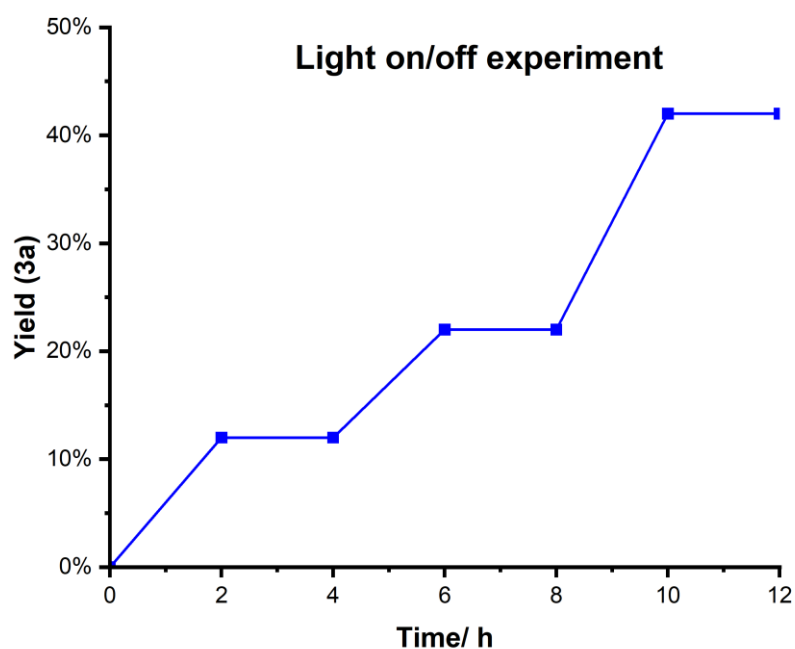

Figure S1 Light on/off experiments

#### 5. UV-Vis absorption and photoluminescence spectroscopy of 3a and 4a

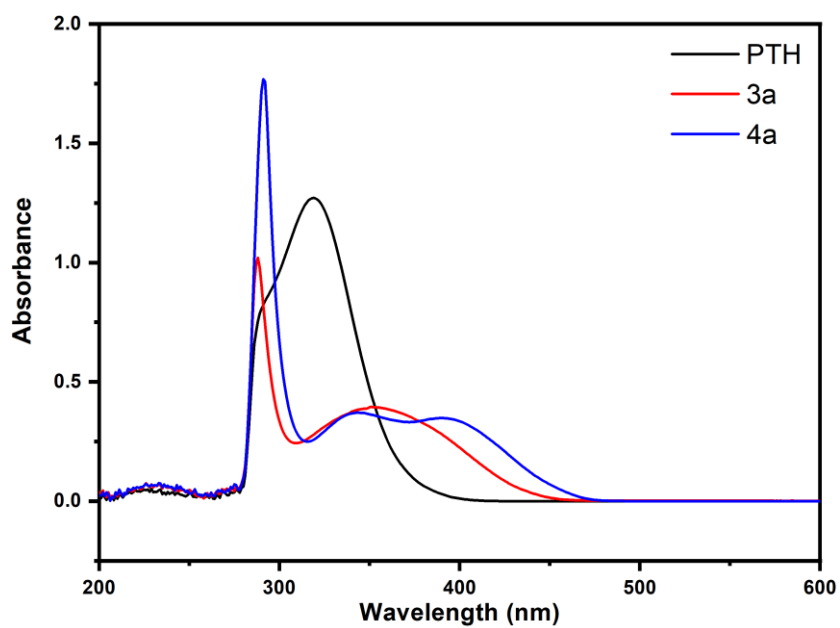

**Figure S2** UV-Vis absorption spectroscopy of **3a** and **4a** in MeCN

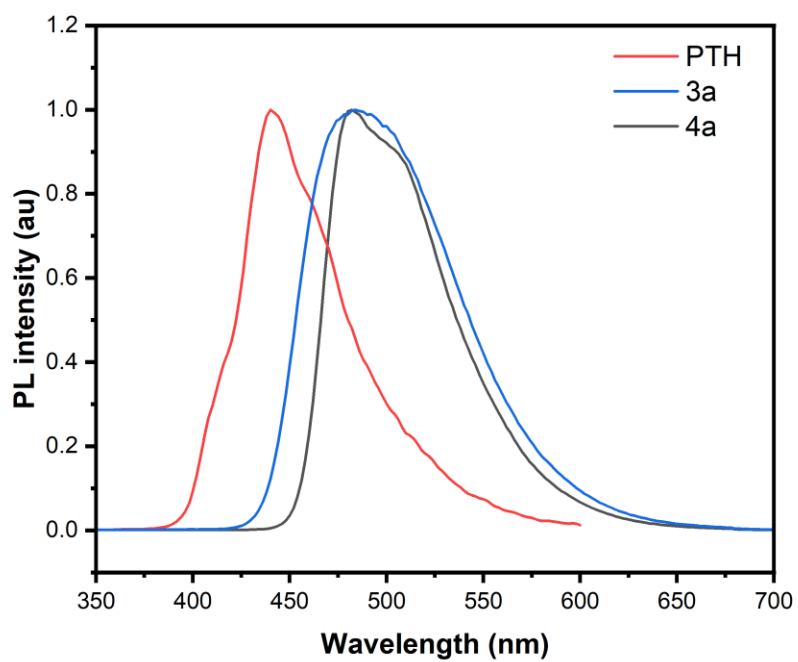

**Figure S3** Photoluminescence spectroscopy of **3a** and **4a** in MeCN

## 6. Mechanistic experiments

### 6.1 Crossover experiment

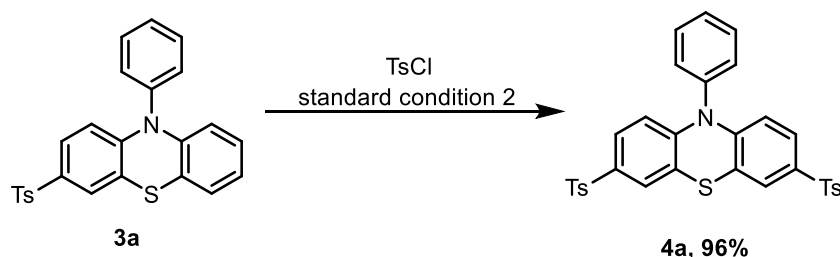

**3a** (0.2 mmol) and TsCl (0.8 mmol) were loaded in a flask, which was subjected to evacuation/ flushing with N<sub>2</sub> for 3 times. MeCN (1.0 mL) was added to the mixture via syringe, which was irradiated by 30 W blue LEDs (450 nm wavelength) and stirred at rt for 48 h. The mixture was concentrated in vacuo, and purified by flash column chromatography on silica gel (eluent: ethyl acetate/petroleum ether) to give **4a**.

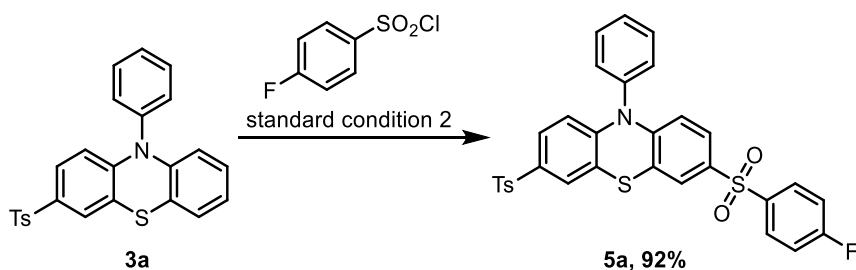

**3a** (0.2 mmol) and 4-fluorobenzenesulfonyl chloride (0.8 mmol) were loaded in a flask, which was subjected to evacuation/ flushing with N<sub>2</sub> for 3 times. MeCN (1.0 mL) was added to the mixture via syringe, which was irradiated by 30 W blue LEDs (450 nm wavelength) and stirred at rt for 48 h. The mixture was concentrated in vacuo, and purified by flash column chromatography on silica gel (eluent: ethyl acetate/petroleum ether) to give **5a**.

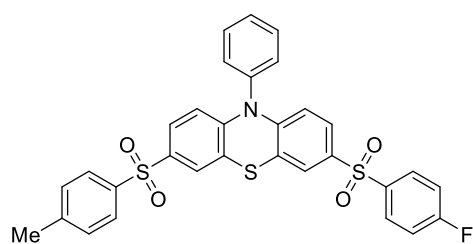

**5a**: 92% yield, 108.0 mg, yellow solid, m.p. 126-127 °C. Purification by flash column chromatography (eluent: EtOAc/Petroleum ether = 1/10-1/6). <sup>1</sup>H NMR (400 MHz, CDCl<sub>3</sub>) δ 7.90-7.82 (m, 2H), 7.73 (d, *J* = 8.4 Hz, 2H), 7.65-7.60 (m, 2H), 7.56-7.52 (m, 1H), 7.45-7.40 (m, 2H), 7.34-7.29 (m, 2H), 7.26-7.22 (m, 4H), 7.17-7.10 (m, 2H), 6.10 (dd, *J* = 8.8, 4.0 Hz, 2H), 2.36 (s, 3H); <sup>13</sup>C NMR (100 MHz, CDCl<sub>3</sub>) δ 165.4 (d, *J*<sub>C-F</sub> = 254.3 Hz), 147.0, 146.6, 144.2, 138.8, 138.7, 137.8 (d, *J*<sub>C-F</sub> = 3.2 Hz), 136.5, 135.7, 131.6, 130.3, 130.2, 130.2, 130.0, 129.8, 127.4, 127.3, 127.2, 125.7 (d, *J*<sub>C-F</sub> = 3.1 Hz), 120.3, 120.0, 116.3 (d, *J*<sub>C-F</sub> = 22.6 Hz), 116.1, 116.1, 21.6. FT-IR: ν (cm<sup>-1</sup>) 3100, 3064, 2923, 1586, 1456, 1303, 1150, 1016, 938. HRMS [ESI] calcd for C<sub>31</sub>H<sub>22</sub>FNNaO<sub>4</sub>S<sub>3</sub><sup>+</sup> [M+Na]<sup>+</sup> 610.0587, found 610.0585.

## 6.2 Fluorescence quenching experiments (Stern–Volmer studies)

Emission intensities were recorded using a FLS980 (Edinburgh Instrument, UK) luminescence spectrophotometer. All PTH solutions were excited at 340 nm and the emission intensity was collected at 442 nm. In a typical experiment, to a  $3 \cdot 10^{-3}$  M solution of PTH in MeCN was added the appropriate amount of a quencher TsCl in a screw-top quartz cuvette. After degassing the sample with a stream of  $N_2$  for 10 minutes, the emission of the sample was collected.

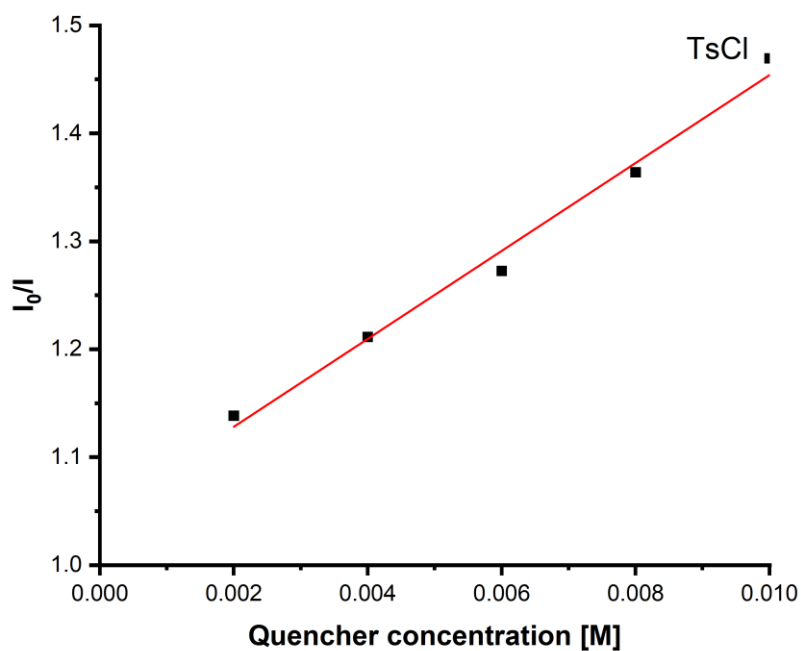

**Fig. S4** Fluorescence quenching experiments

## 6.3 Kinetic experiments

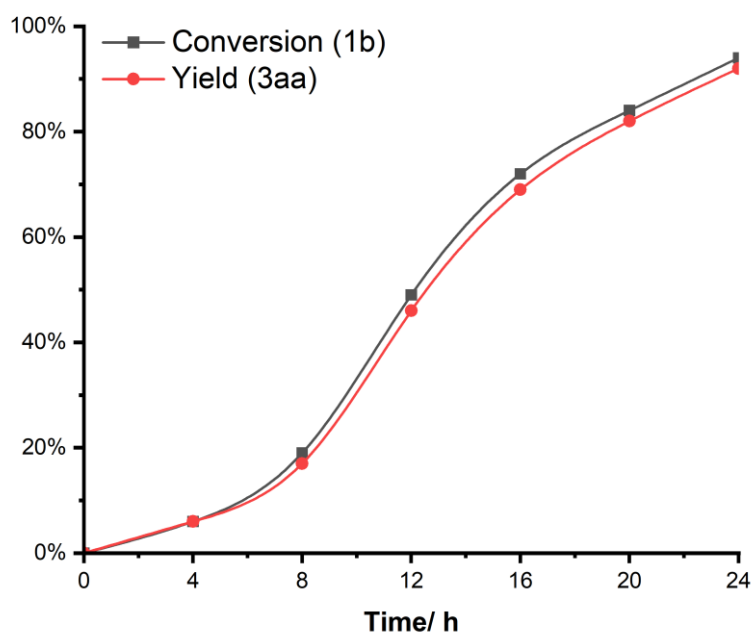

**Fig. S5** Yield-time curve of mono-sulfonylation of **1b**

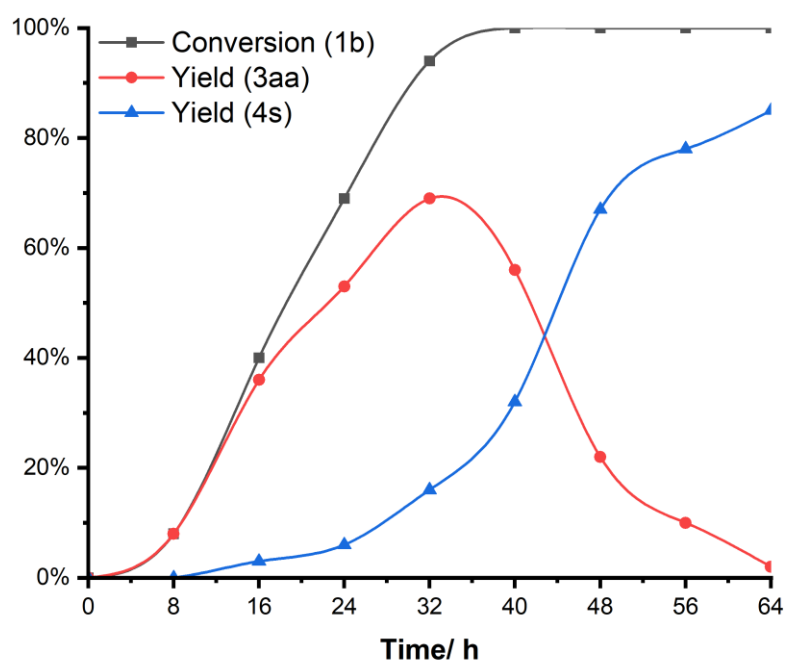

**Fig. S6** Yield-time curve of di-sulfonylation of **1b**

#### 6.4 Cyclic voltammogram of 3a and 4a

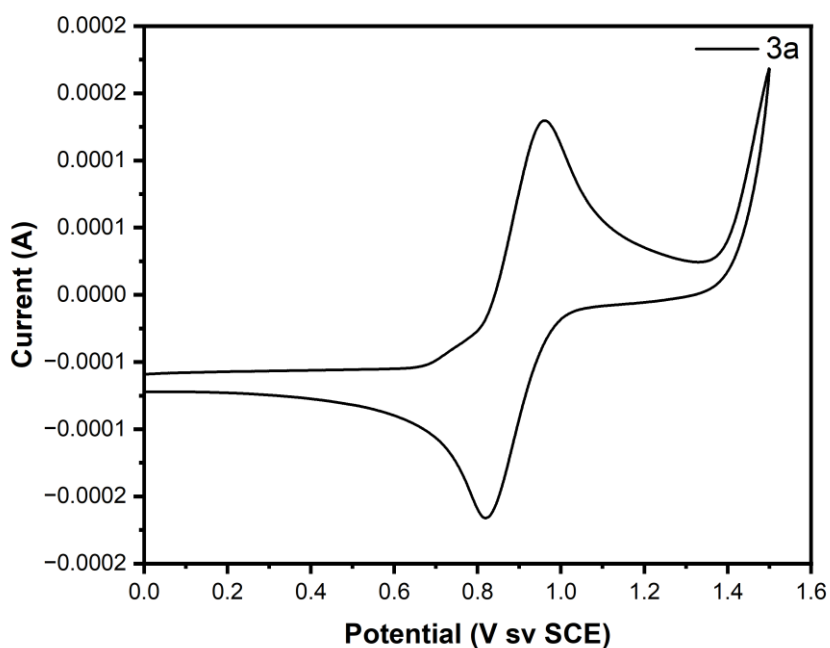

**Fig. S7** Cyclic voltammogram of **3a** vs SCE in MeCN at 0.1 V/s

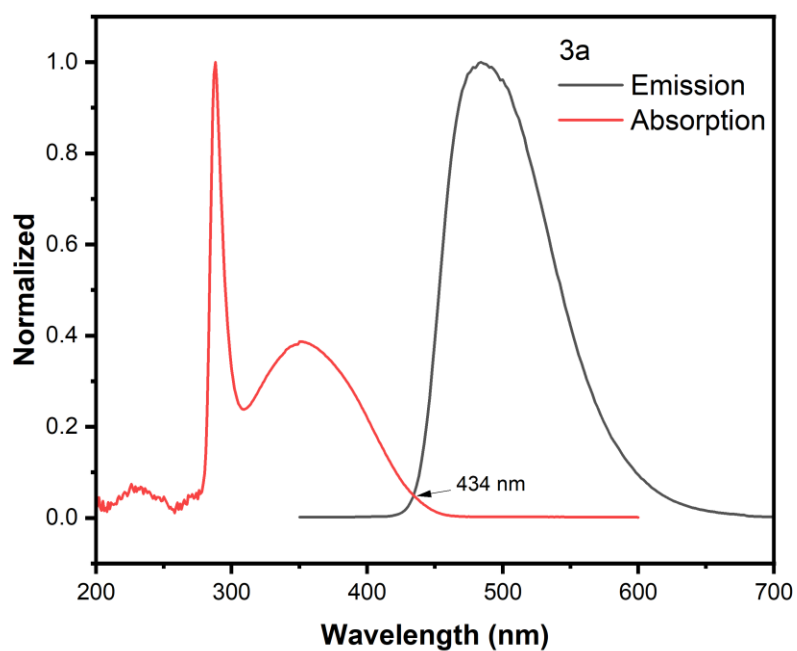

Using the ground state reduction potential of **3a** ( $E_{1/2}(\text{P}^{\bullet+}/\text{P}) = 0.90 \text{ V vs SCE}$ , **Fig. S7**), the excited state oxidation potential for **3a** was estimated from the crossing point of the normalized absorption and emission spectra (433 nm),  $E_{1/2}(\text{P}^*/\text{P}^{\bullet+}) = -1.95 \text{ V vs SCE}$  was obtained.

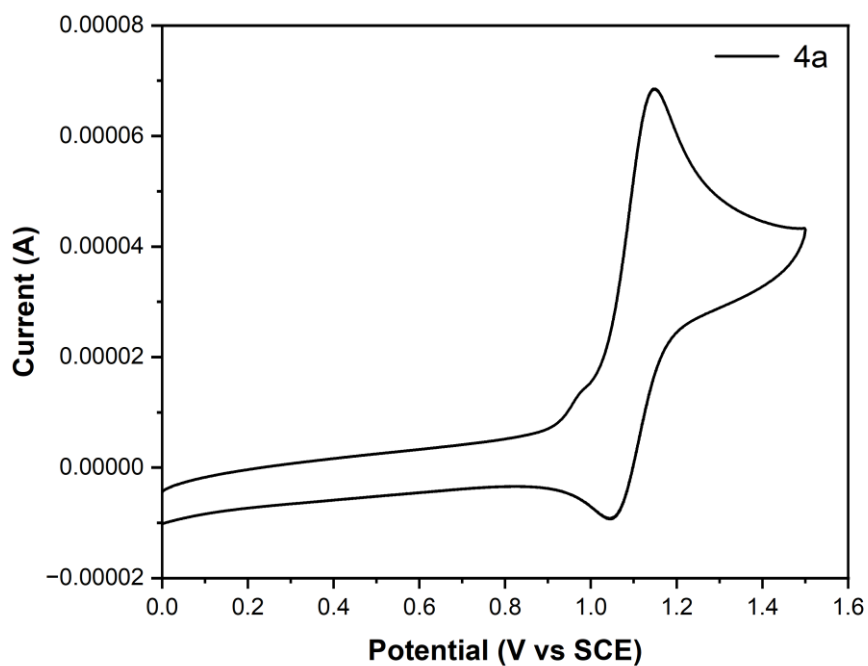

**Fig. S8** Cyclic voltammogram of **4a** vs SCE in MeCN at 0.1 V/s

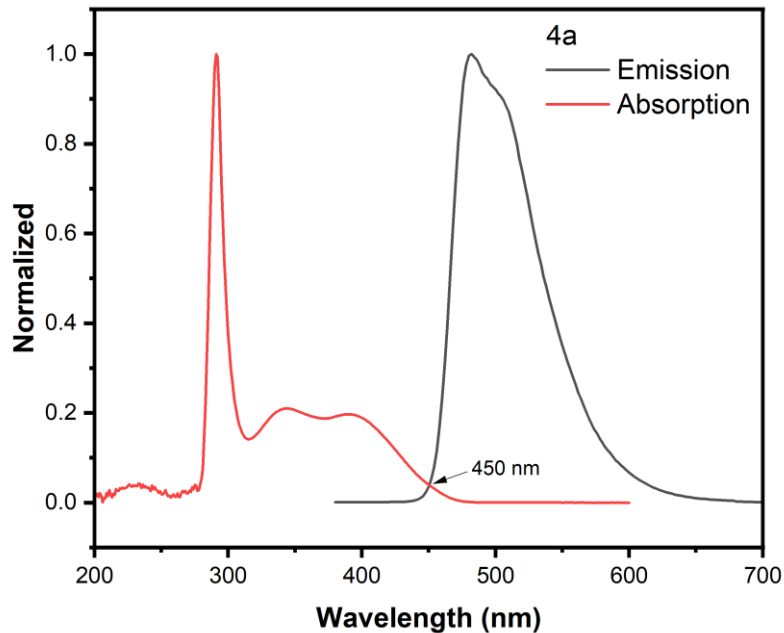

Using the ground state reduction potential of **4a** ( $E_{1/2}(P^{+}/P) = 1.15$  V vs SCE, **Fig. S8**), the excited state oxidation potential for **4a** was estimated from the crossing point of the normalized absorption and emission spectra (450 nm),  $E_{1/2}(P^{*}/P^{+}) = -1.60$  V vs SCE was obtained.



## 6.5 UV-Vis studies

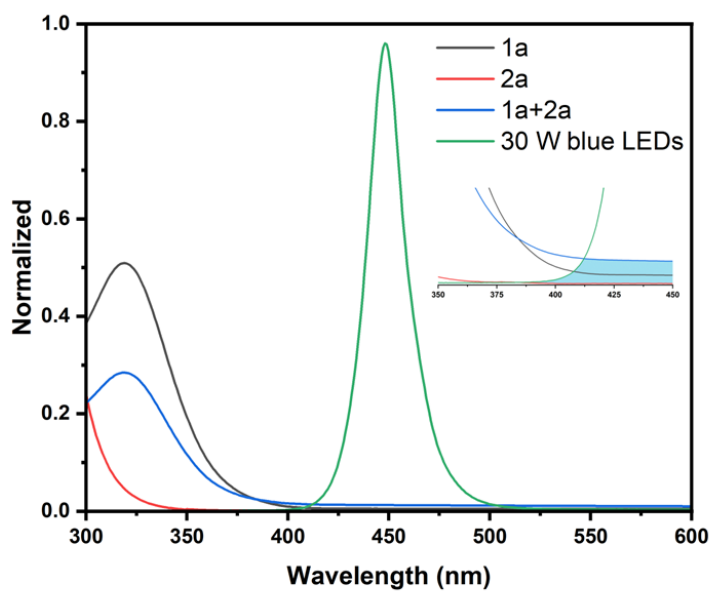

**Figure S9** Absorption spectroscopy of **1a**, **2a** and the mixture of **1a** and **2a** in MeCN, and emission spectroscopy of 30 W blue LED.

## 7. NMR spectra

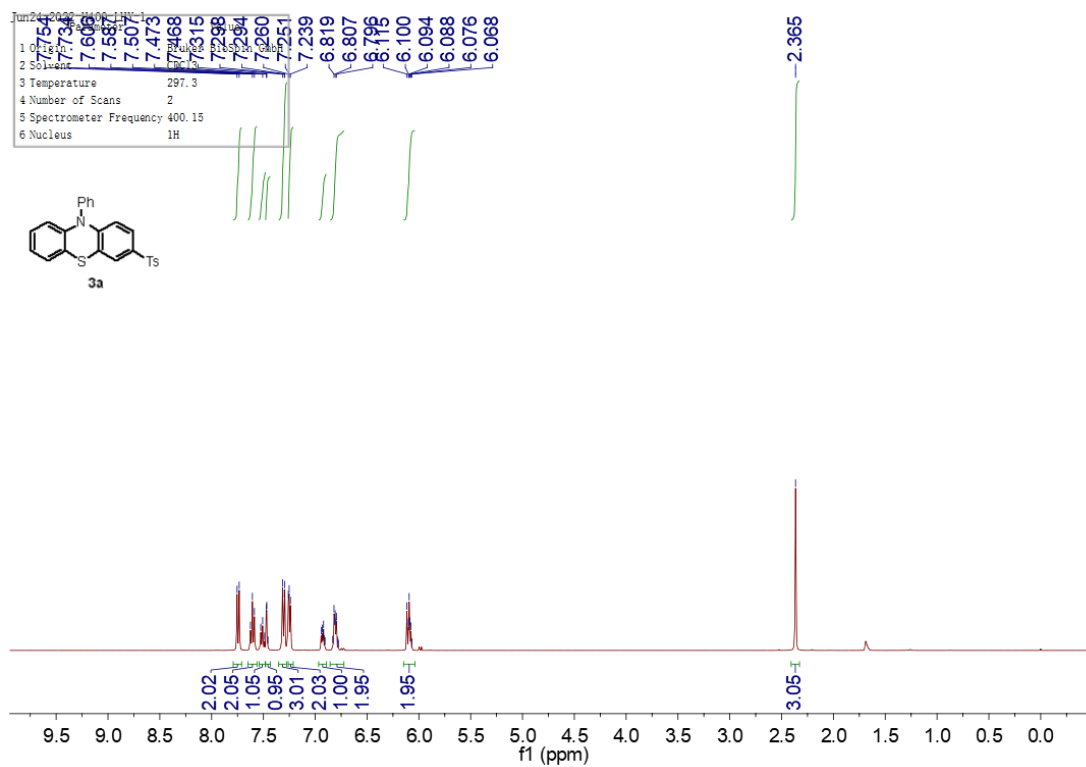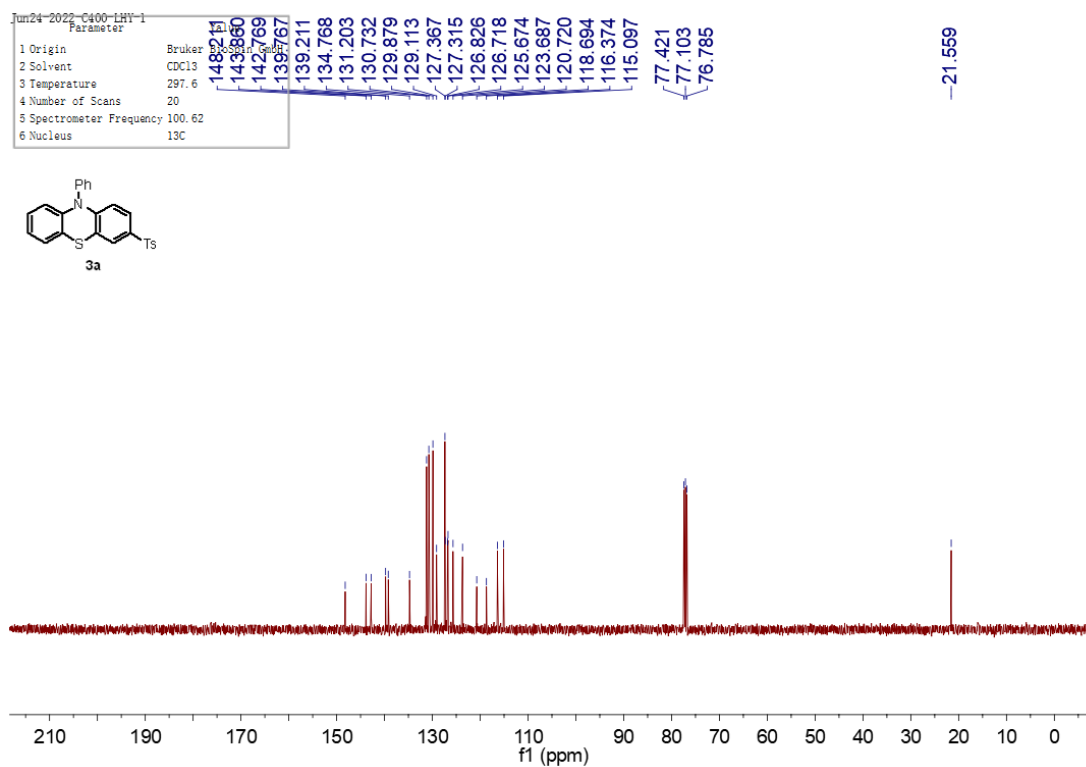

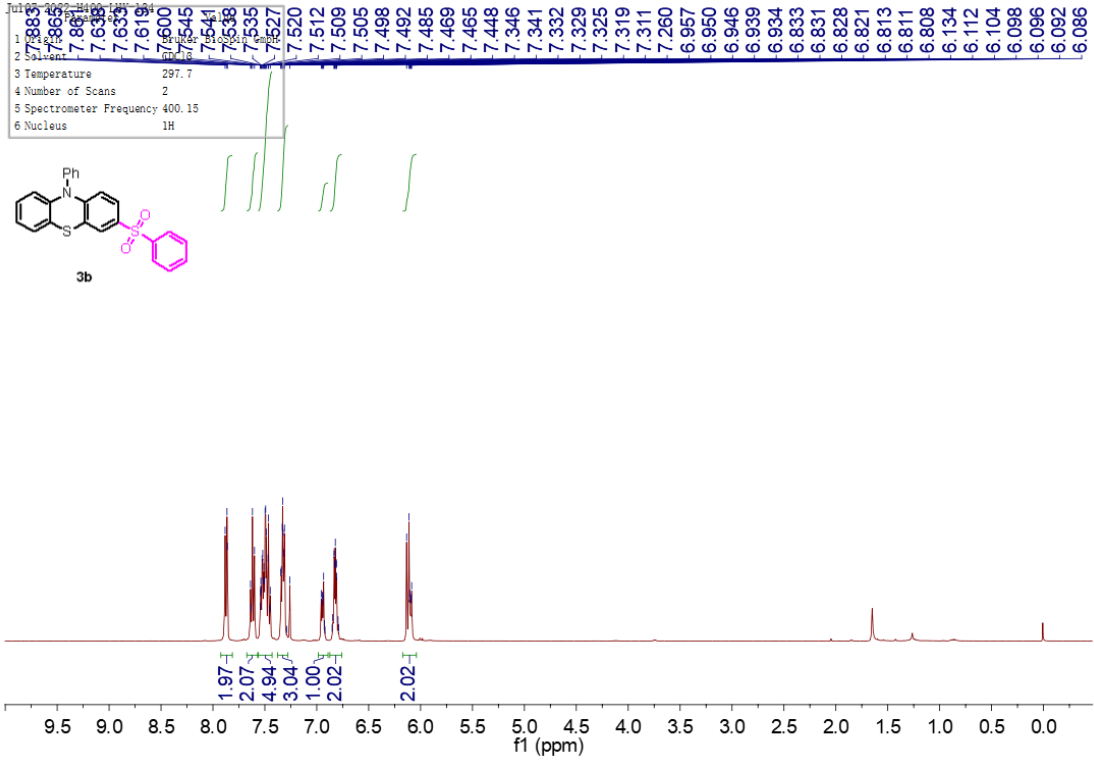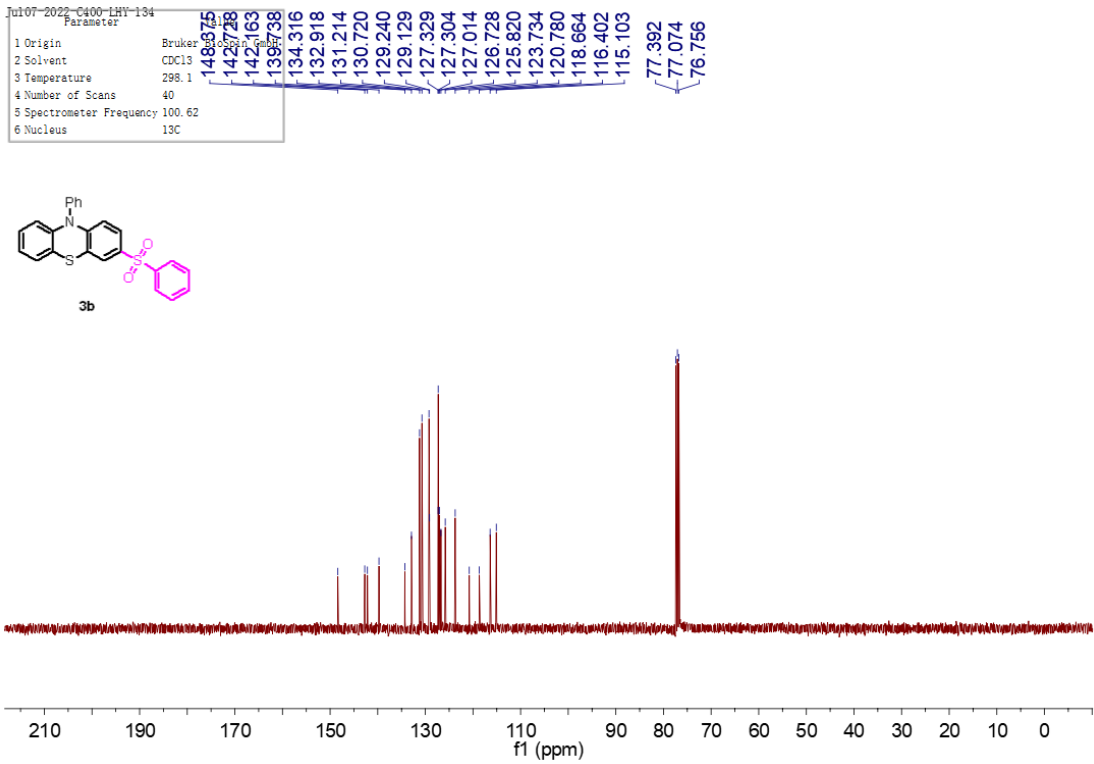

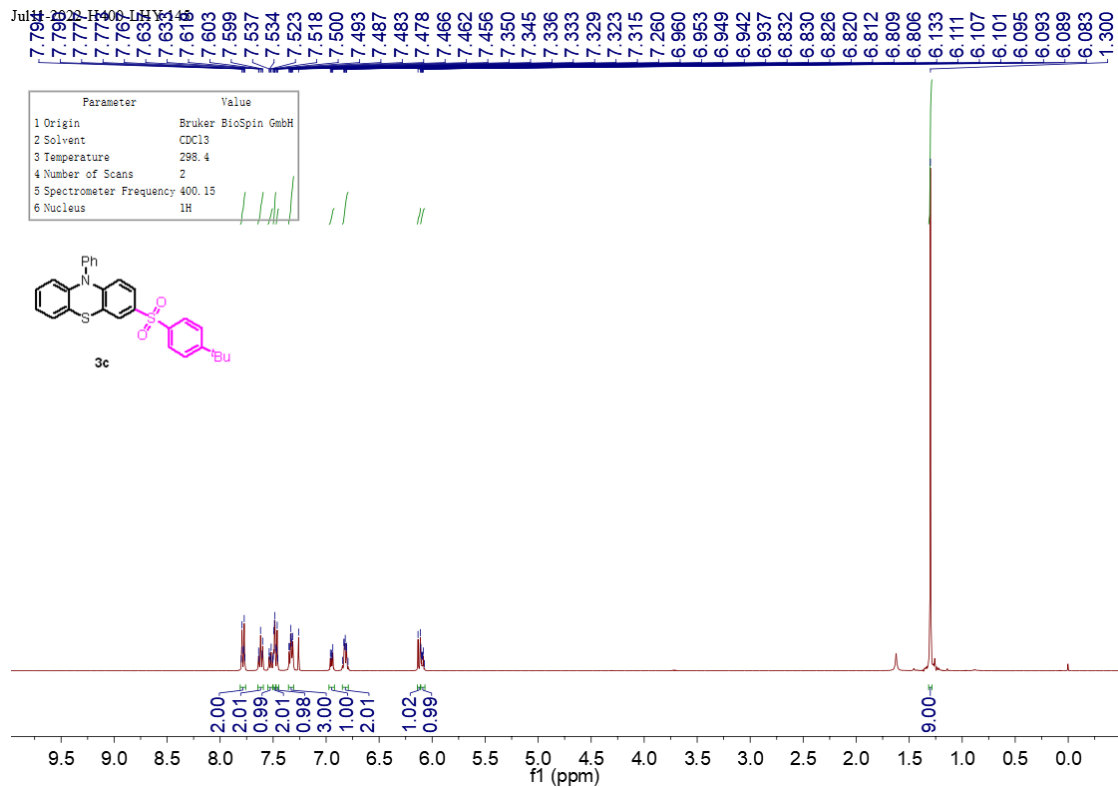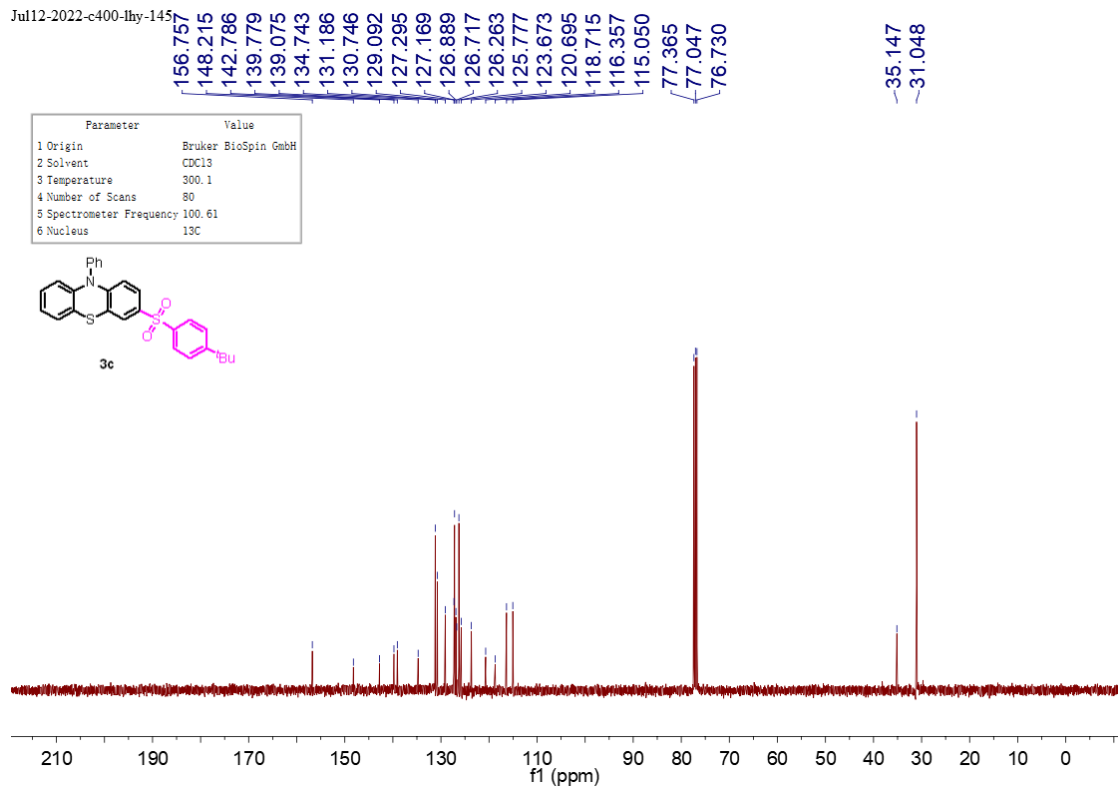

Jul18-2022-C400-1h-18  
 7.945, 7.922, 7.673, 7.664, 7.657, 7.628, 7.608, 7.604, 7.565, 7.561, 7.544, 7.541, 7.538, 7.535, 7.532, 7.526, 7.475, 7.472, 7.454, 7.450, 7.435, 7.418, 7.414, 7.397, 7.387, 7.381, 7.365, 7.359, 7.339, 7.336, 7.331, 7.318, 7.260, 6.965, 6.954, 6.947, 6.942, 6.838, 6.836, 6.833, 6.826, 6.818, 6.816, 6.812, 6.155, 6.133, 6.116, 6.111, 6.105, 6.092

| Parameter                | Value               |
|--------------------------|---------------------|
| 1 Origin                 | Bruker BioSpin GmbH |
| 2 Solvent                | CDCl3               |
| 3 Temperature            | 297.4               |
| 4 Number of Scans        | 2                   |
| 5 Spectrometer Frequency | 400.15              |
| 6 Nucleus                | 1H                  |

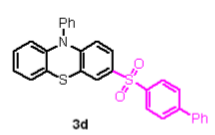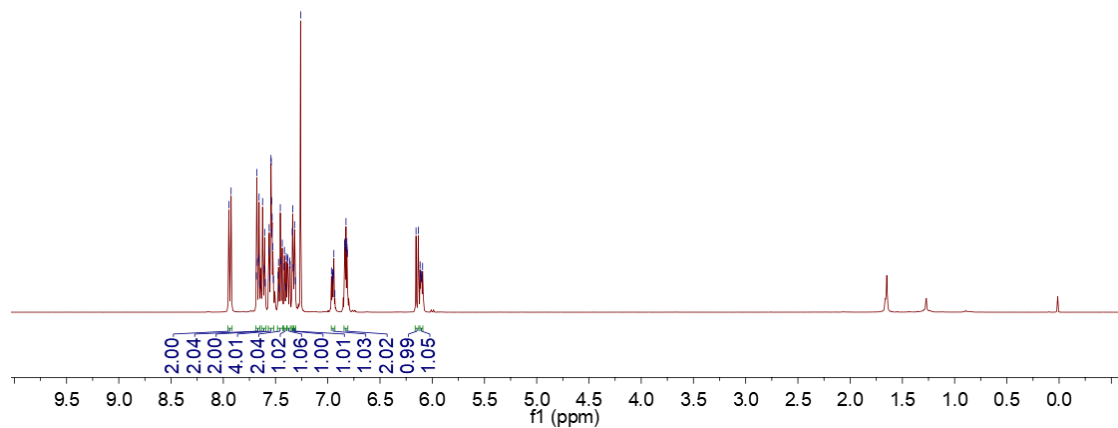

Jul18-2022-C400-1h-18  
 148.386, 145.918, 142.734, 140.701, 139.744, 139.279, 134.451, 131.224, 130.732, 129.137, 129.055, 128.531, 127.918, 127.855, 127.360, 127.338, 126.998, 126.744, 125.800, 123.742, 120.824, 118.673, 116.405, 115.146, 77.405, 77.087, 76.769

| Parameter                | Value               |
|--------------------------|---------------------|
| 1 Origin                 | Bruker BioSpin GmbH |
| 2 Solvent                | CDCl3               |
| 3 Temperature            | 296.9               |
| 4 Number of Scans        | 27                  |
| 5 Spectrometer Frequency | 100.62              |
| 6 Nucleus                | 13C                 |

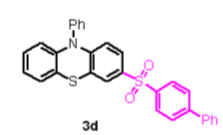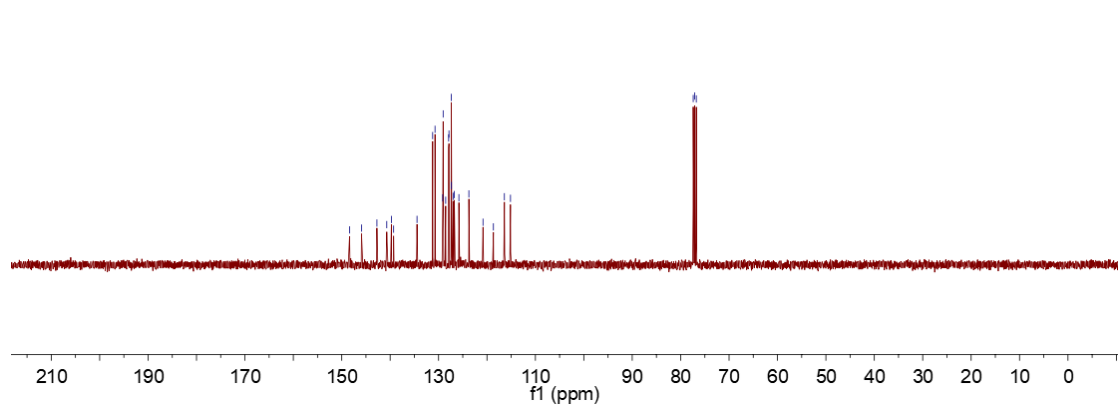

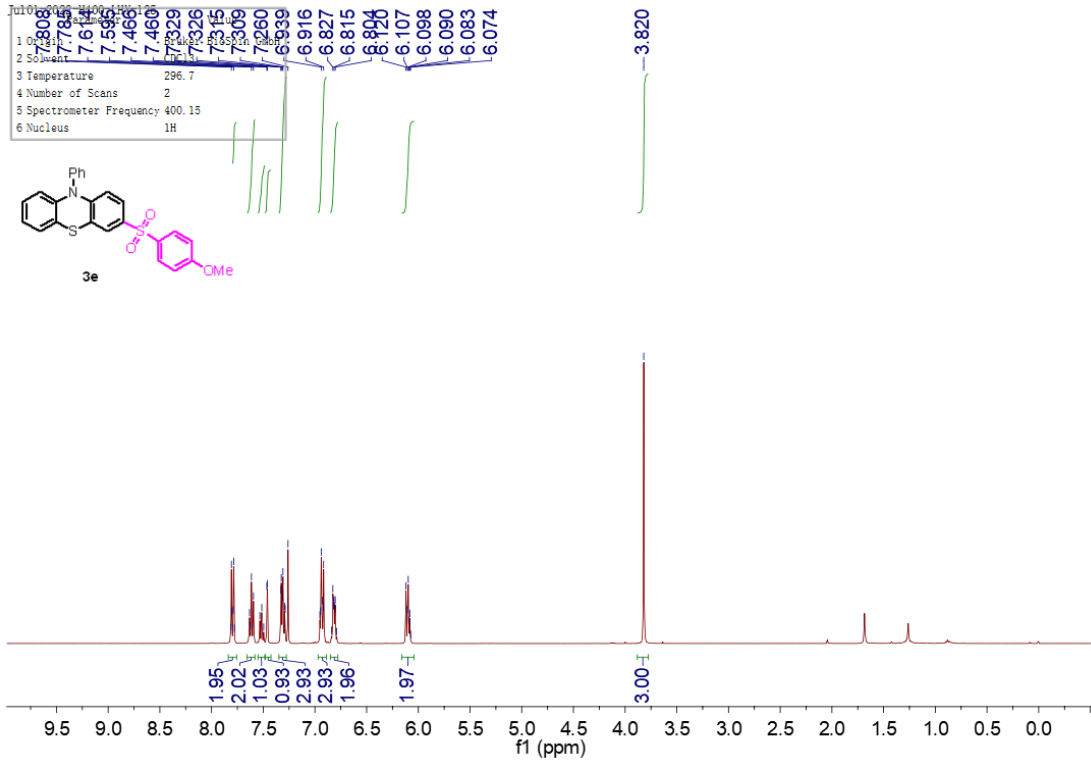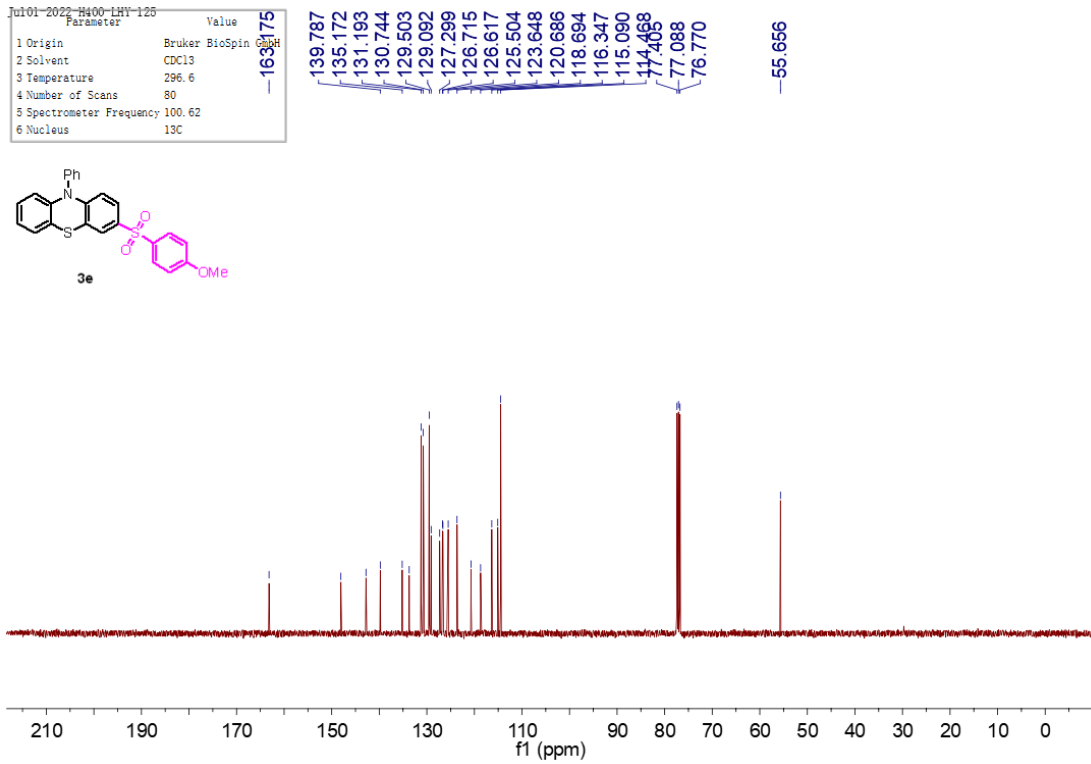

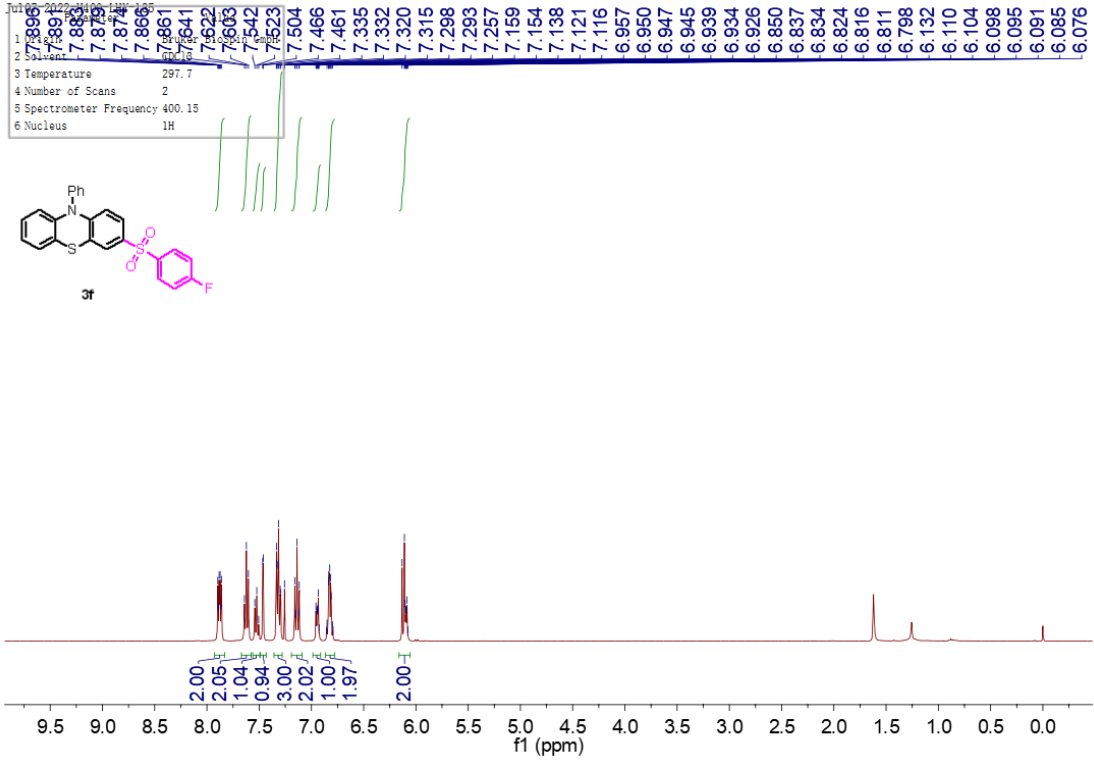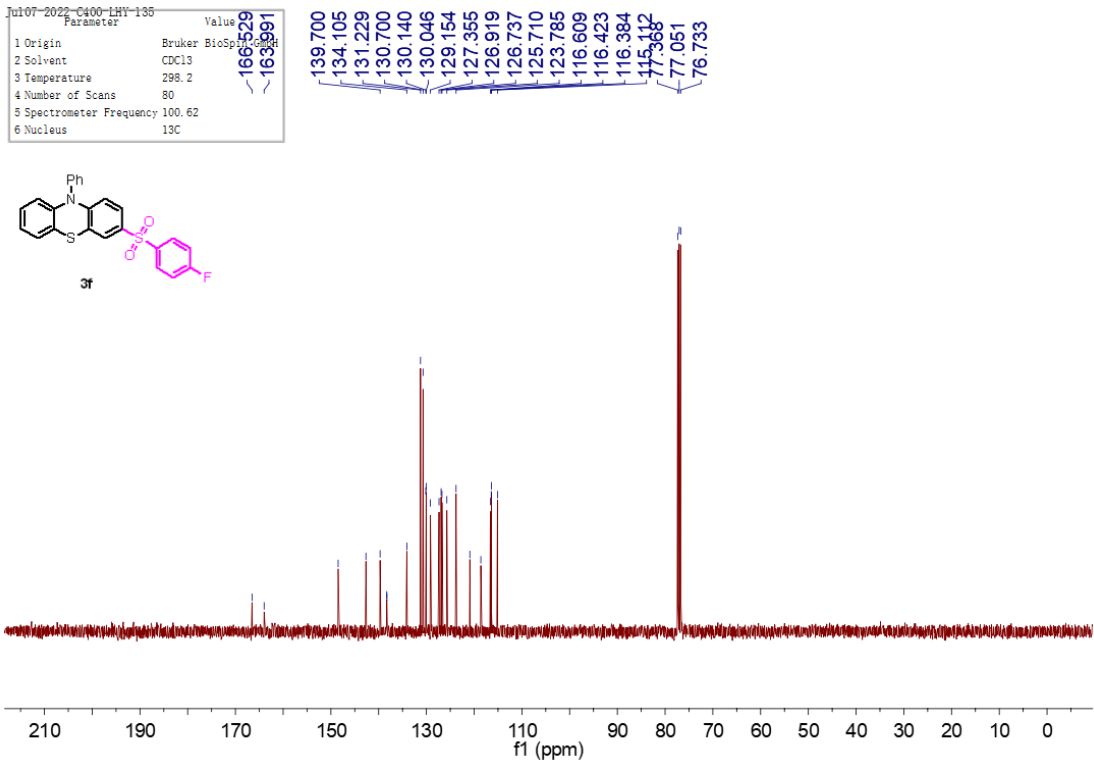

| Jul07-2022-F400-LHY-135  |                     |
|--------------------------|---------------------|
| Parameter                | Value               |
| 1 Origin                 | Bruker BioSpin GmbH |
| 2 Solvent                | CDCl3               |
| 3 Temperature            | 297.8               |
| 4 Number of Scans        | 2                   |
| 5 Spectrometer Frequency | 376.52              |
| 6 Nucleus                | 19F                 |

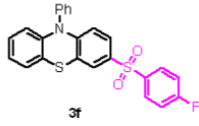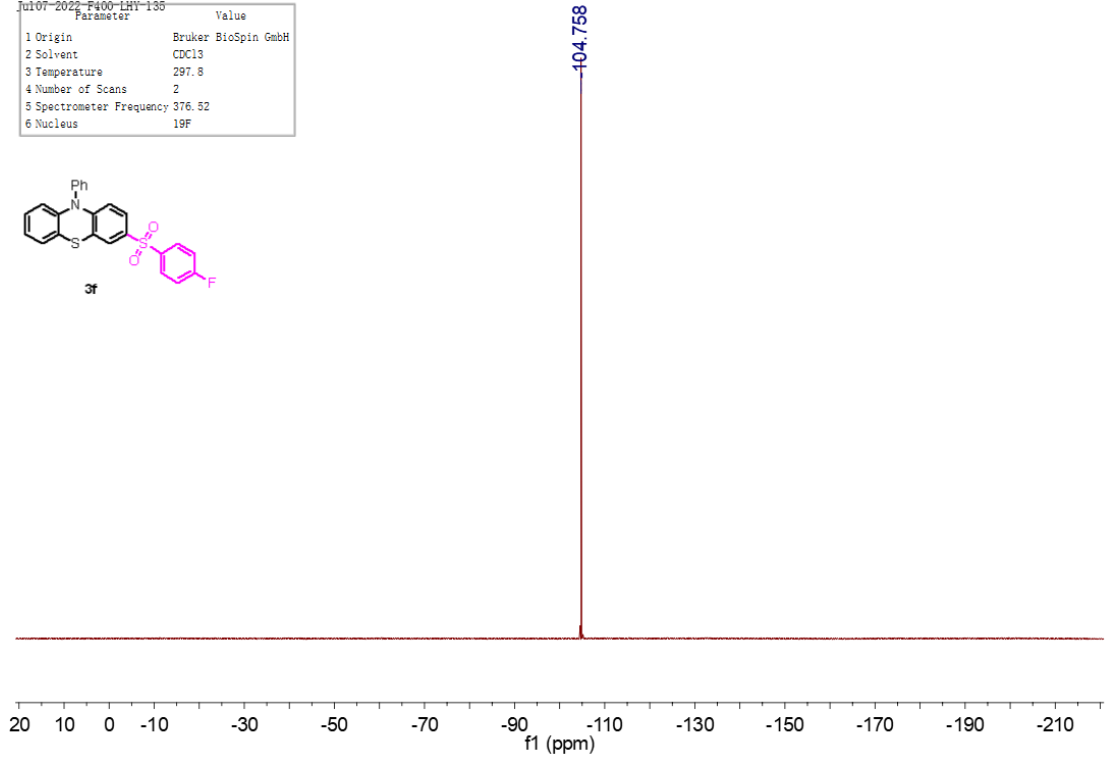

| Jun20-2022-F400-LHY-135  |                     |
|--------------------------|---------------------|
| Parameter                | Value               |
| 1 Origin                 | Bruker BioSpin GmbH |
| 2 Solvent                | CDCl3               |
| 3 Temperature            | 298.1               |
| 4 Number of Scans        | 2                   |
| 5 Spectrometer Frequency | 400.13              |
| 6 Nucleus                | 1H                  |

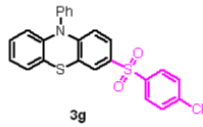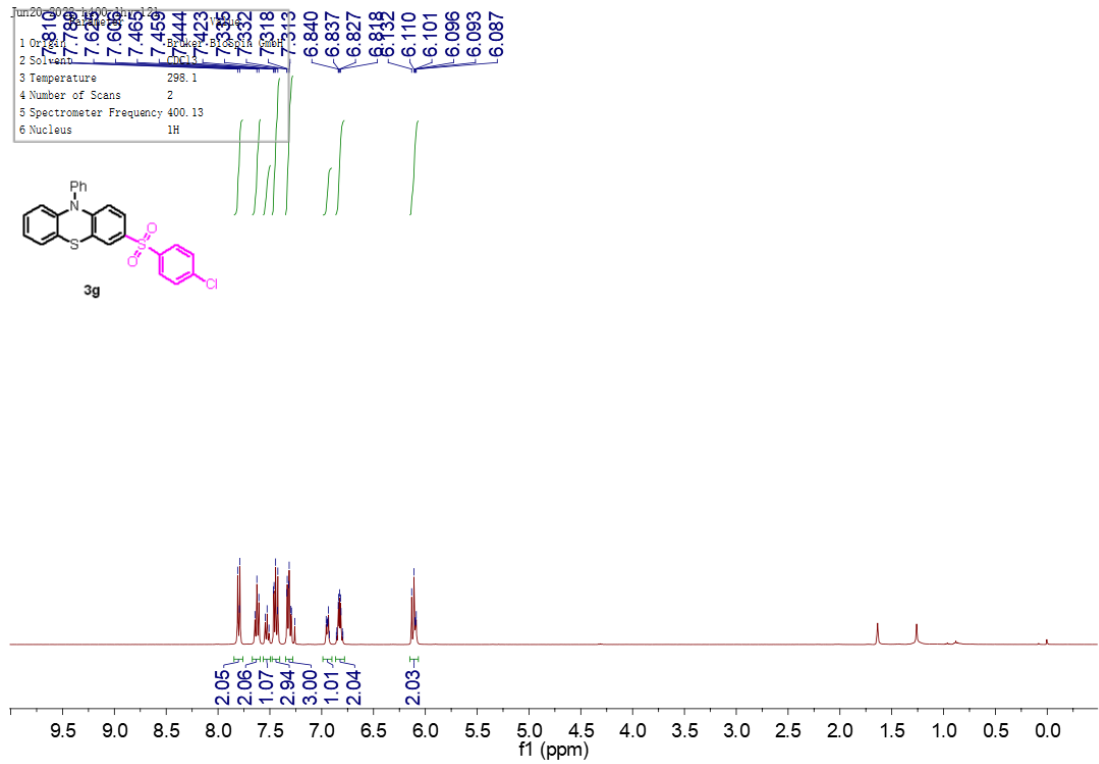



Jun20-2022\_c400-1hy-121

| Parameter                | Value  |
|--------------------------|--------|
| 1 Origin                 | Bruker |
| 2 Solvent                | CDCl3  |
| 3 Temperature            | 298.1  |
| 4 Number of Scans        | 128    |
| 5 Spectrometer Frequency | 100.62 |
| 6 Nucleus                | 13C    |

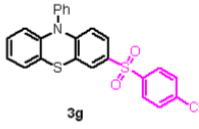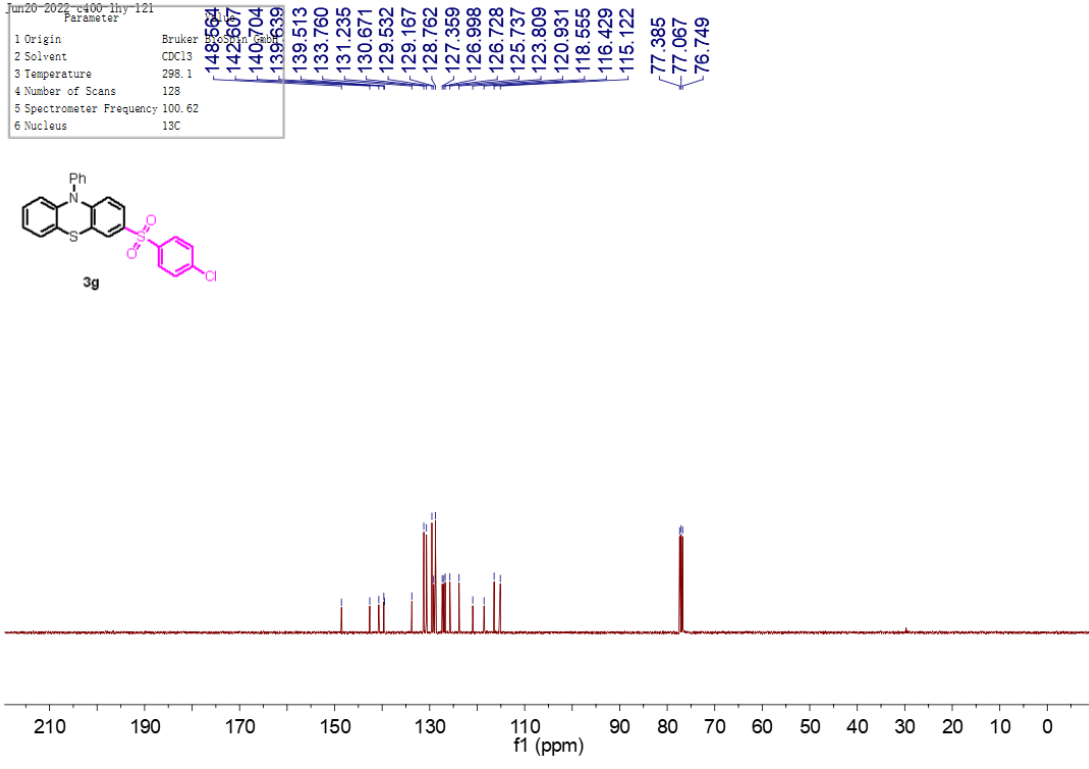

Jun20-2022\_c400-1hy-121

| Parameter                | Value  |
|--------------------------|--------|
| 1 Origin                 | Bruker |
| 2 Solvent                | CDCl3  |
| 3 Temperature            | 298.2  |
| 4 Number of Scans        | 2      |
| 5 Spectrometer Frequency | 400.13 |
| 6 Nucleus                | 1H     |

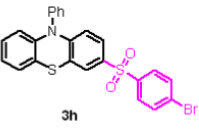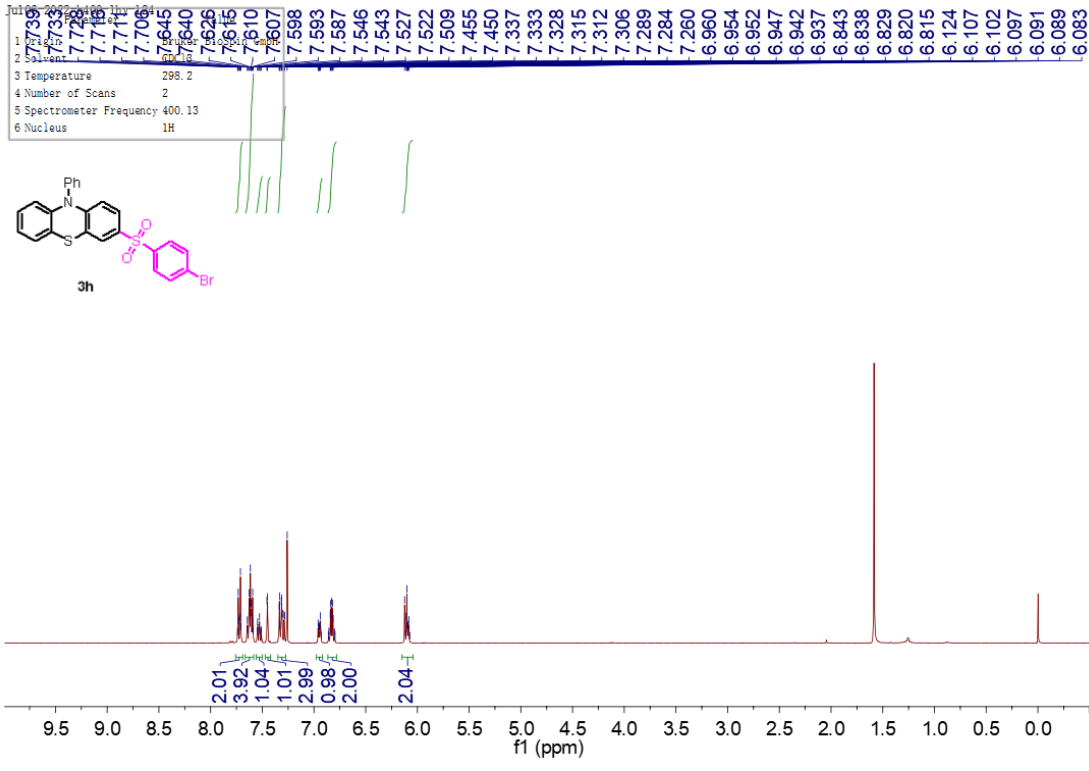

Jui05-2022-c400-lhy-124

| Parameter                | Value  |
|--------------------------|--------|
| 1 Origin                 | Bruker |
| 2 Solvent                | CDCl3  |
| 3 Temperature            | 298.4  |
| 4 Number of Scans        | 258    |
| 5 Spectrometer Frequency | 100.61 |
| 6 Nucleus                | 13C    |

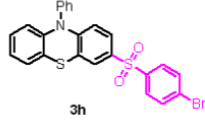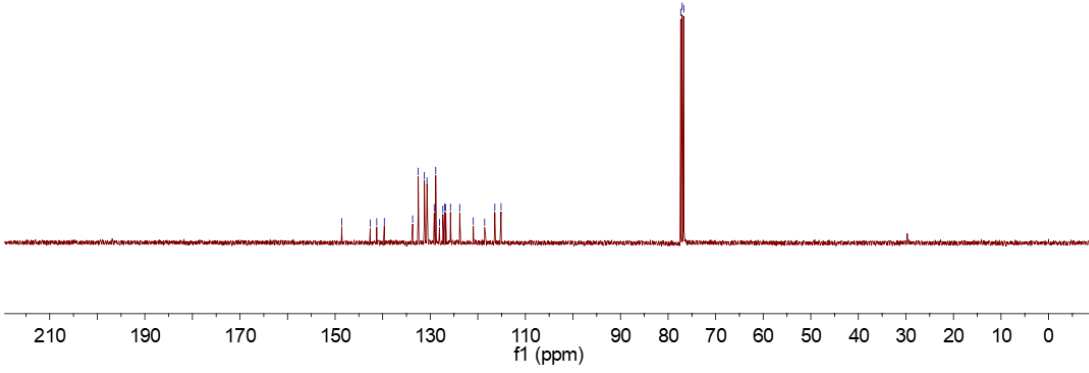

Jui05-2022-c400-lhy-126

| Parameter                | Value  |
|--------------------------|--------|
| 1 Origin                 | Bruker |
| 2 Solvent                | CDCl3  |
| 3 Temperature            | 298.1  |
| 4 Number of Scans        | 2      |
| 5 Spectrometer Frequency | 400.13 |
| 6 Nucleus                | 1H     |

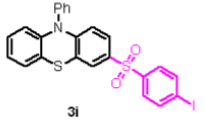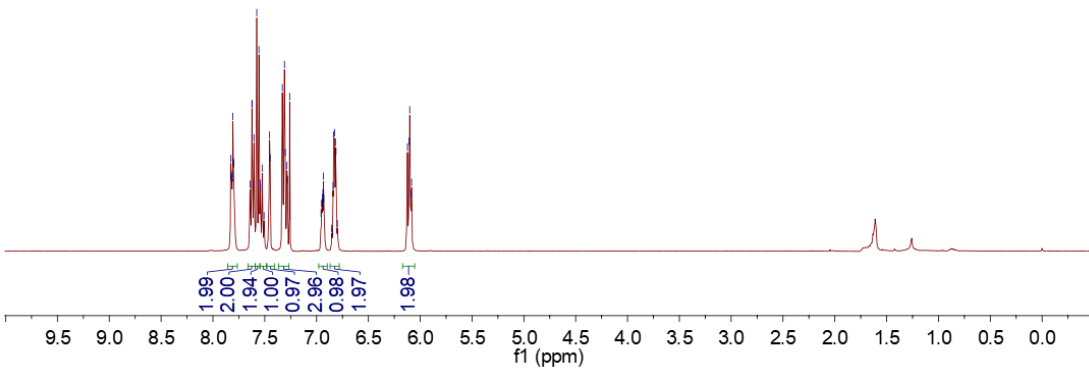

Jul05-2022\_c400-hy-130

| Parameter                | Value               |
|--------------------------|---------------------|
| 1 Origin                 | Bruker BioSpin GmbH |
| 2 Solvent                | CDCl3               |
| 3 Temperature            | 296.6               |
| 4 Number of Scans        | 60                  |
| 5 Spectrometer Frequency | 100.62              |
| 6 Nucleus                | 13C                 |

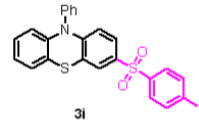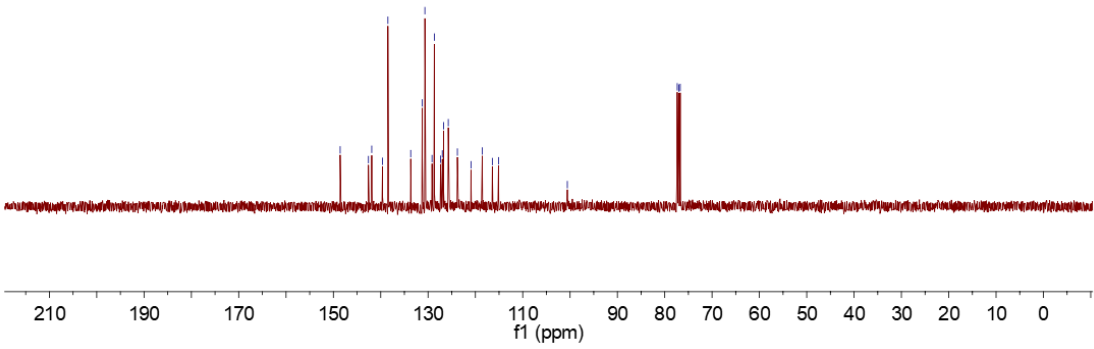

Jul05-2022\_c400-hy-130

| Parameter                | Value               |
|--------------------------|---------------------|
| 1 Origin                 | Bruker BioSpin GmbH |
| 2 Solvent                | CDCl3               |
| 3 Temperature            | 296.6               |
| 4 Number of Scans        | 2                   |
| 5 Spectrometer Frequency | 400.15              |
| 6 Nucleus                | 1H                  |

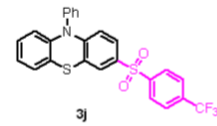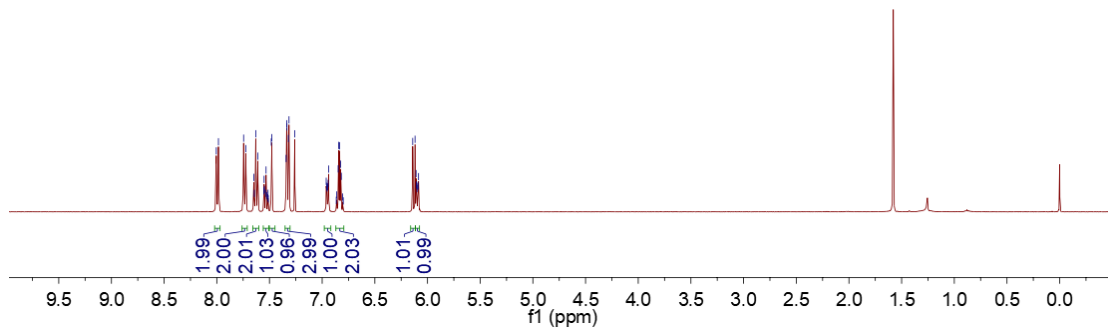

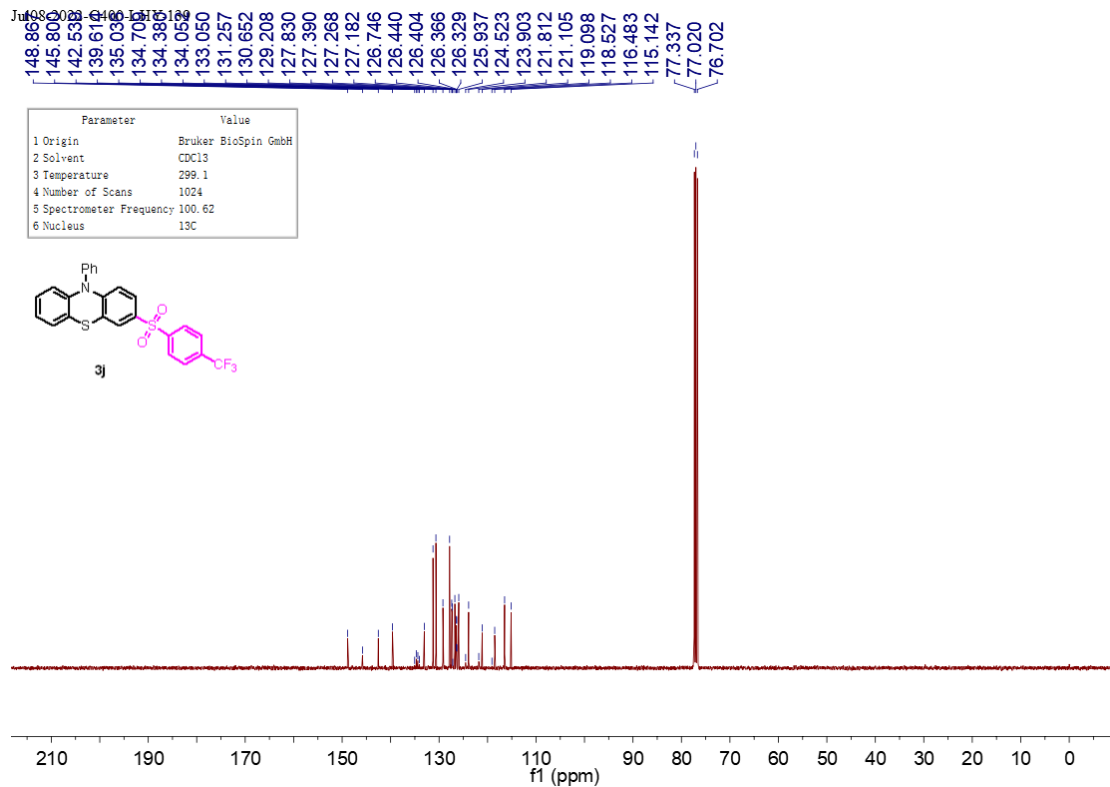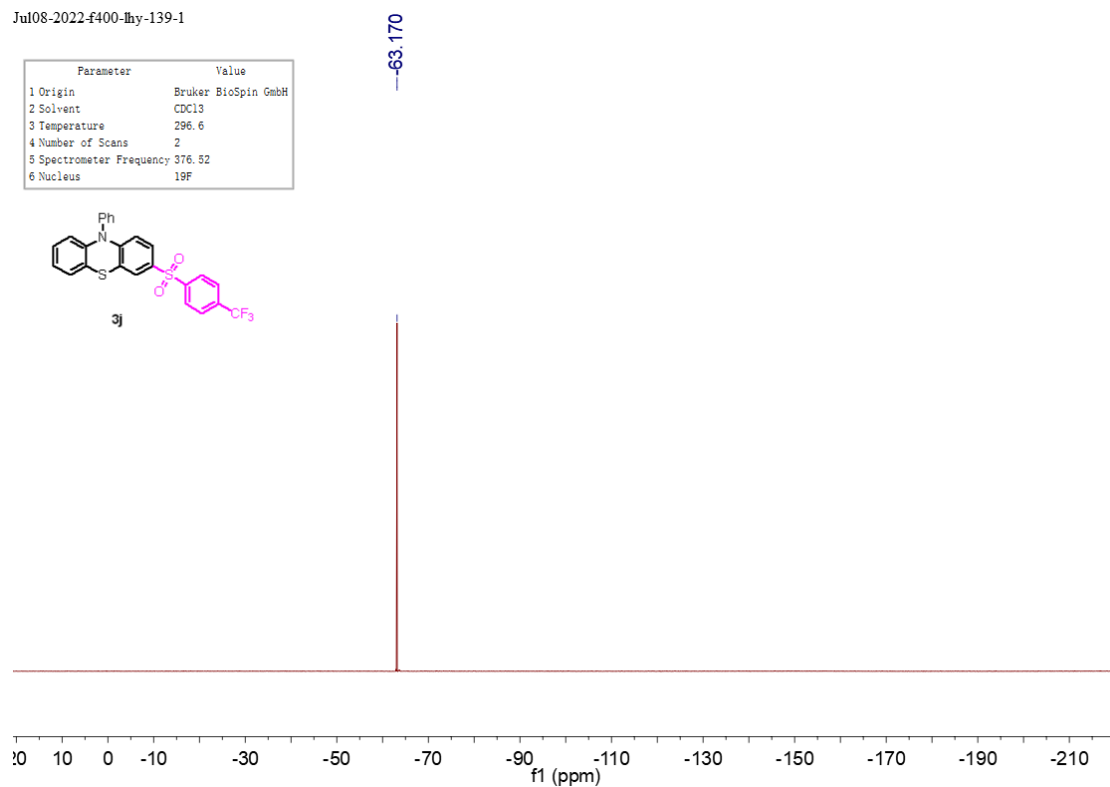

7.941, 7.932, 7.925, 7.916, 7.906, 7.905, 7.647, 7.645, 7.629, 7.613, 7.609, 7.548, 7.545, 7.534, 7.529, 7.525, 7.514, 7.511, 7.487, 7.482, 7.340, 7.335, 7.319, 7.313, 7.304, 7.303, 7.282, 7.260, 6.960, 6.954, 6.951, 6.948, 6.942, 6.937, 6.929, 6.861, 6.856, 6.842, 6.839, 6.829, 6.820, 6.815, 6.802, 6.151, 6.129, 6.118, 6.113, 6.107, 6.103, 6.100, 6.094

| Parameter                | Value               |
|--------------------------|---------------------|
| 1 Origin                 | Bruker BioSpin GmbH |
| 2 Solvent                | CDCl3               |
| 3 Temperature            | 298.5               |
| 4 Number of Scans        | 2                   |
| 5 Spectrometer Frequency | 400.15              |
| 6 Nucleus                | 1H                  |

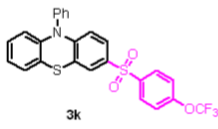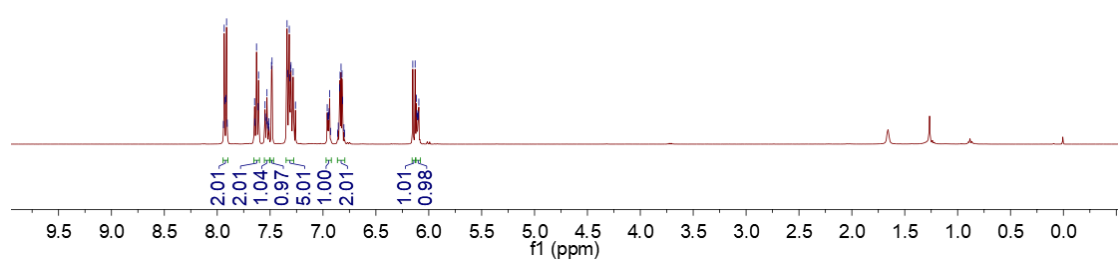

152.311, 152.291, 148.678, 142.620, 140.595, 139.655, 133.628, 131.252, 130.678, 129.505, 129.194, 127.389, 127.088, 126.746, 125.826, 124.068, 123.851, 121.489, 121.102, 121.011, 118.910, 118.564, 116.471, 116.331, 115.153, 77.392, 77.074, 76.757

| Parameter                | Value               |
|--------------------------|---------------------|
| 1 Origin                 | Bruker BioSpin GmbH |
| 2 Solvent                | CDCl3               |
| 3 Temperature            | 298.1               |
| 4 Number of Scans        | 1024                |
| 5 Spectrometer Frequency | 100.62              |
| 6 Nucleus                | 13C                 |

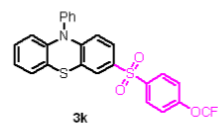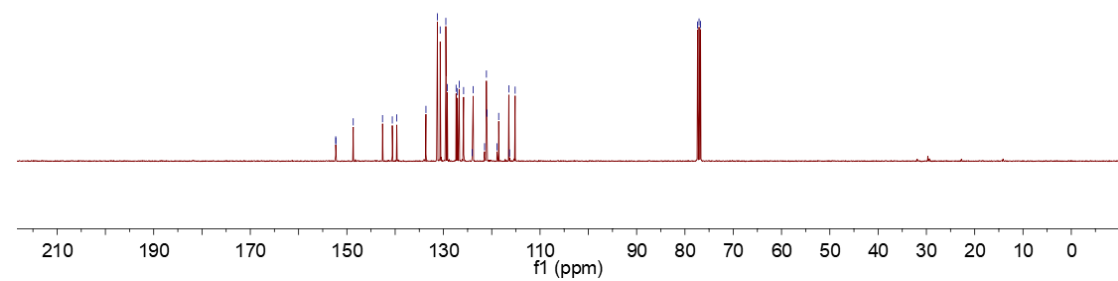

Jul11-2022-F400-LHY-142

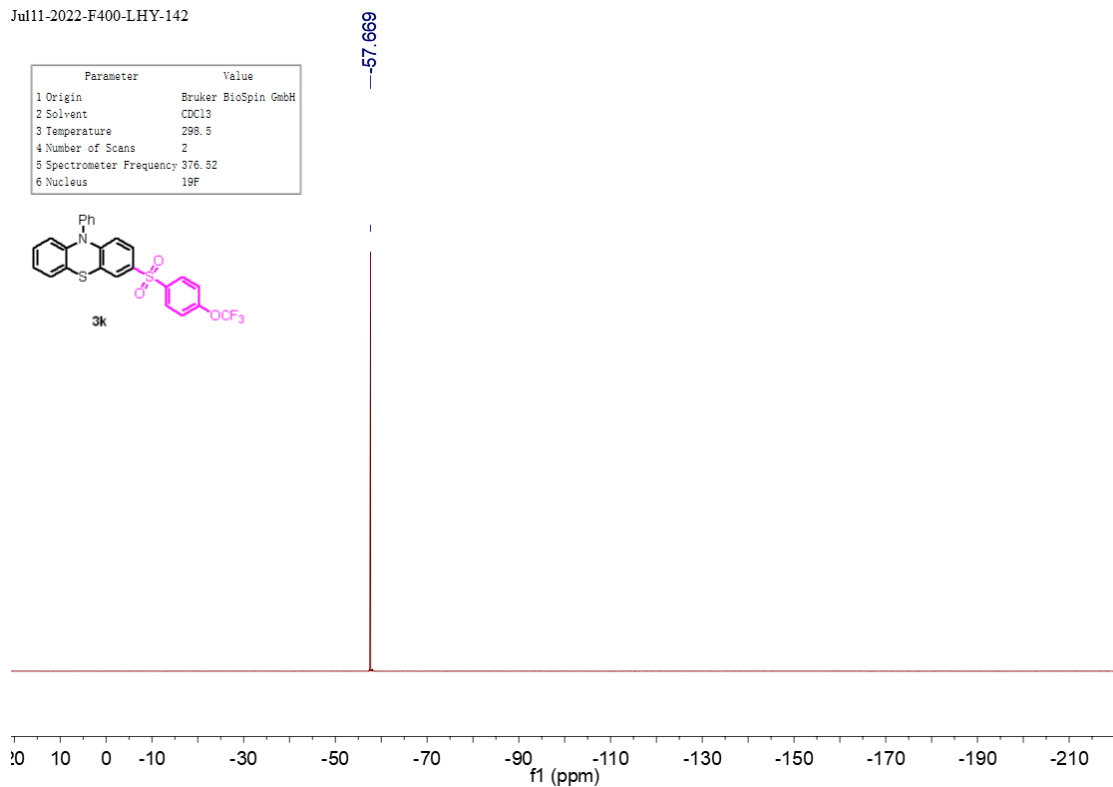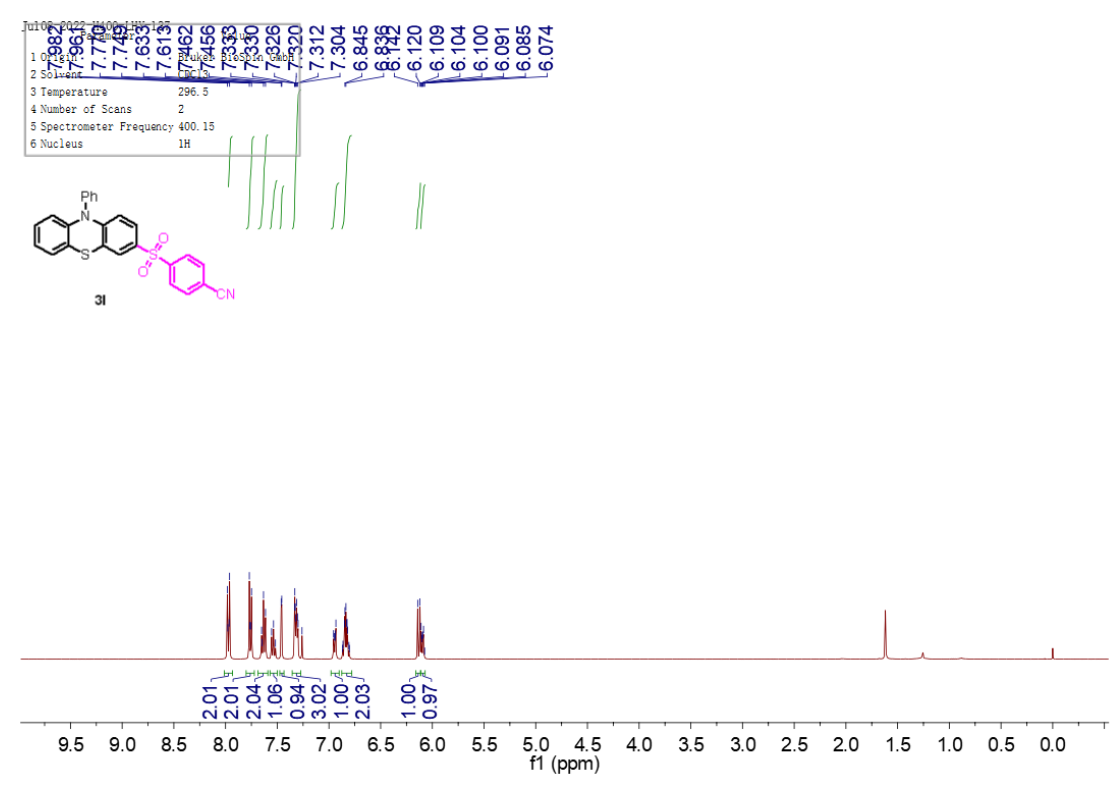

Jul08-2022-H400-LHY-137

Parameter

|                          |                   |
|--------------------------|-------------------|
| 1 Origin                 | Brucker BioSpin   |
| 2 Solvent                | CDCl <sub>3</sub> |
| 3 Temperature            | 296.9             |
| 4 Number of Scans        | 80                |
| 5 Spectrometer Frequency | 100.62            |
| 6 Nucleus                | <sup>13</sup> C   |

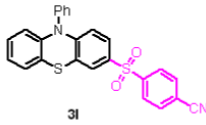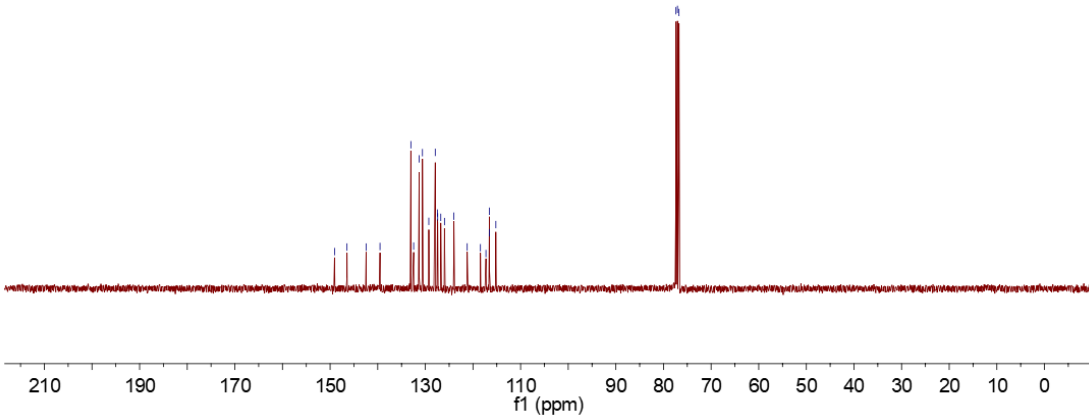

Jul09-2022-H400-LHY-166

Parameter

|                          |                   |
|--------------------------|-------------------|
| 1 Origin                 | Brucker BioSpin   |
| 2 Solvent                | CDCl <sub>3</sub> |
| 3 Temperature            | 298.2             |
| 4 Number of Scans        | 2                 |
| 5 Spectrometer Frequency | 400.13            |
| 6 Nucleus                | <sup>1</sup> H    |

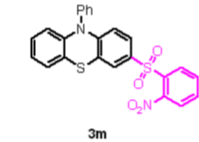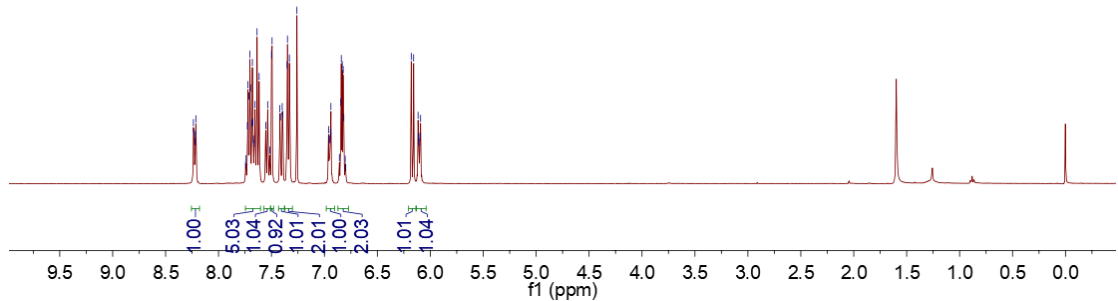

Ju121-2022-c400-lhy-160

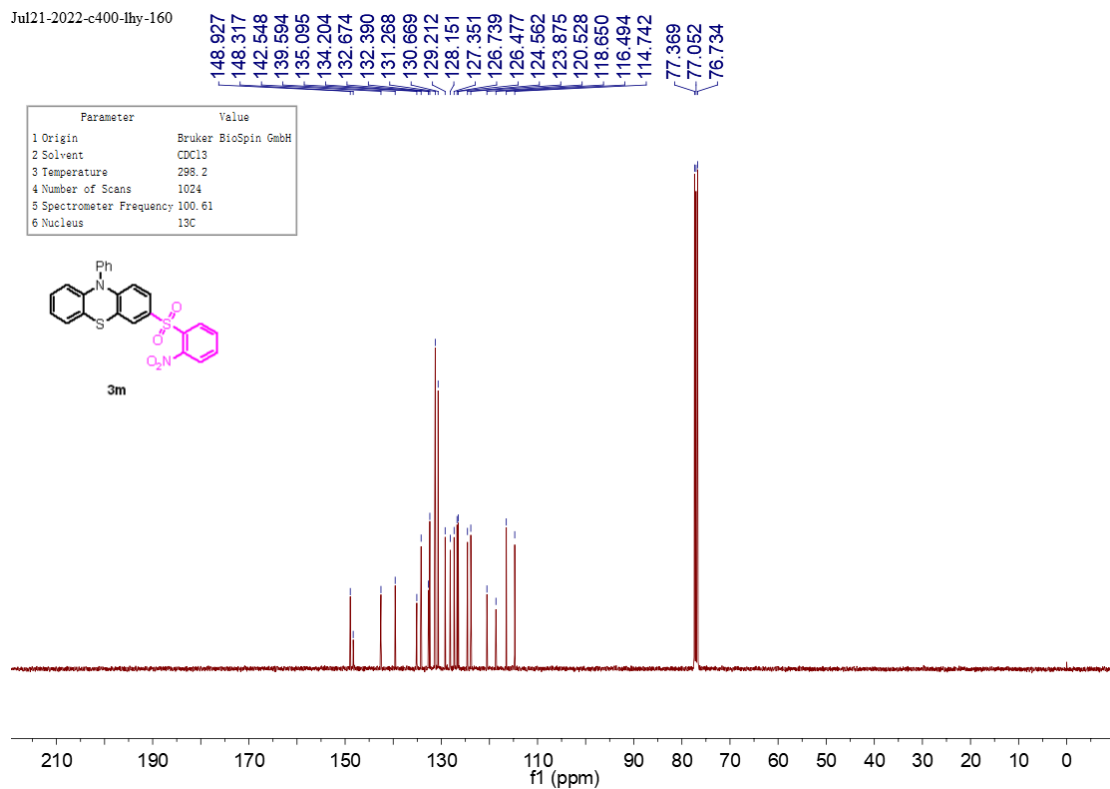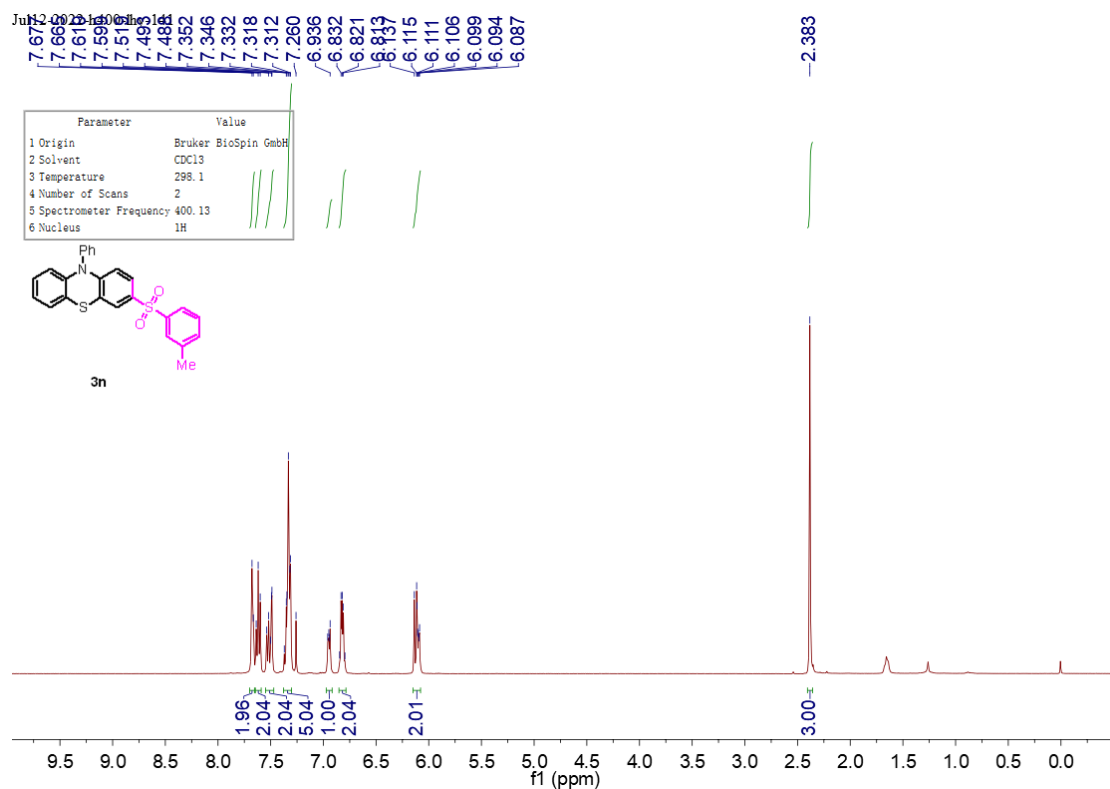



Jul12-2022-c400-lhy-141

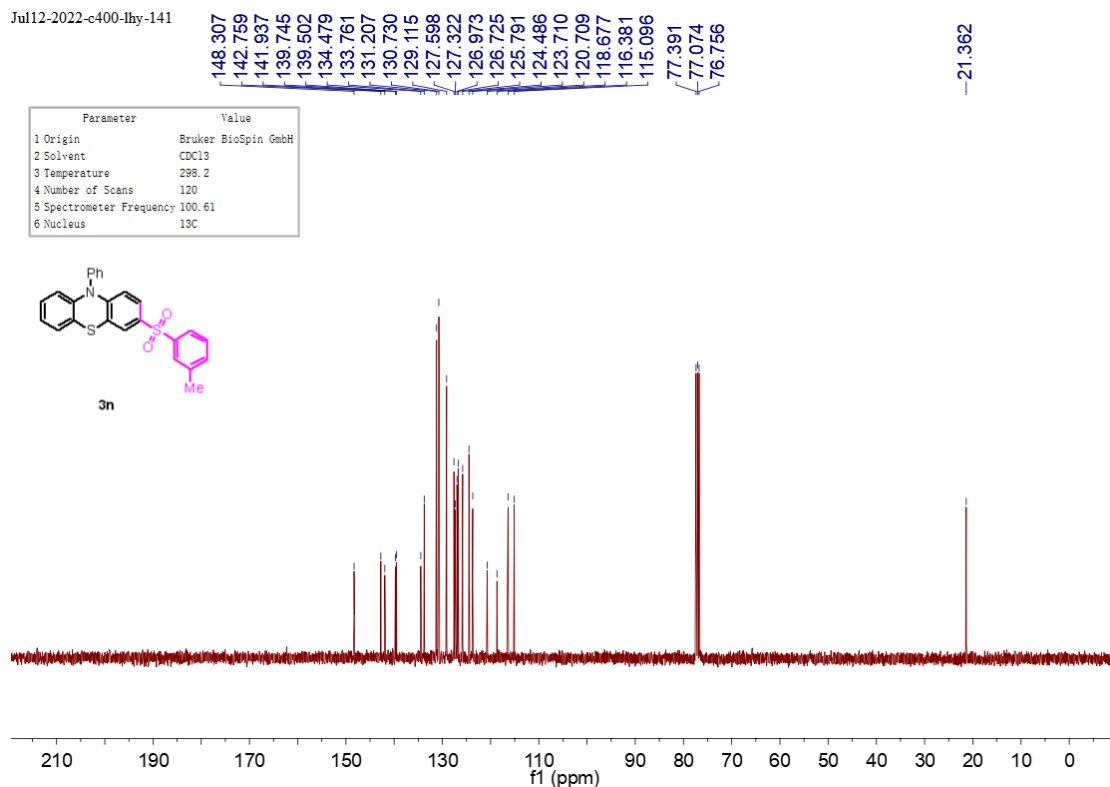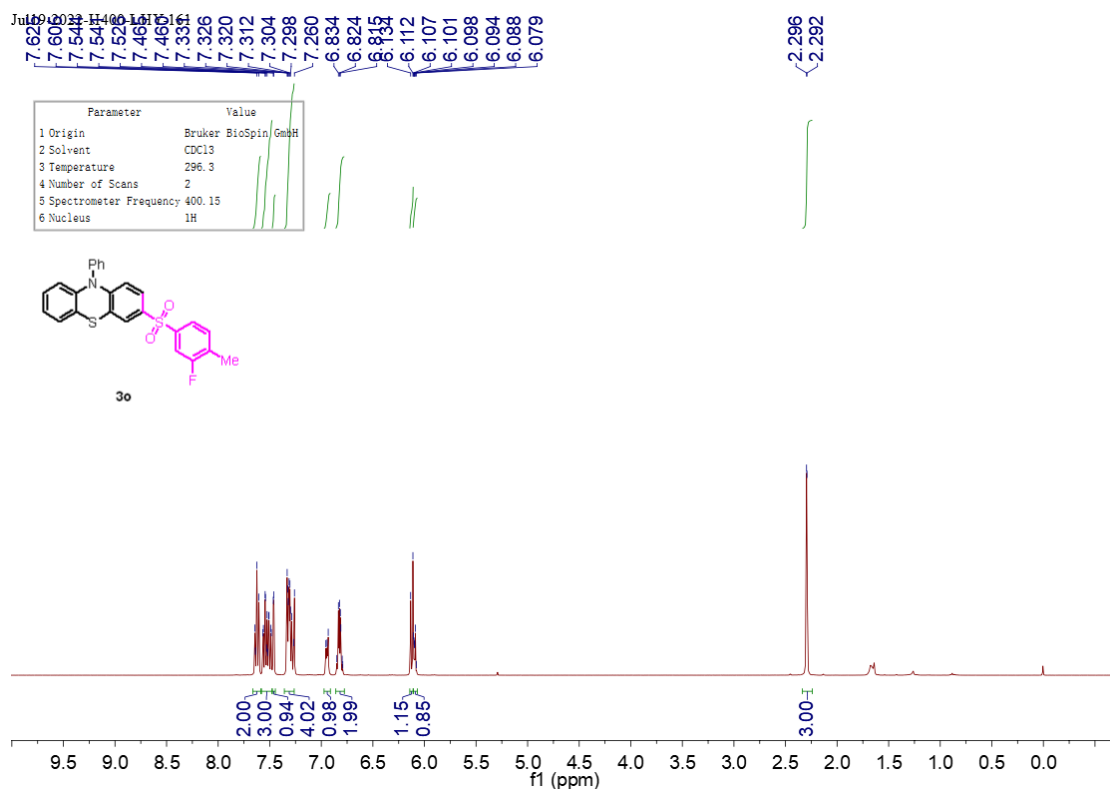

Jul19-2022-C400-LHY-161

| Parameter                | Value               |
|--------------------------|---------------------|
| 1 Origin                 | Bruker BioSpin GmbH |
| 2 Solvent                | CDCl3               |
| 3 Temperature            | 296.7               |
| 4 Number of Scans        | 60                  |
| 5 Spectrometer Frequency | 100.62              |
| 6 Nucleus                | 13C                 |

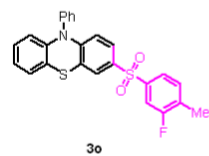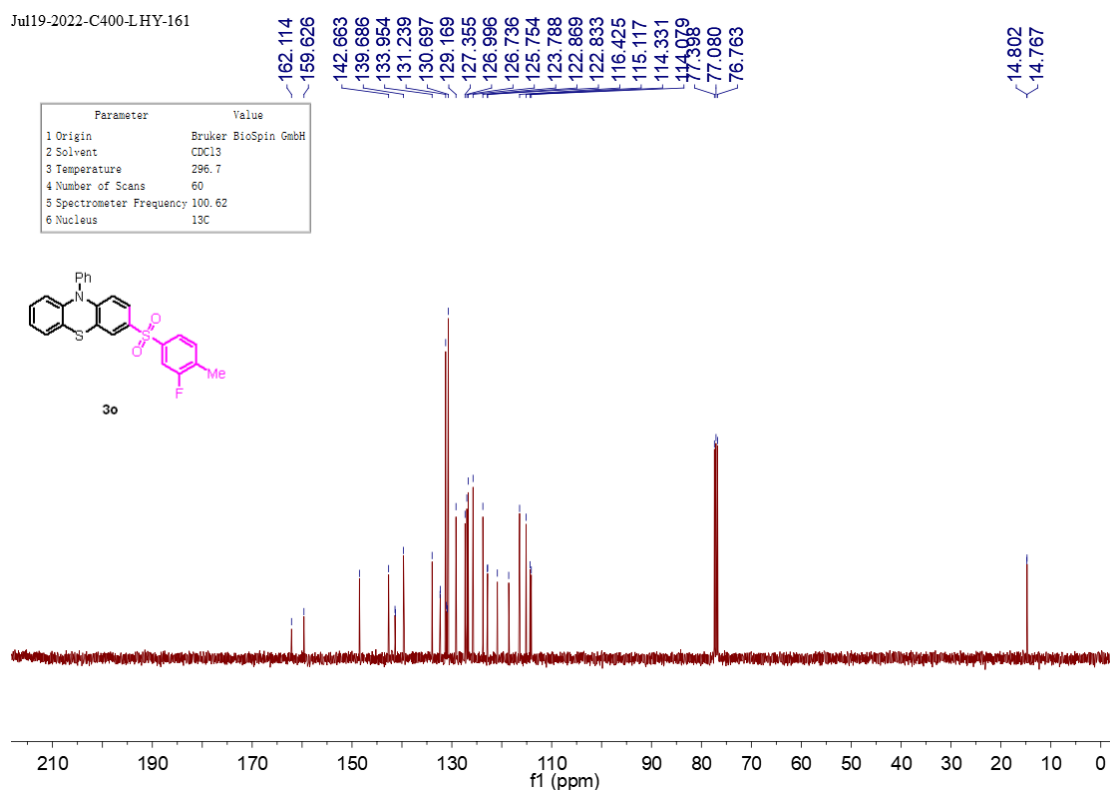

Jul19-2022-F400-LHY-161

| Parameter                | Value               |
|--------------------------|---------------------|
| 1 Origin                 | Bruker BioSpin GmbH |
| 2 Solvent                | CDCl3               |
| 3 Temperature            | 296.3               |
| 4 Number of Scans        | 2                   |
| 5 Spectrometer Frequency | 376.52              |
| 6 Nucleus                | 19F                 |

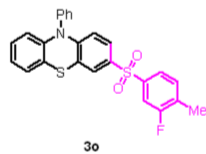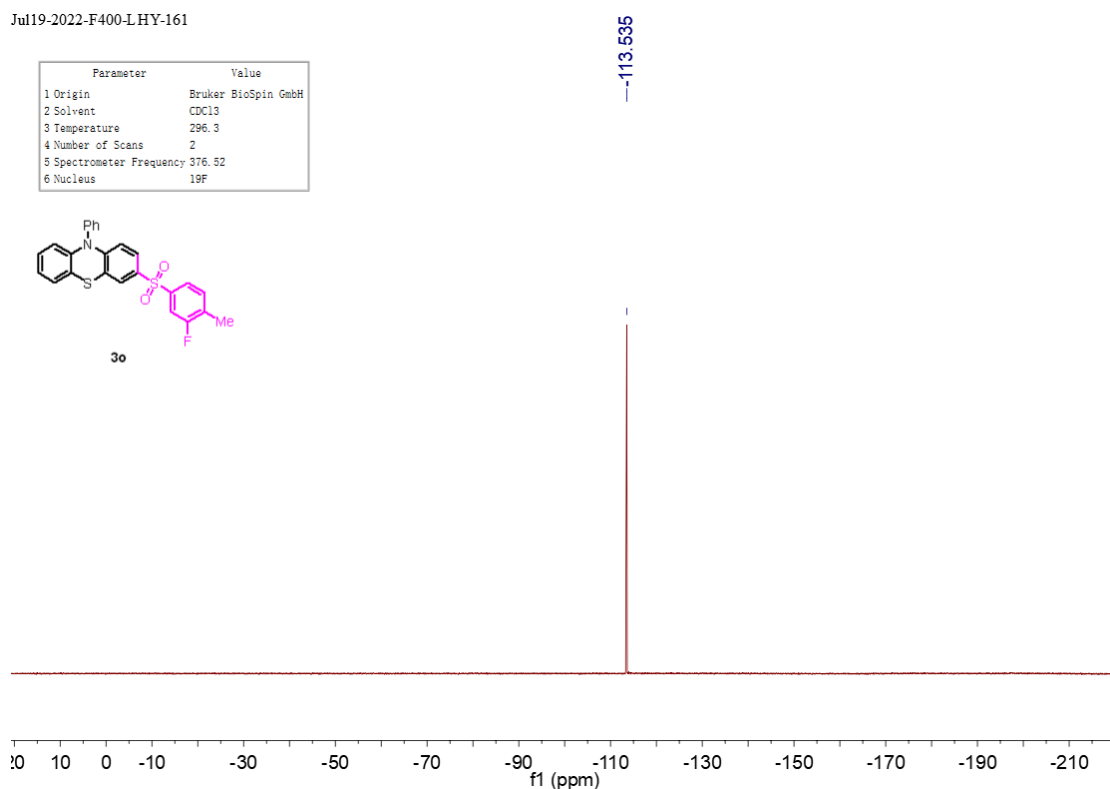

Jul15-2022-h C400-lhy-155

| Parameter                | Value               |
|--------------------------|---------------------|
| 1 Origin                 | Bruker BioSpin GmbH |
| 2 Solvent                | CDCl3               |
| 3 Temperature            | 298.2               |
| 4 Number of Scans        | 2                   |
| 5 Spectrometer Frequency | 400.13              |
| 6 Nucleus                | 1H                  |

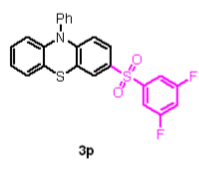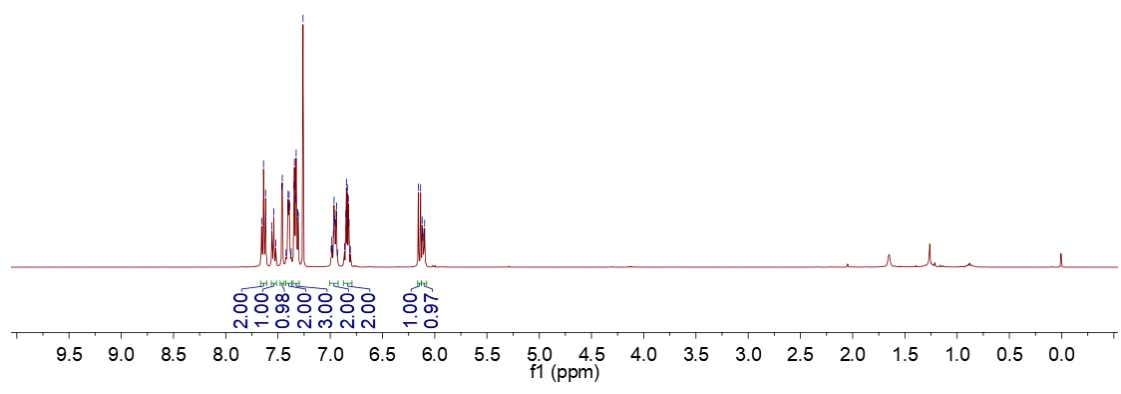

Jul15-2022-h C400-lhy-155

| Parameter                | Value               |
|--------------------------|---------------------|
| 1 Origin                 | Bruker BioSpin GmbH |
| 2 Solvent                | CDCl3               |
| 3 Temperature            | 298.4               |
| 4 Number of Scans        | 213                 |
| 5 Spectrometer Frequency | 100.61              |
| 6 Nucleus                | 13C                 |

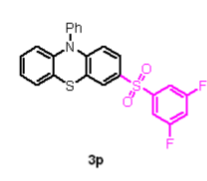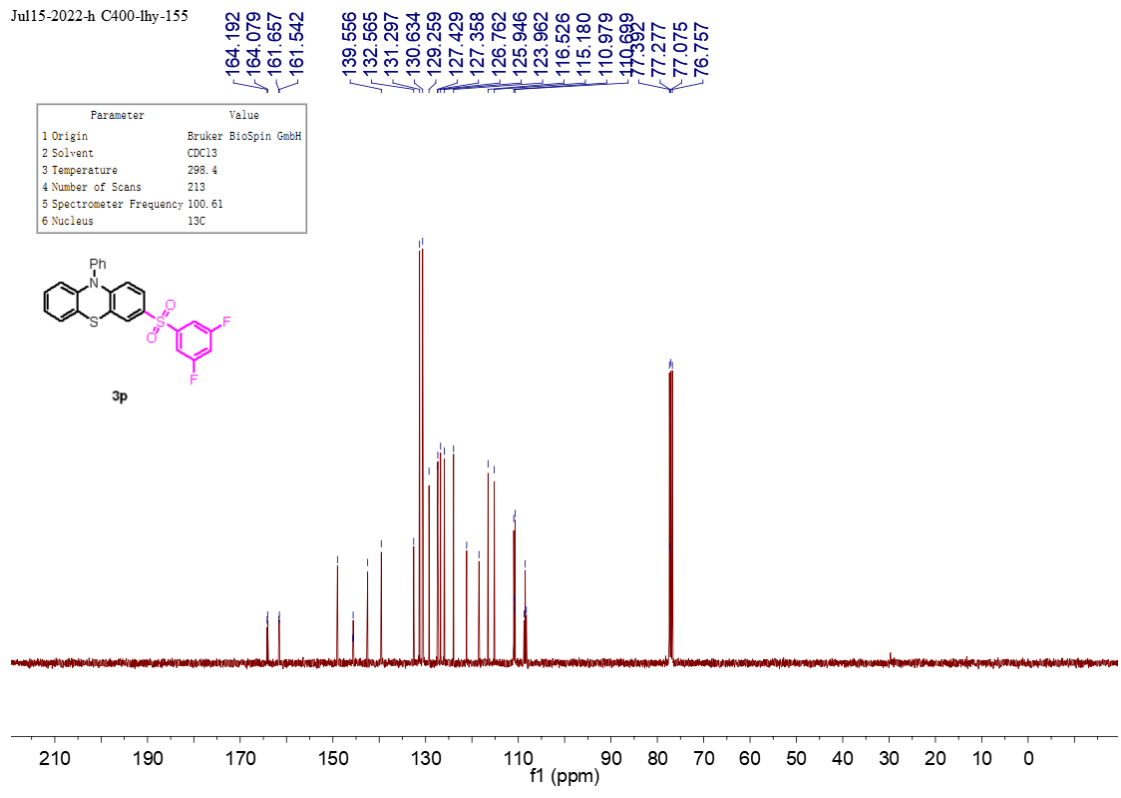

Jul18-2022-F400-LHY-155

| Parameter                | Value               |
|--------------------------|---------------------|
| 1 Origin                 | Bruker BioSpin GmbH |
| 2 Solvent                | CDCl3               |
| 3 Temperature            | 297.5               |
| 4 Number of Scans        | 2                   |
| 5 Spectrometer Frequency | 376.52              |
| 6 Nucleus                | 19F                 |

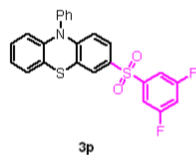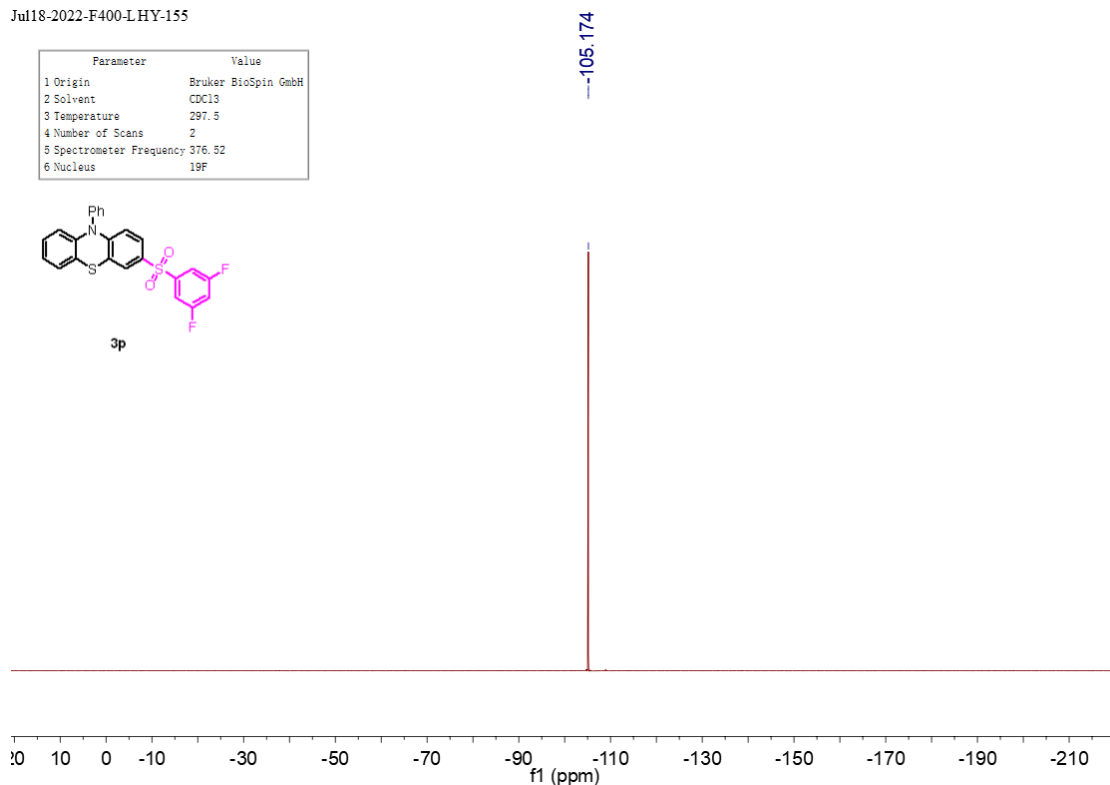

Jul18-2022-F400-LHY-155  
 7.674 7.662 7.660 7.659 7.633 7.625 7.615 7.595 7.533 7.515 7.496 7.463 7.458 7.330 7.327 7.314 7.309 7.292 7.287 7.260 6.953 6.946 6.943 6.936 6.931 6.923 6.839 6.827 6.821 6.816 6.809 6.804 6.797 6.791 6.785 6.774 6.126 6.117 6.109 6.104 6.097 6.093 6.086 6.077 4.645 4.623 4.601 3.230 3.208 3.186

| Parameter                | Value               |
|--------------------------|---------------------|
| 1 Origin                 | Bruker BioSpin GmbH |
| 2 Solvent                | CDCl3               |
| 3 Temperature            | 298.1               |
| 4 Number of Scans        | 2                   |
| 5 Spectrometer Frequency | 400.13              |
| 6 Nucleus                | 1H                  |

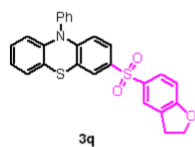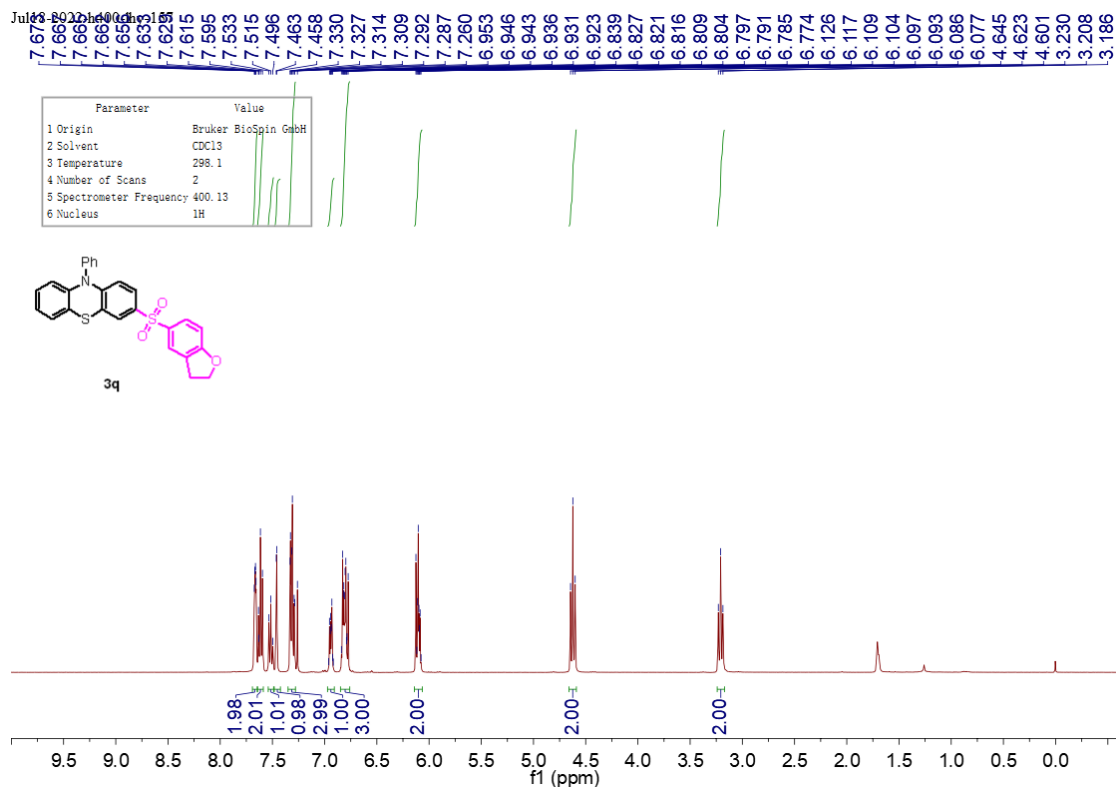

Jul18-2022-C400-1hy-157

| Parameter                | Value               |
|--------------------------|---------------------|
| 1 Origin                 | Bruker BioSpin GmbH |
| 2 Solvent                | CDCl3               |
| 3 Temperature            | 296,9               |
| 4 Number of Scans        | 21                  |
| 5 Spectrometer Frequency | 100,62              |
| 6 Nucleus                | 13C                 |

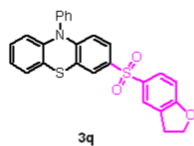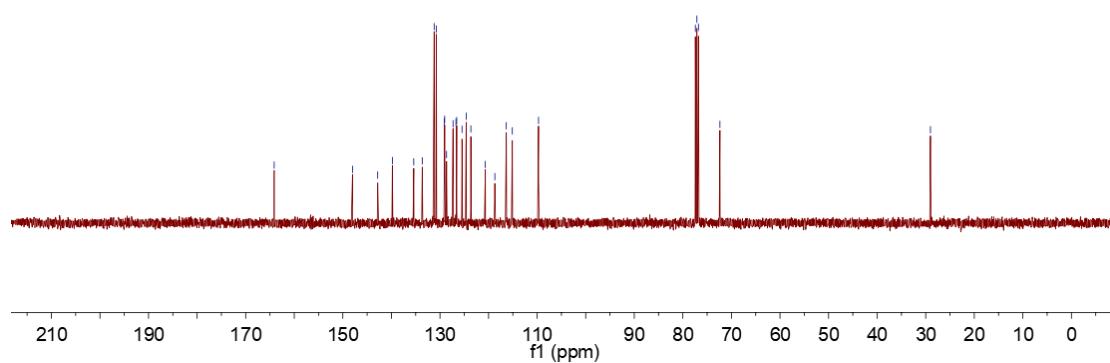

Jul12-2022-h400-1hy-146

| Parameter                | Value               |
|--------------------------|---------------------|
| 1 Origin                 | Bruker BioSpin GmbH |
| 2 Solvent                | CDCl3               |
| 3 Temperature            | 298,5               |
| 4 Number of Scans        | 2                   |
| 5 Spectrometer Frequency | 400,13              |
| 6 Nucleus                | 1H                  |

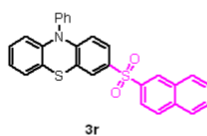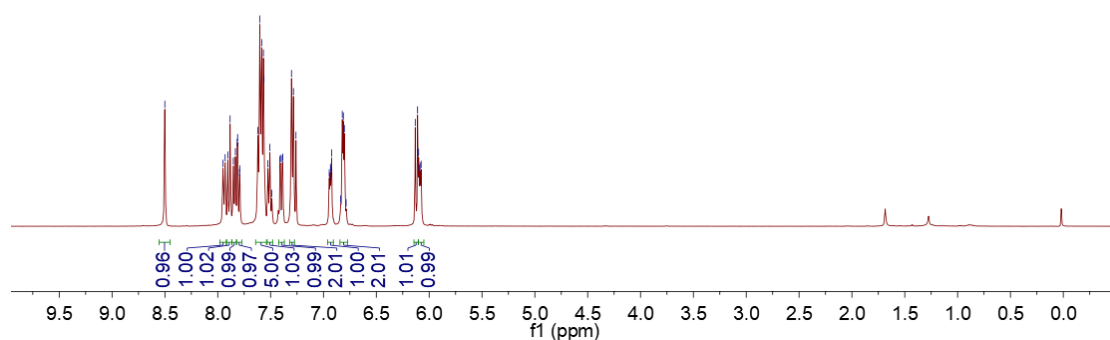

Jul12-2022-c406

148.366  
142.694  
139.708  
138.959  
134.900  
134.366  
132.252  
131.209  
130.701  
129.634  
129.368  
129.126  
129.022  
128.551  
127.920  
127.595  
127.326  
127.096  
126.725  
125.838  
123.734  
122.528  
120.804  
118.651  
116.394  
115.145  
77.434  
77.115  
76.798

| Parameter                | Value               |
|--------------------------|---------------------|
| 1 Origin                 | Bruker BioSpin GmbH |
| 2 Solvent                | CDCl3               |
| 3 Temperature            | 298.9               |
| 4 Number of Scans        | 30                  |
| 5 Spectrometer Frequency | 100.61              |
| 6 Nucleus                | 13C                 |

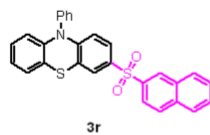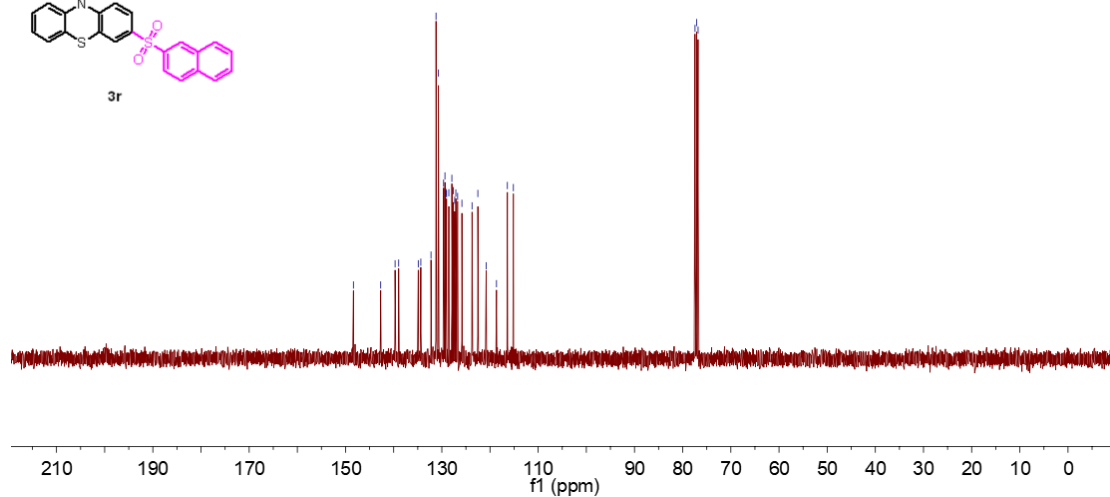

Jul13-2022-1440

8.407  
8.041  
7.562  
7.518  
7.514  
7.515  
7.502  
7.498  
7.298  
7.280  
7.260  
6.815  
6.812  
6.805  
6.795  
6.792  
6.783  
6.081  
6.070  
6.065  
6.058

| Parameter                | Value               |
|--------------------------|---------------------|
| 1 Origin                 | Bruker BioSpin GmbH |
| 2 Solvent                | CDCl3               |
| 3 Temperature            | 298.2               |
| 4 Number of Scans        | 2                   |
| 5 Spectrometer Frequency | 400.13              |
| 6 Nucleus                | 1H                  |

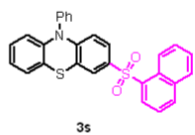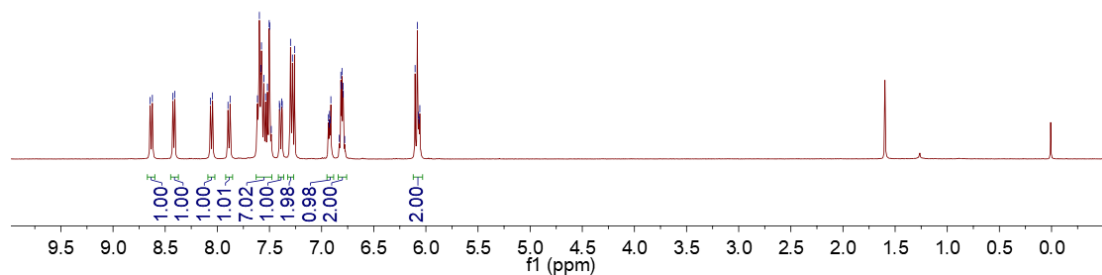

Jul13-2022-C400-4hy-37

148.207  
142.699  
139.687  
136.304  
134.897  
134.485  
134.245  
131.152  
130.716  
129.614  
129.062  
129.036  
128.366  
127.275  
126.844  
126.821  
126.677  
125.630  
124.401  
123.666  
120.606  
118.628  
116.333  
114.839  
77.361  
77.044  
76.726

| Parameter                | Value               |
|--------------------------|---------------------|
| 1 Origin                 | Bruker BioSpin GmbH |
| 2 Solvent                | CDCl3               |
| 3 Temperature            | 298.6               |
| 4 Number of Scans        | 80                  |
| 5 Spectrometer Frequency | 100.62              |
| 6 Nucleus                | 13C                 |

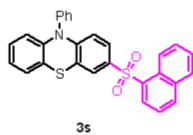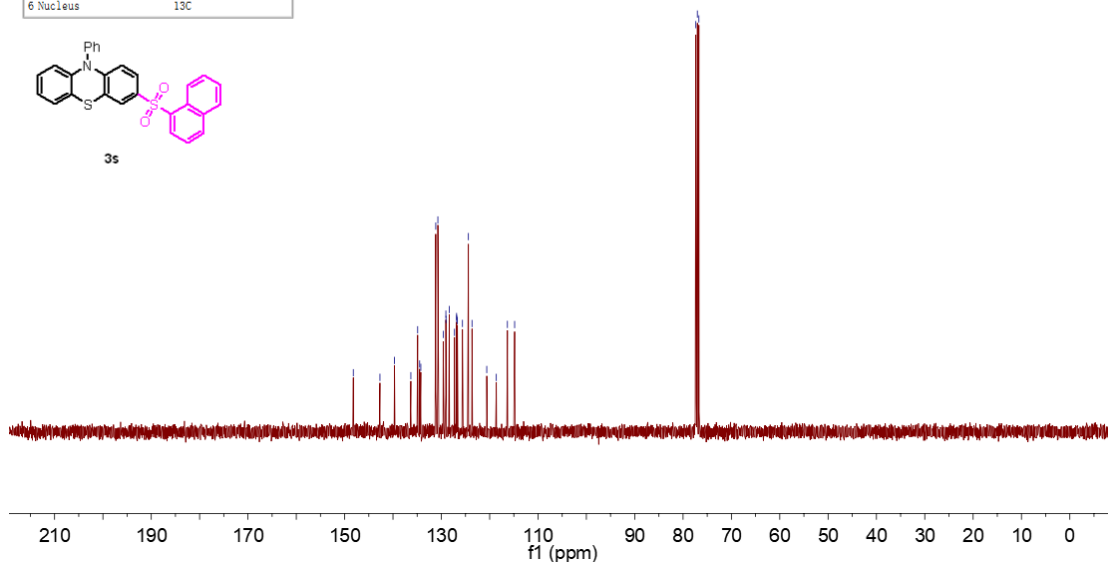

Jul13-2022-1400-4hy-145

7.622  
7.617  
7.607  
7.592  
7.586  
7.574  
7.381  
7.359  
7.353  
7.339  
7.320  
7.041  
6.938  
6.827  
6.817  
6.143  
6.121  
6.116  
6.104  
6.092  
6.083

| Parameter                | Value               |
|--------------------------|---------------------|
| 1 Origin                 | Bruker BioSpin GmbH |
| 2 Solvent                | CDCl3               |
| 3 Temperature            | 298.5               |
| 4 Number of Scans        | 2                   |
| 5 Spectrometer Frequency | 400.13              |
| 6 Nucleus                | 1H                  |

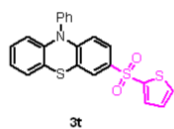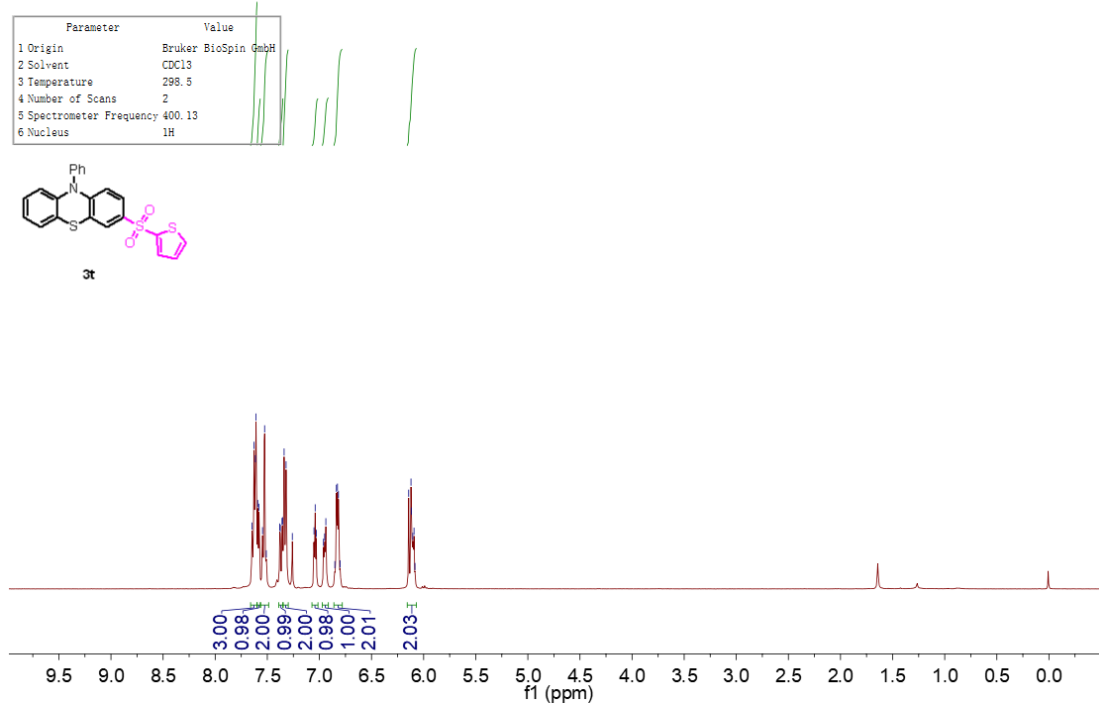

Jul12-2022-c400-lhy-148

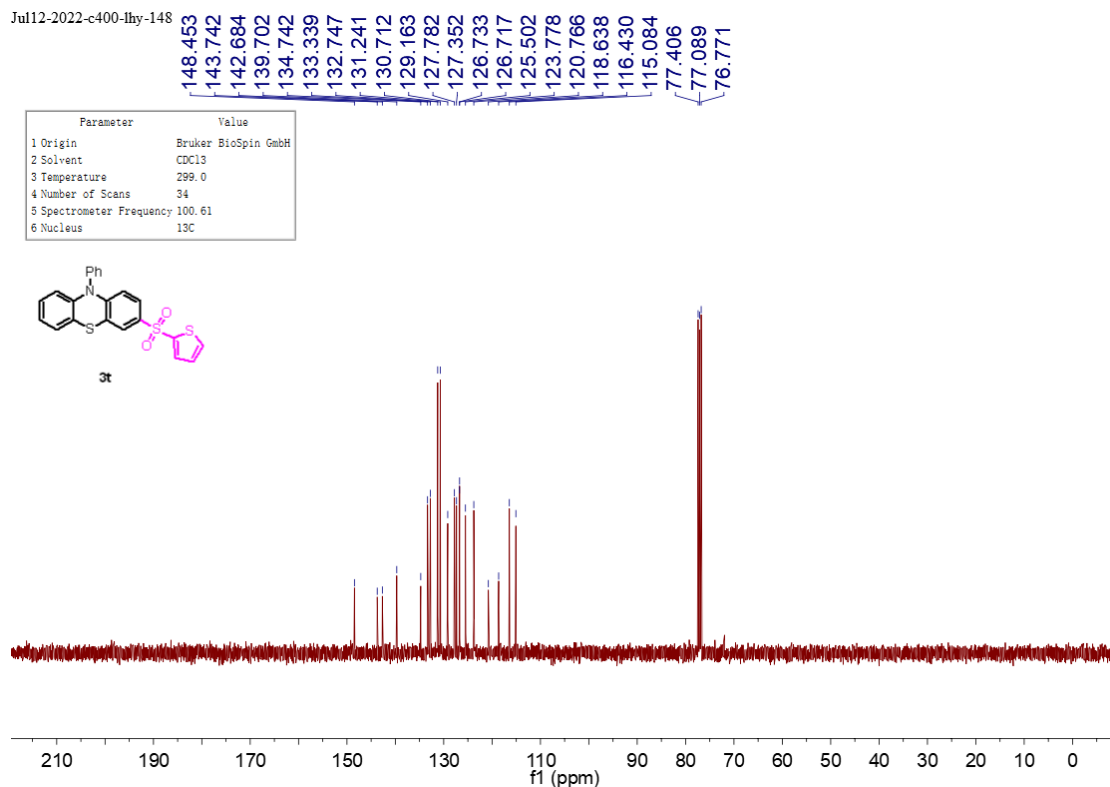

Jul15-2022-h490-lhy-149

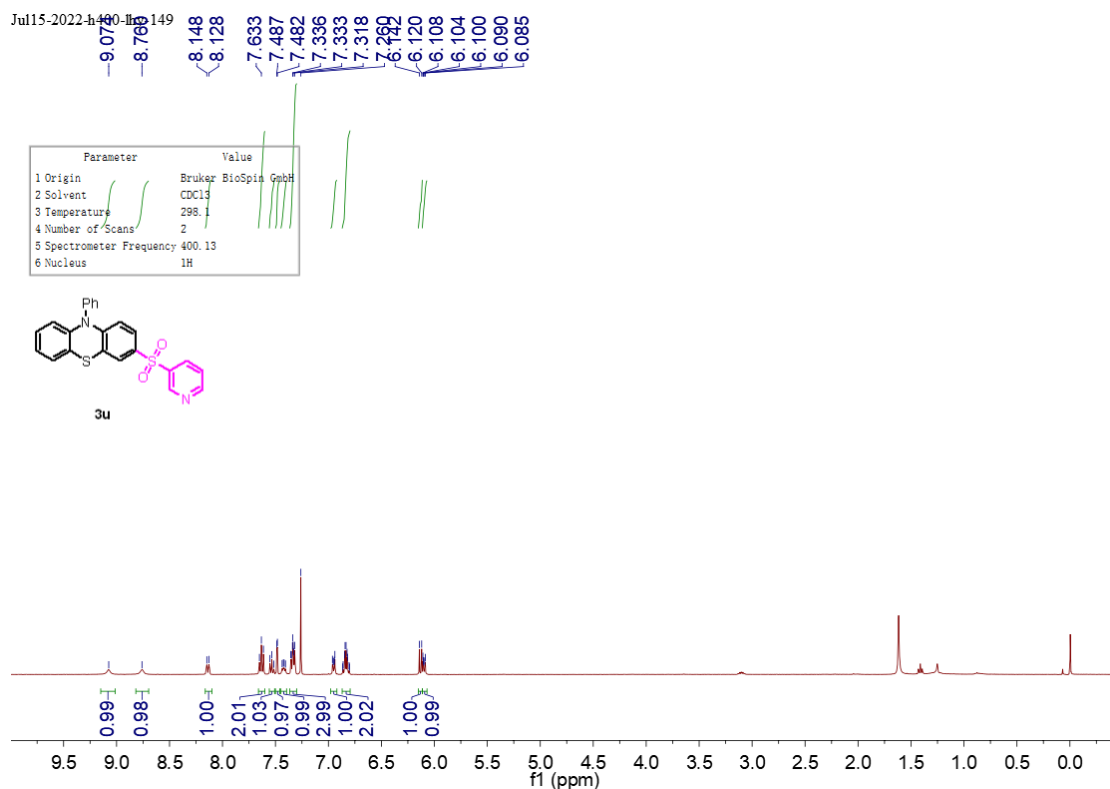



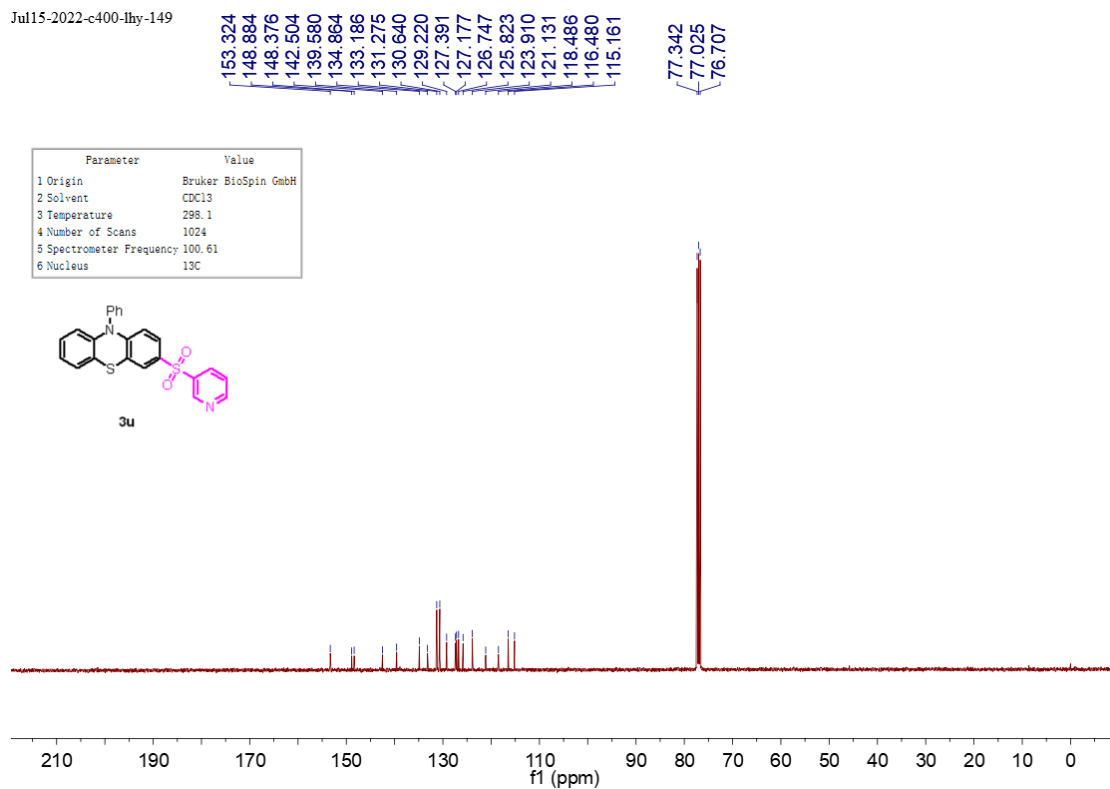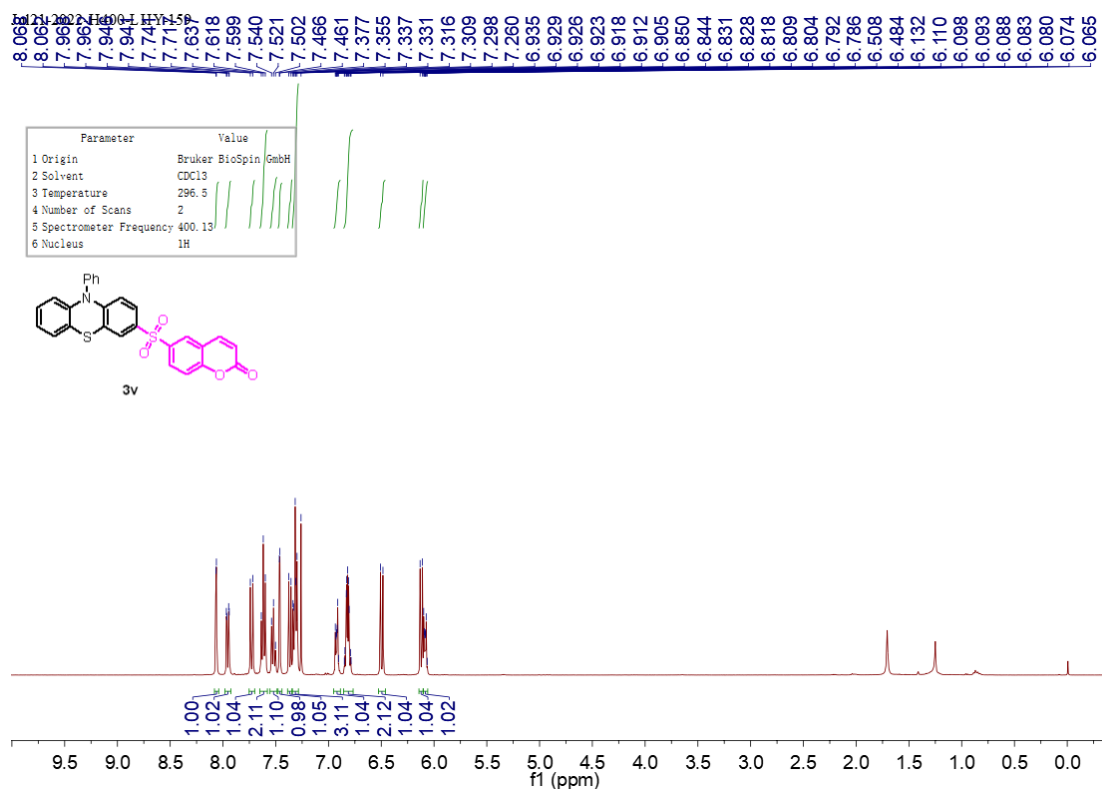

Jul21-2022-c400#

159.284  
156.452  
148.684  
142.512  
142.496  
139.553  
138.551  
133.482  
131.261  
130.621  
130.381  
129.211  
127.592  
127.412  
127.034  
126.717  
125.707  
123.882  
121.045  
119.036  
118.443  
118.292  
118.138  
116.475  
115.162  
77.403  
77.085  
76.767

| Parameter                | Value               |
|--------------------------|---------------------|
| 1 Origin                 | Bruker BioSpin GmbH |
| 2 Solvent                | CDCl3               |
| 3 Temperature            | 298.1               |
| 4 Number of Scans        | 25                  |
| 5 Spectrometer Frequency | 100.62              |
| 6 Nucleus                | 13C                 |

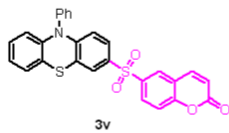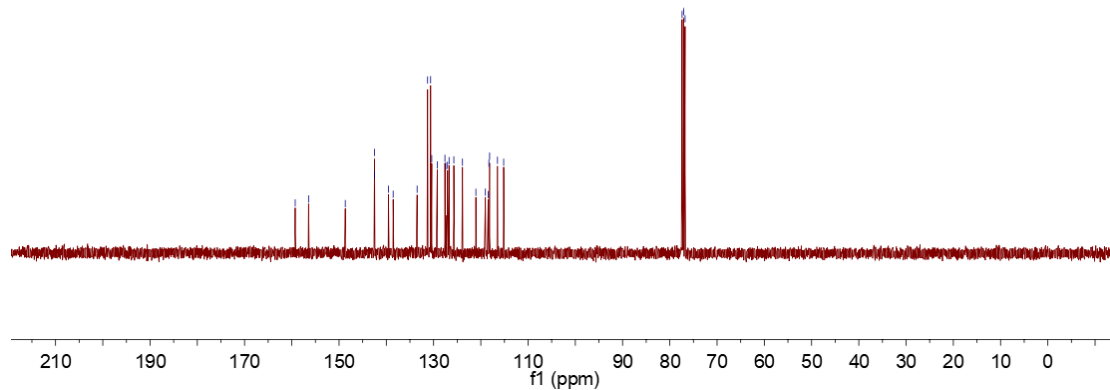

Jul21-2022-c400#

7.862  
7.843  
7.637  
7.511  
7.377  
7.372  
7.368  
7.350  
7.346  
7.340  
7.322  
7.282  
7.260  
6.838  
6.149  
6.120  
6.116  
6.110  
6.103  
6.097  
-2.451

| Parameter                | Value               |
|--------------------------|---------------------|
| 1 Origin                 | Bruker BioSpin GmbH |
| 2 Solvent                | CDCl3               |
| 3 Temperature            | 298.1               |
| 4 Number of Scans        | 2                   |
| 5 Spectrometer Frequency | 400.13              |
| 6 Nucleus                | 1H                  |

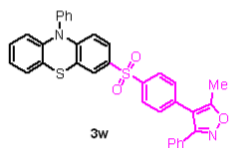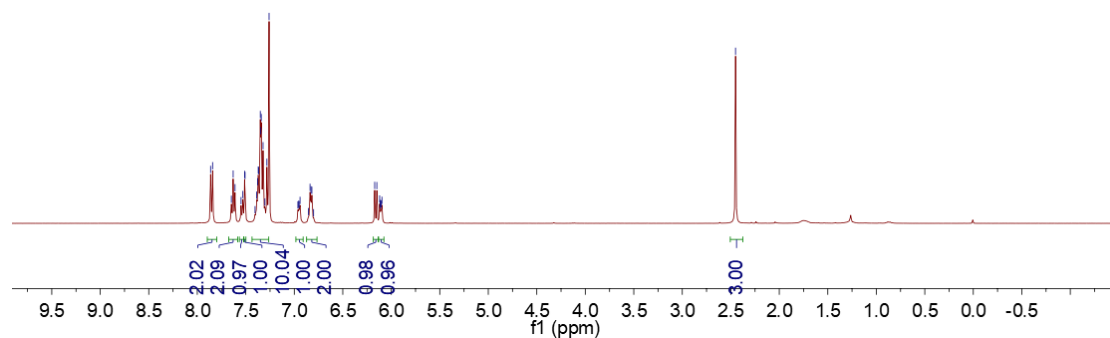

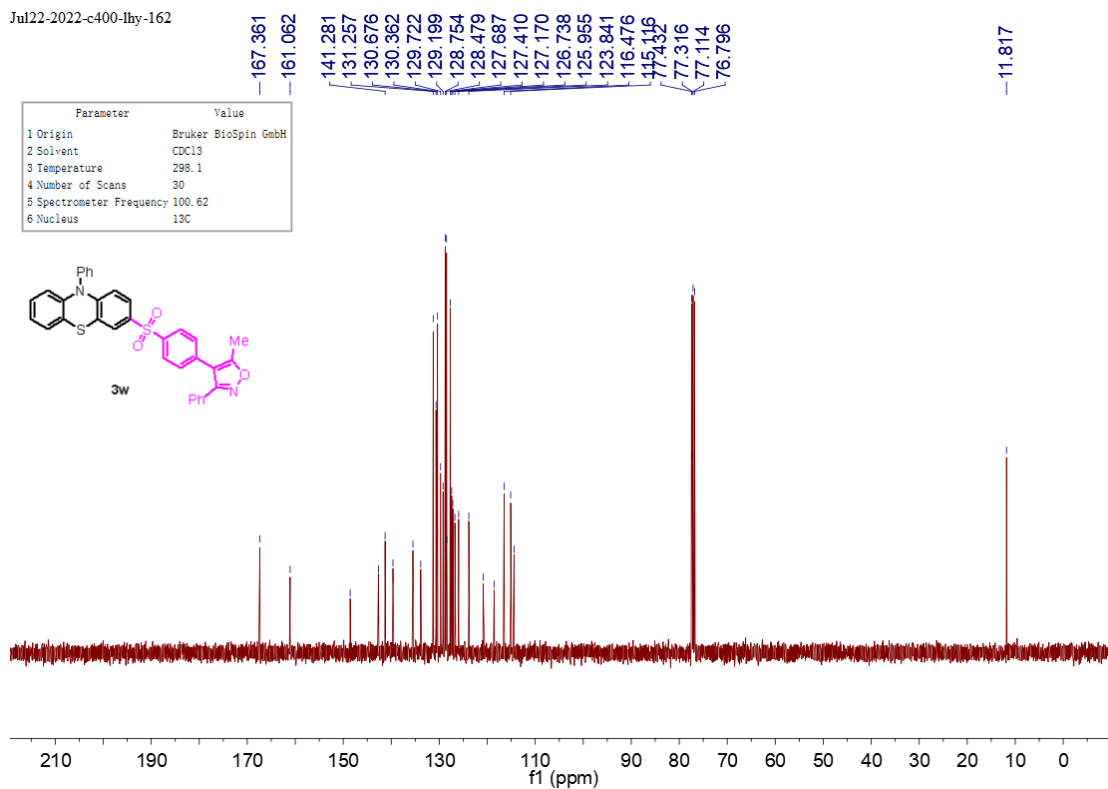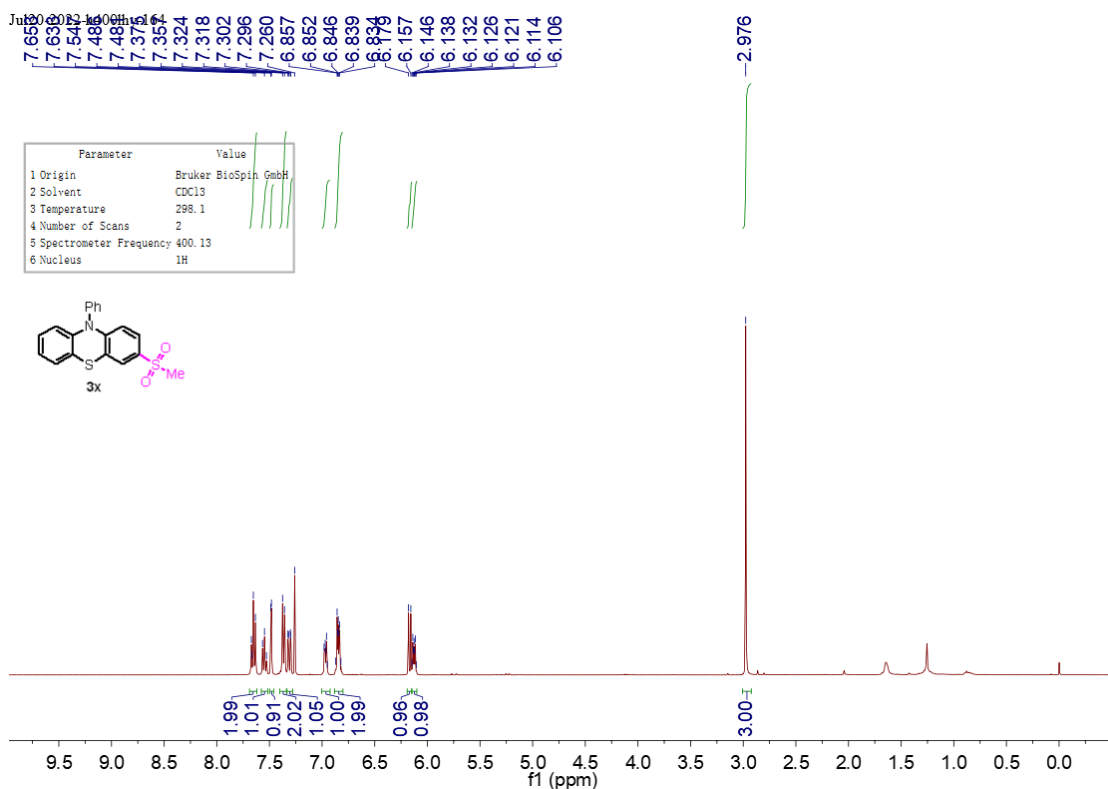

Jul20-2022-C400-LHY-164

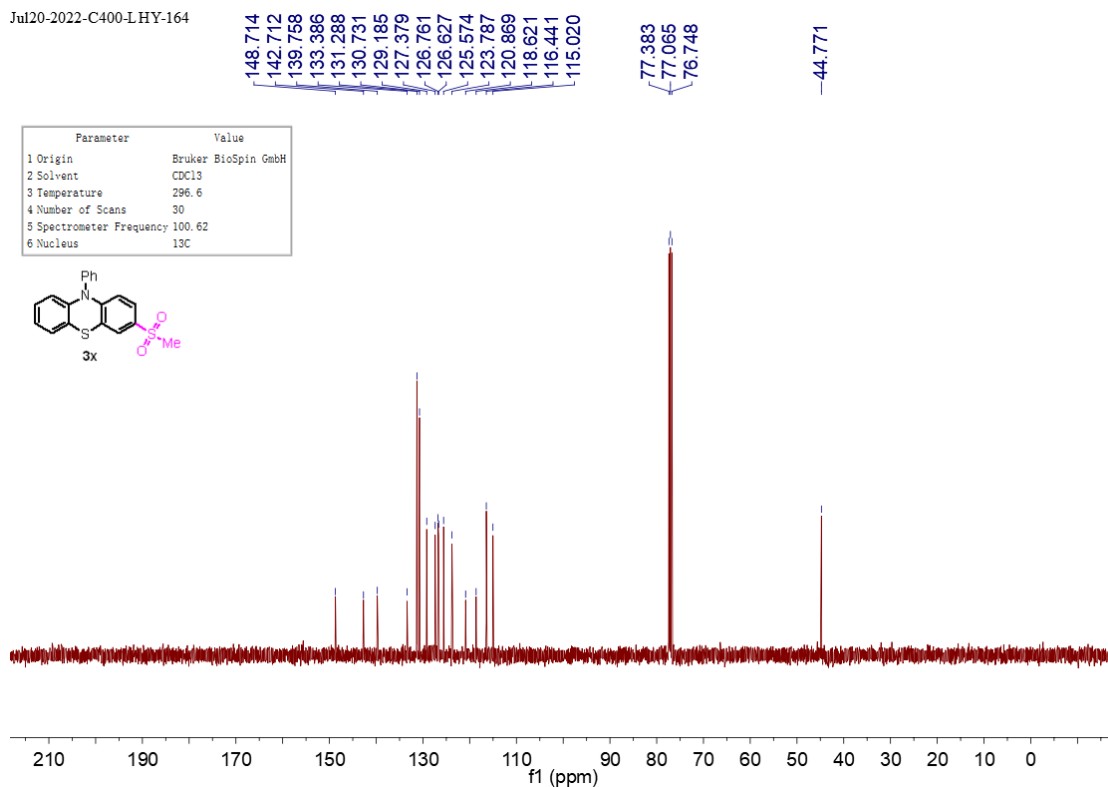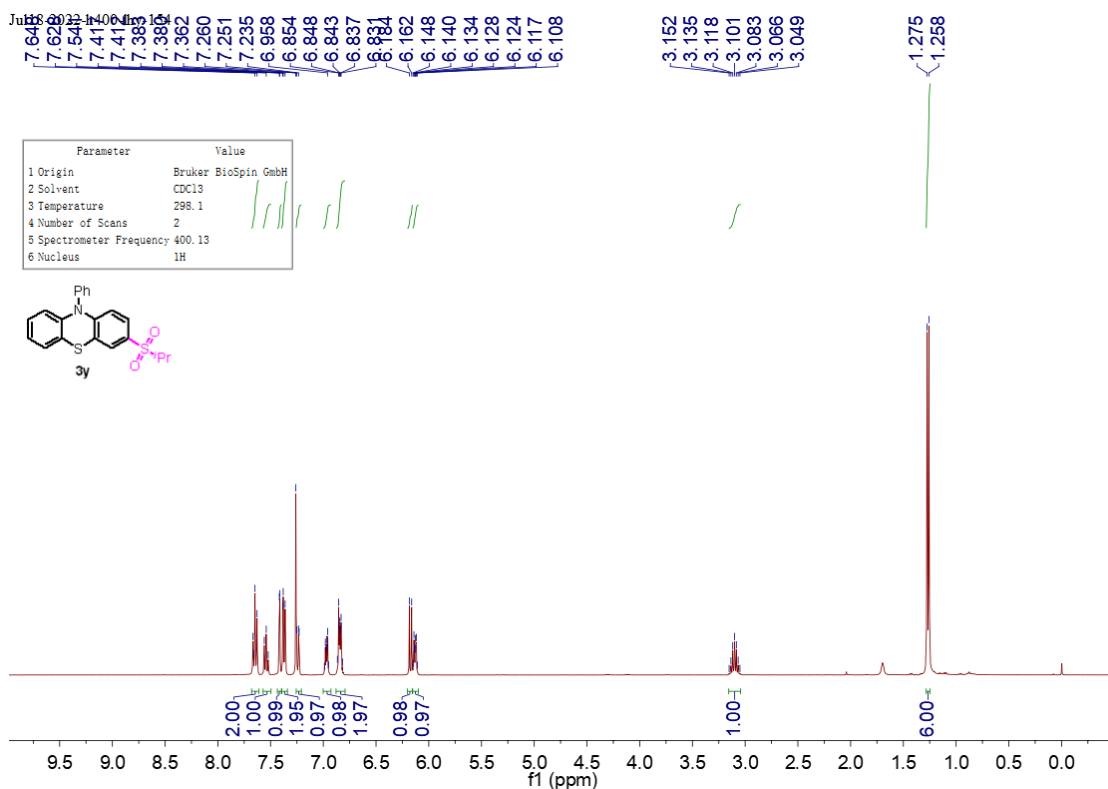

Jul18-2022-C400-hy-154

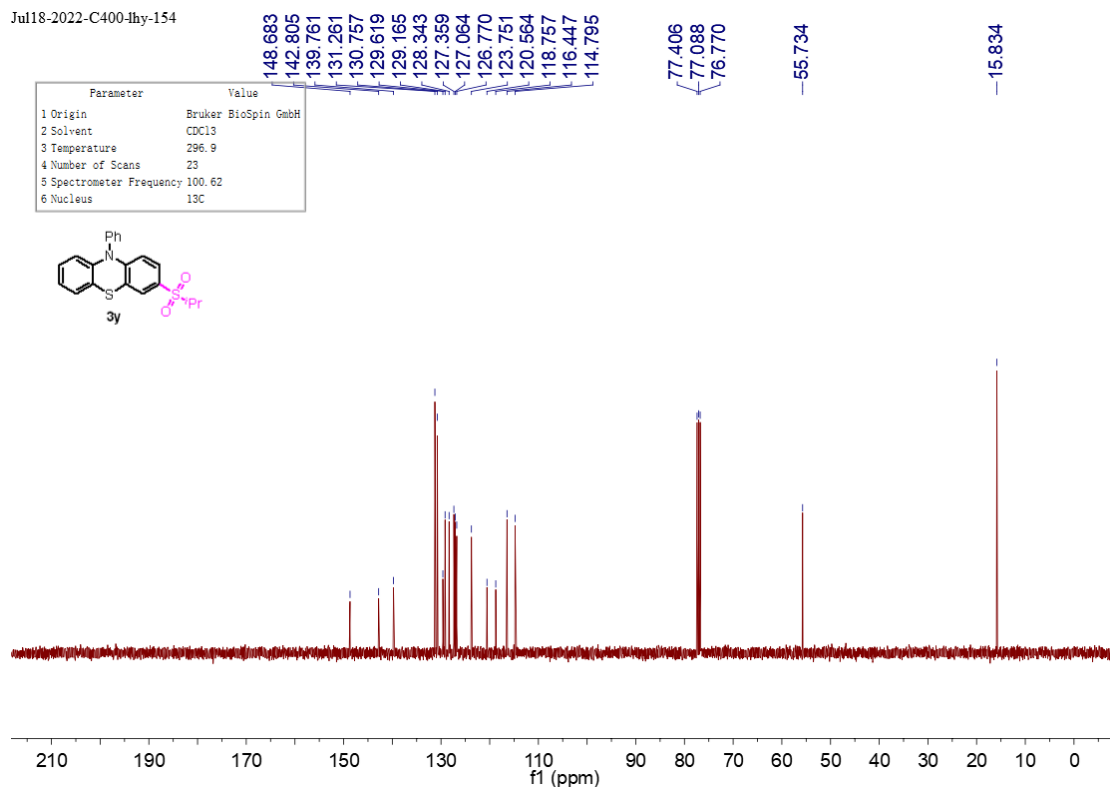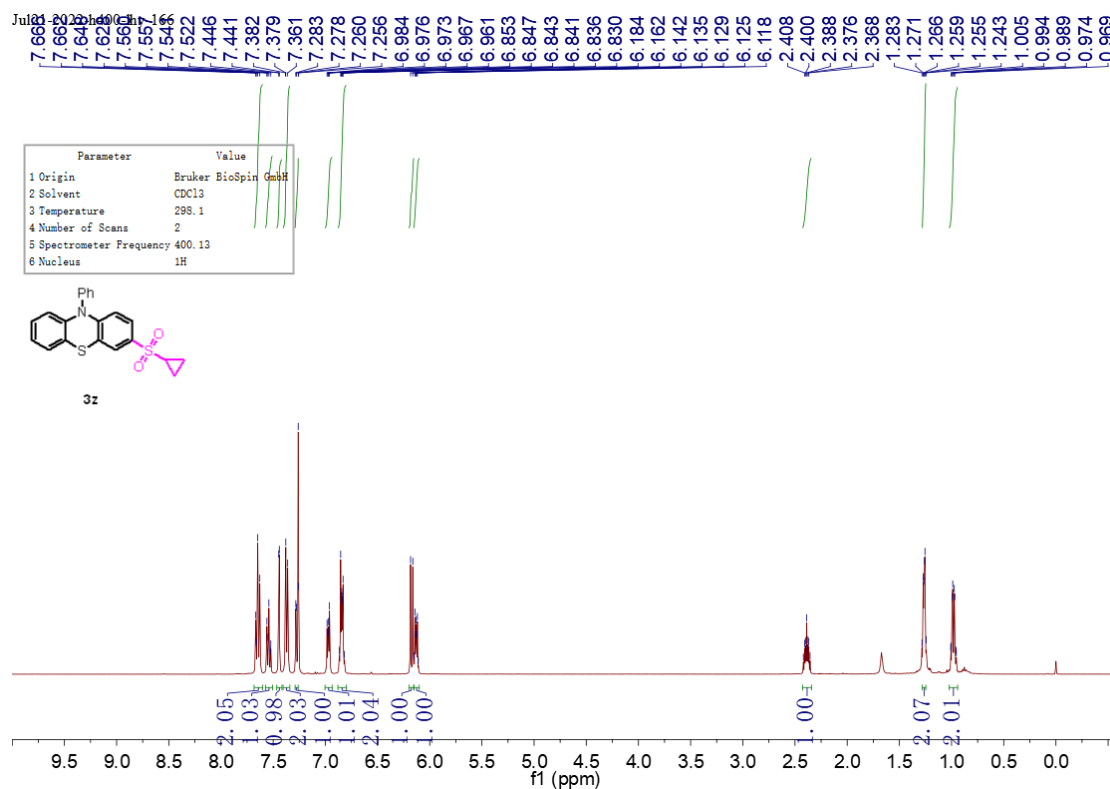

Jul22-2022-C400-LHY-166

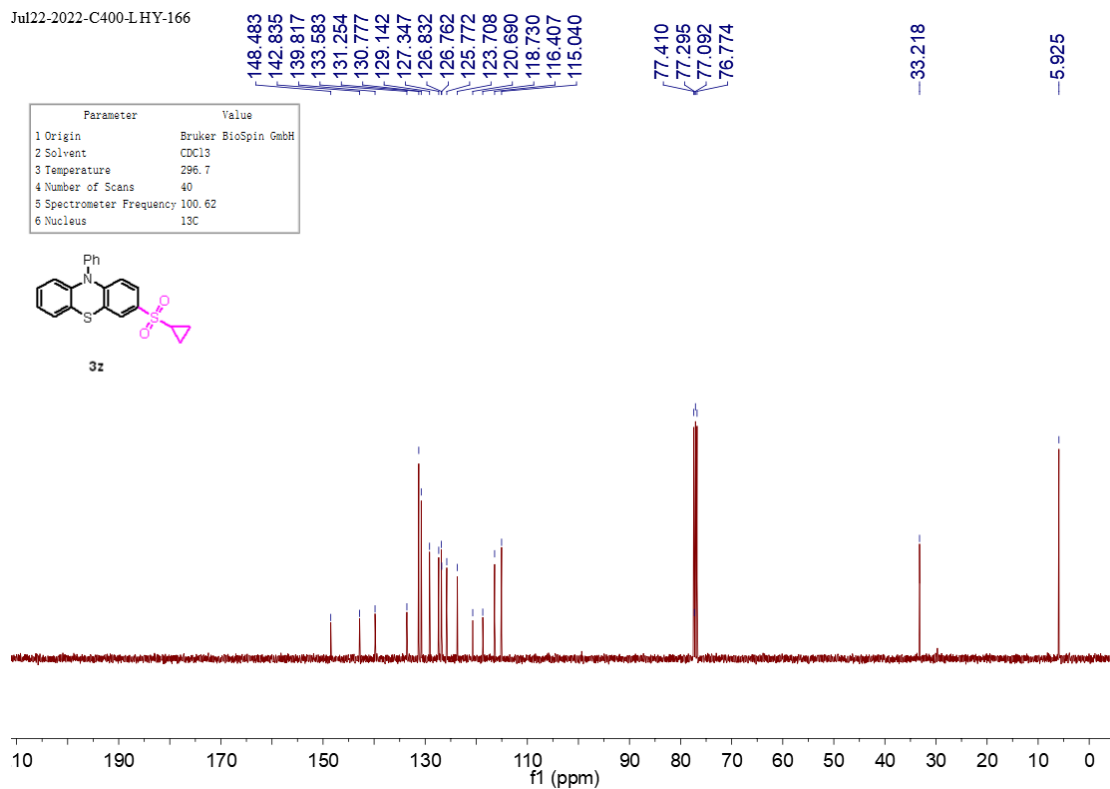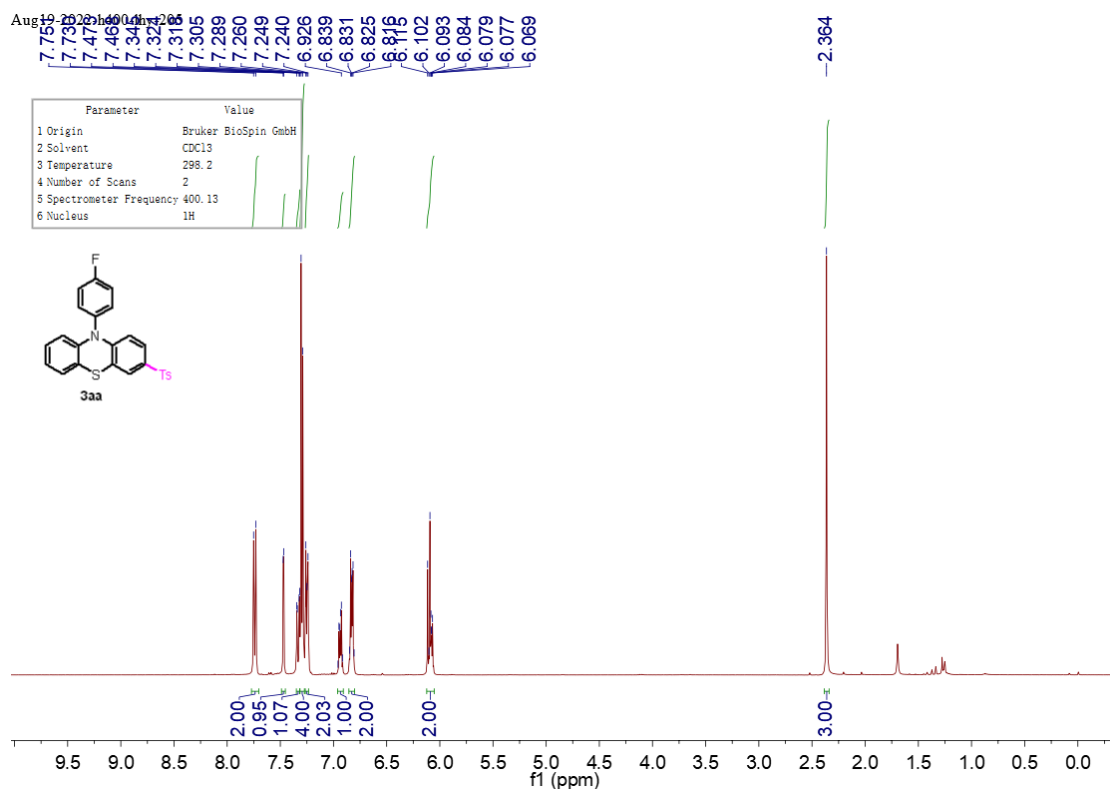

Aug19-2022-c400-lhy-205

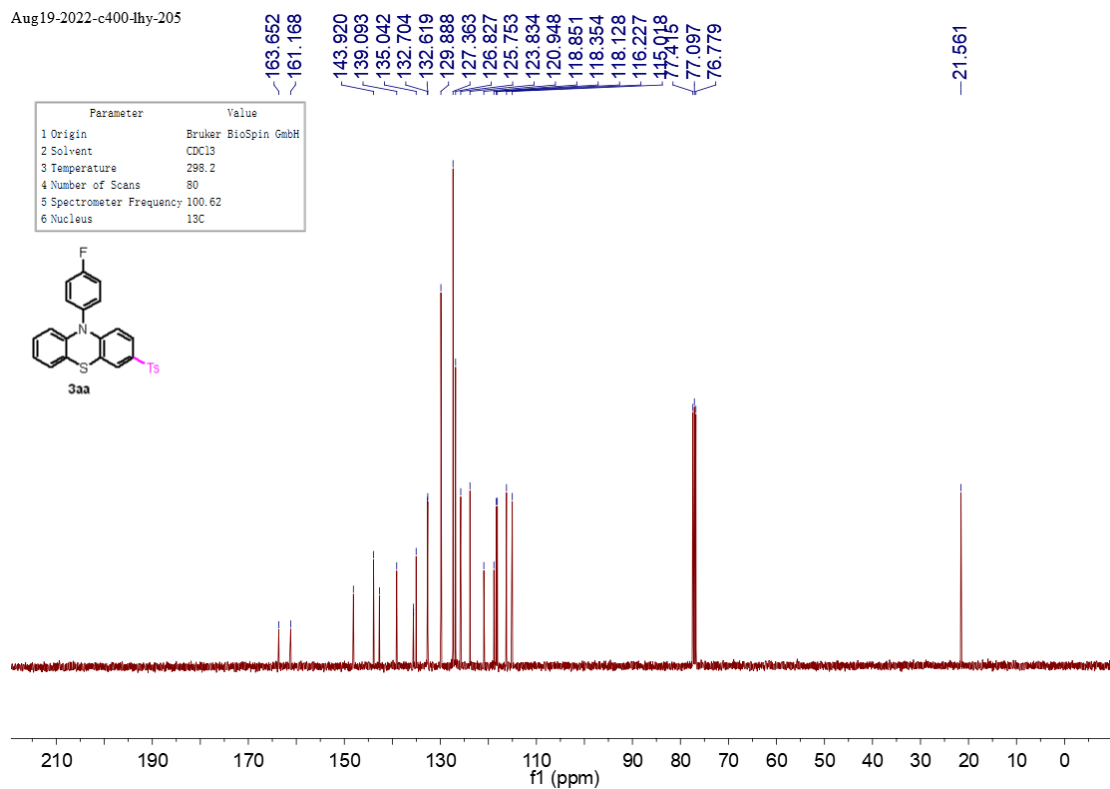

Aug22-2022-F400-LHY-205

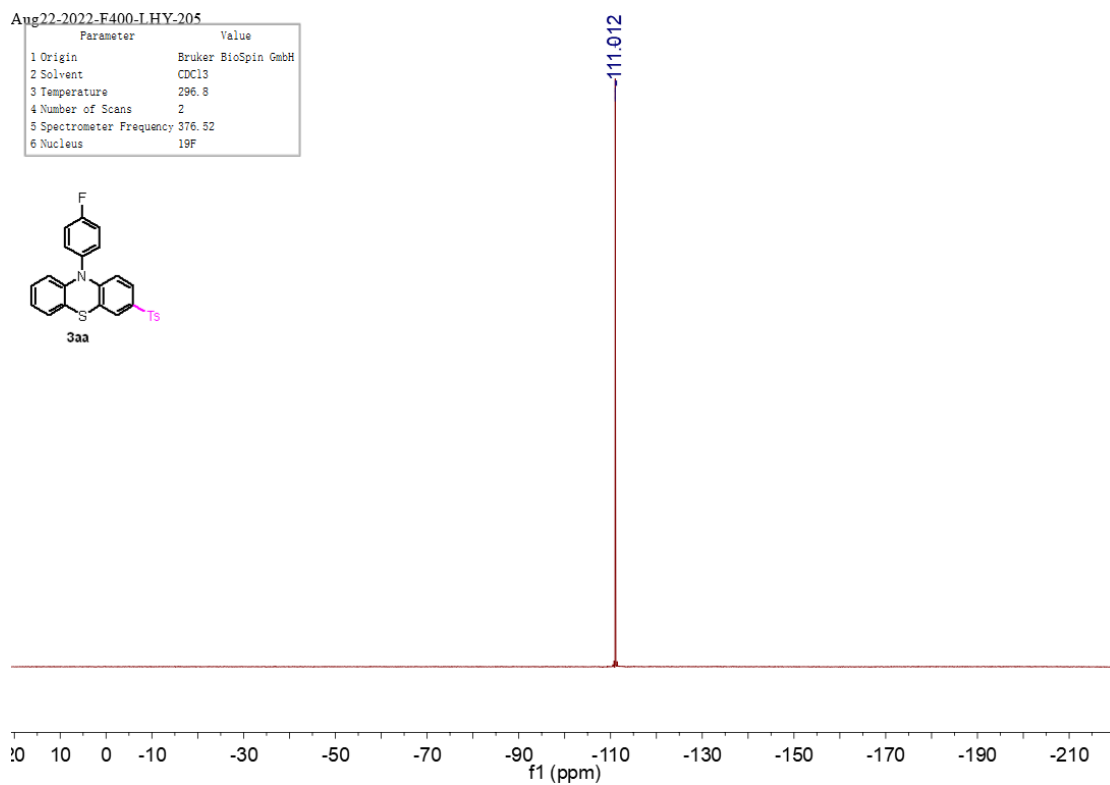

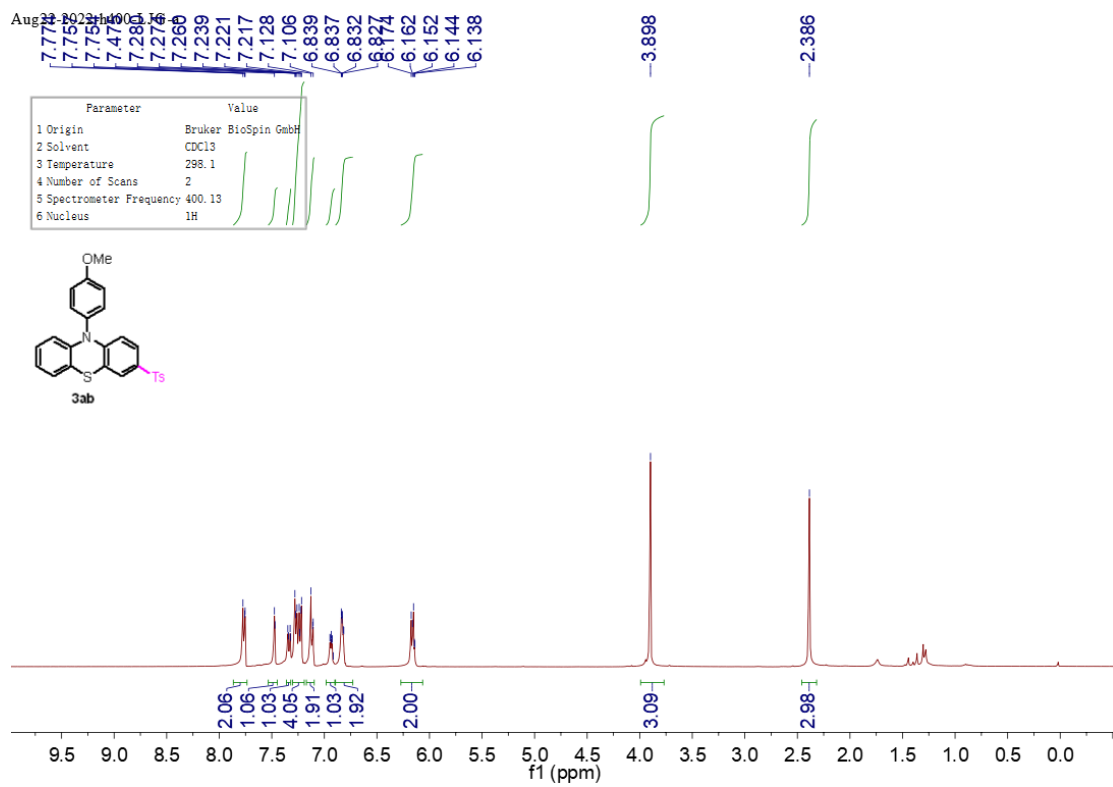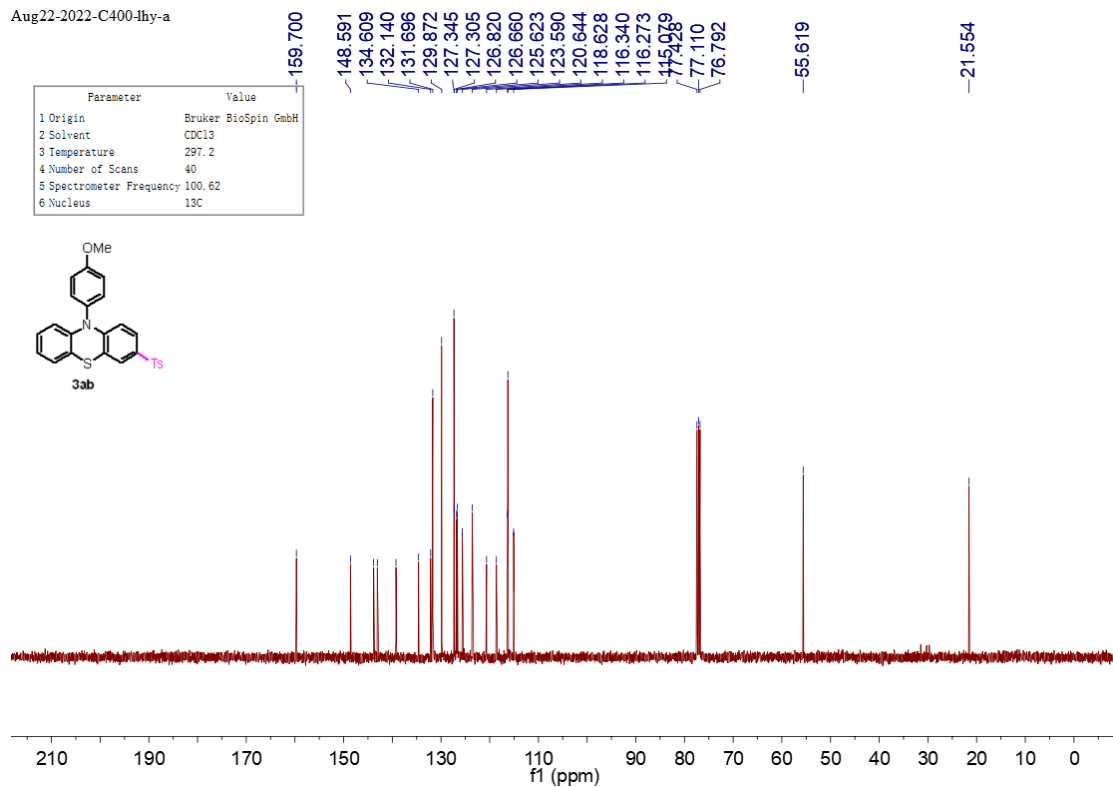



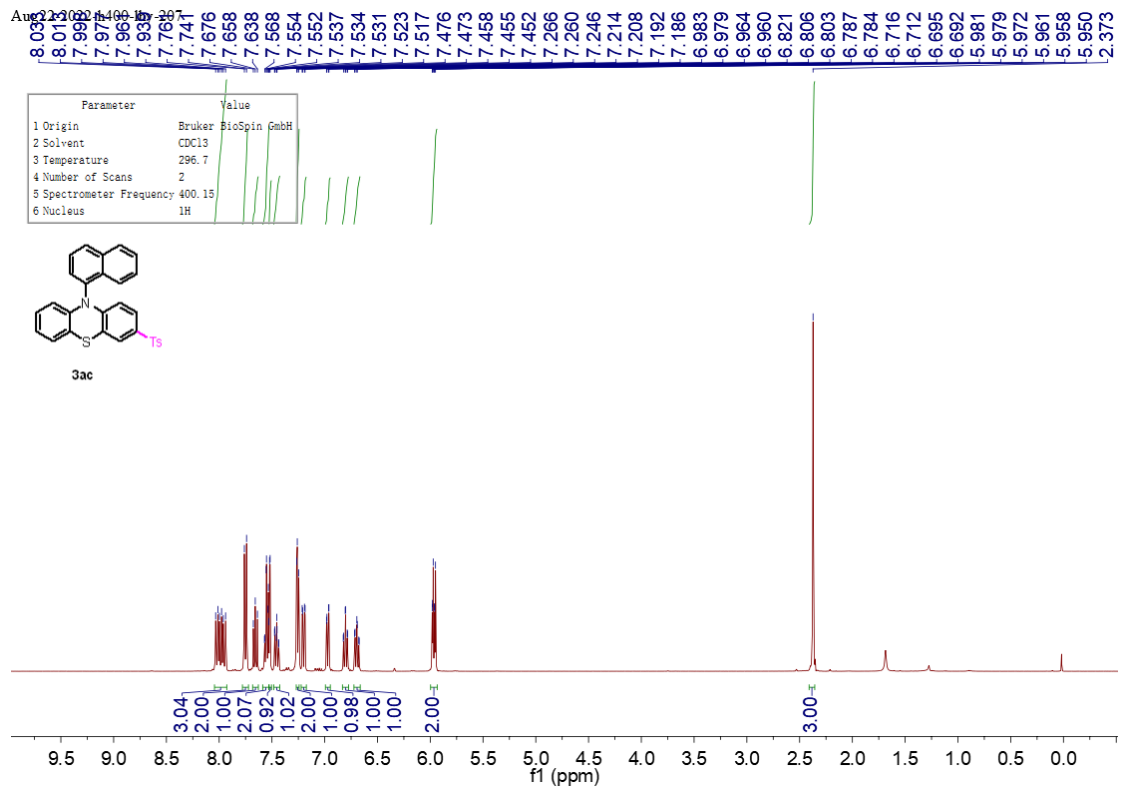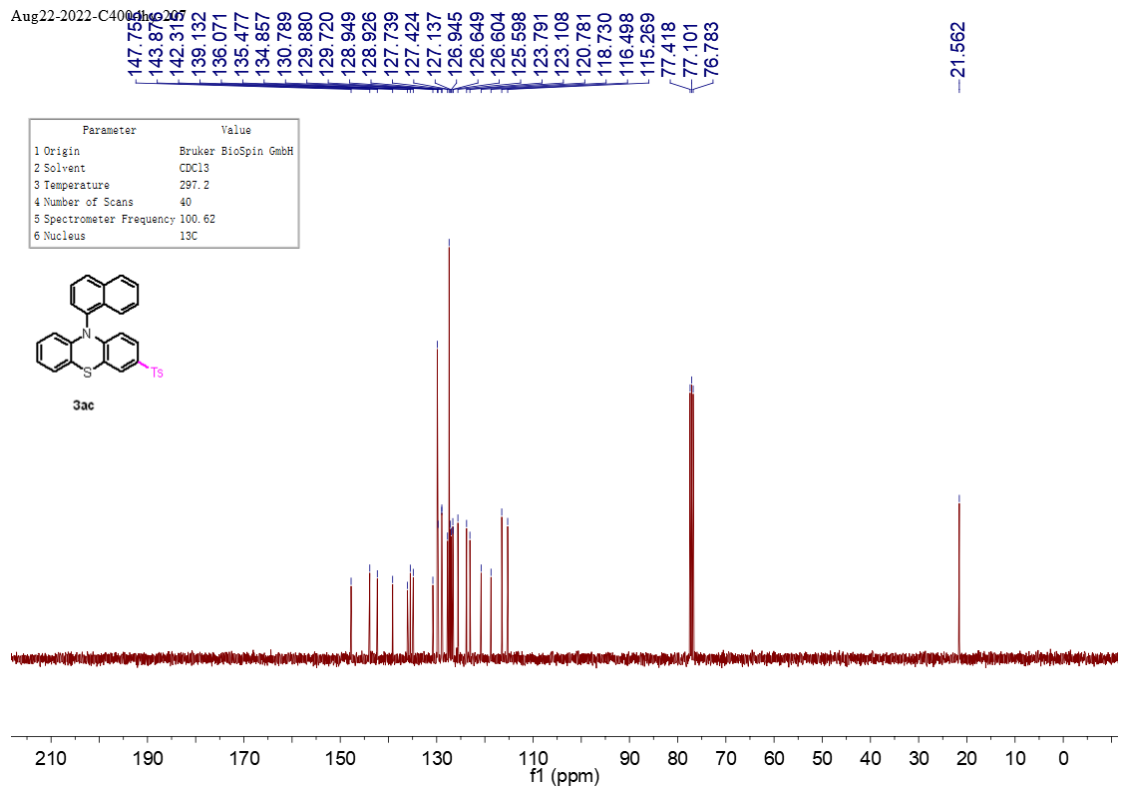

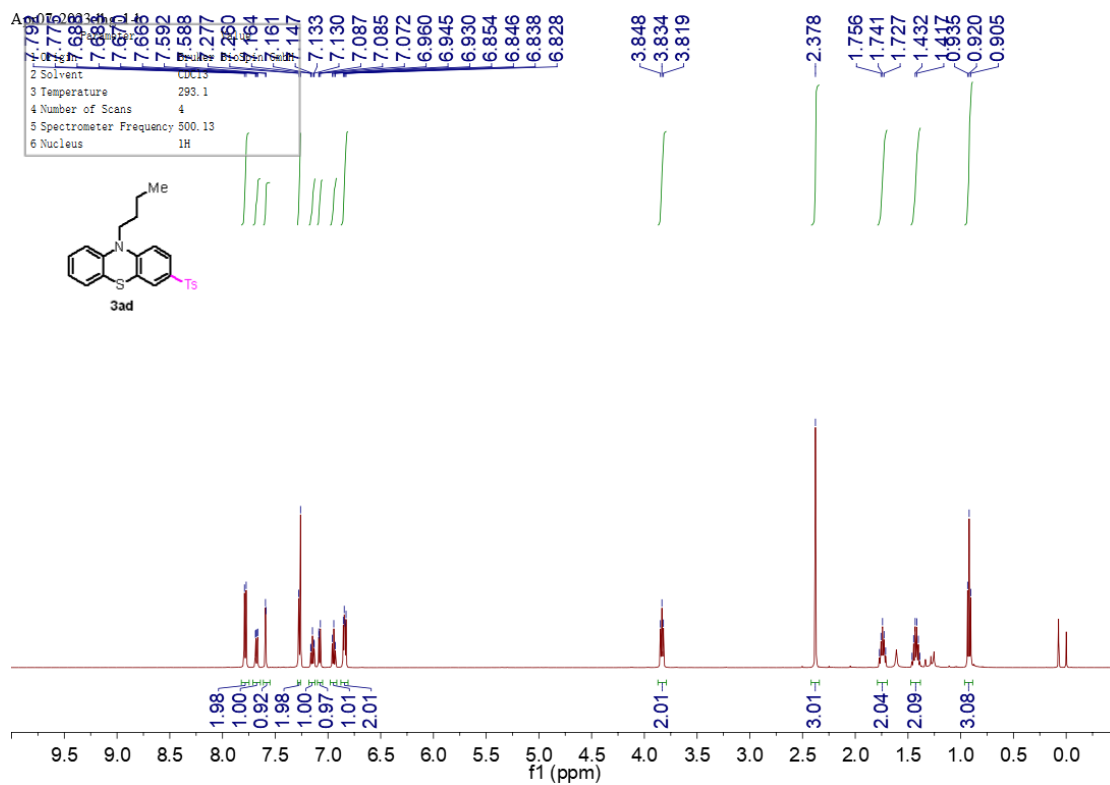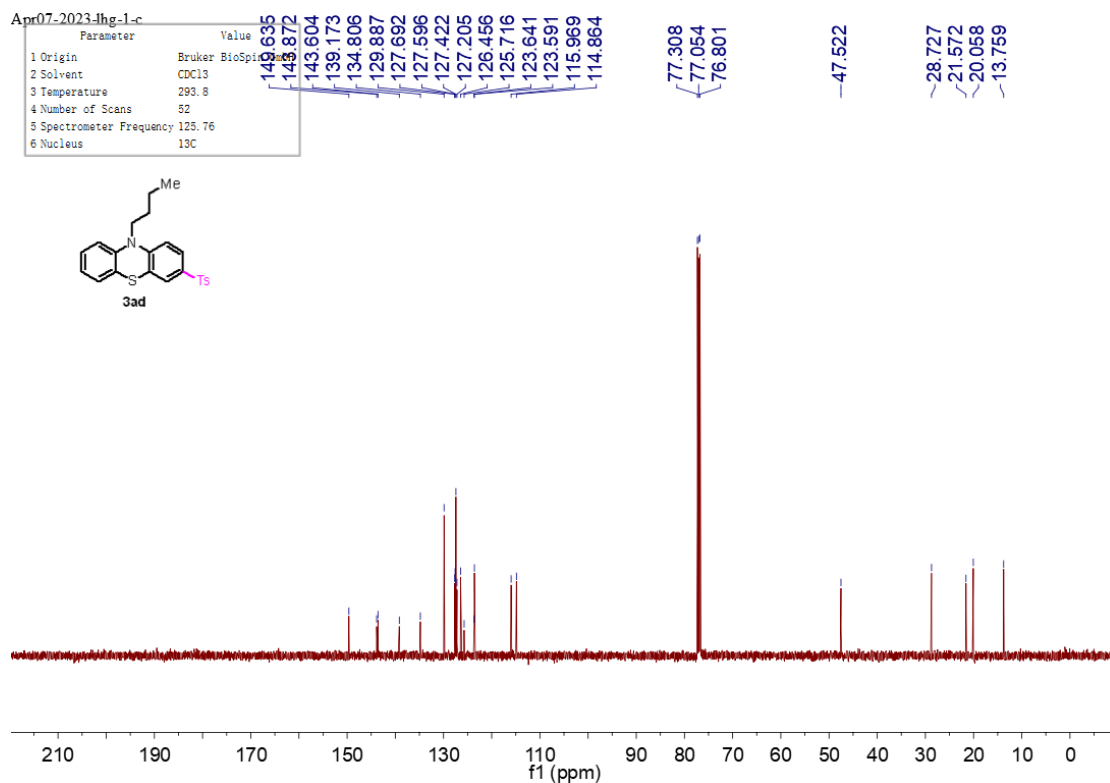

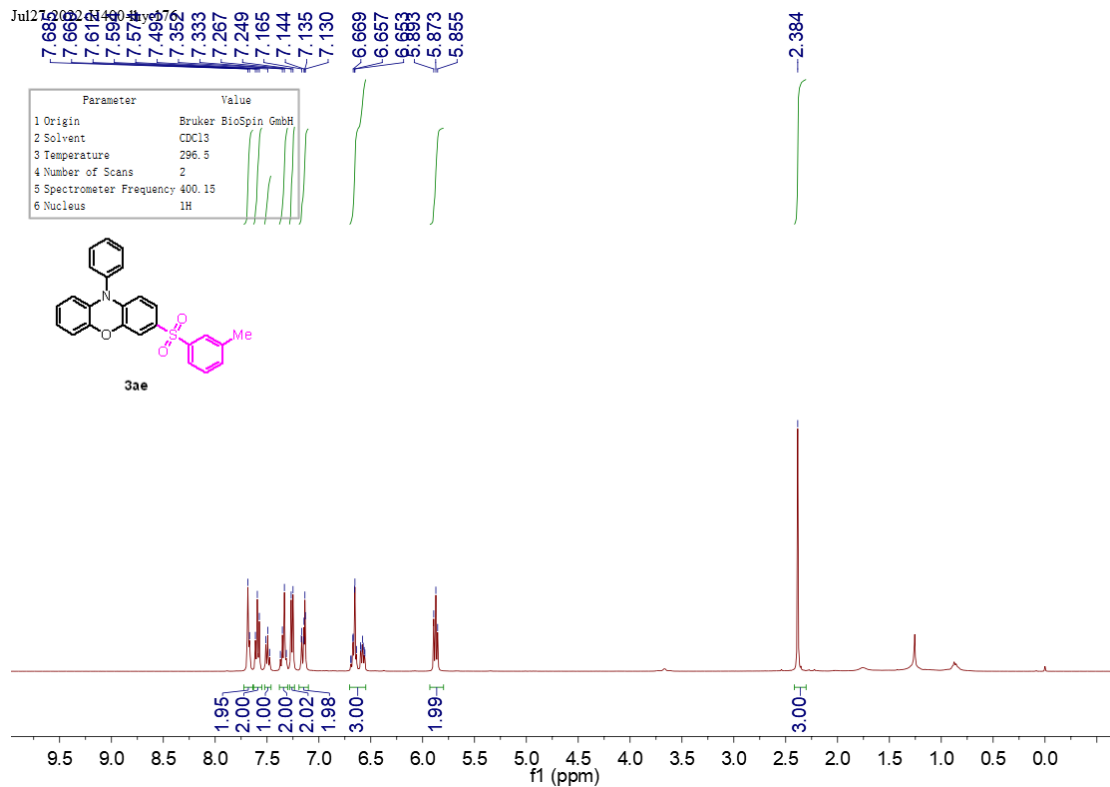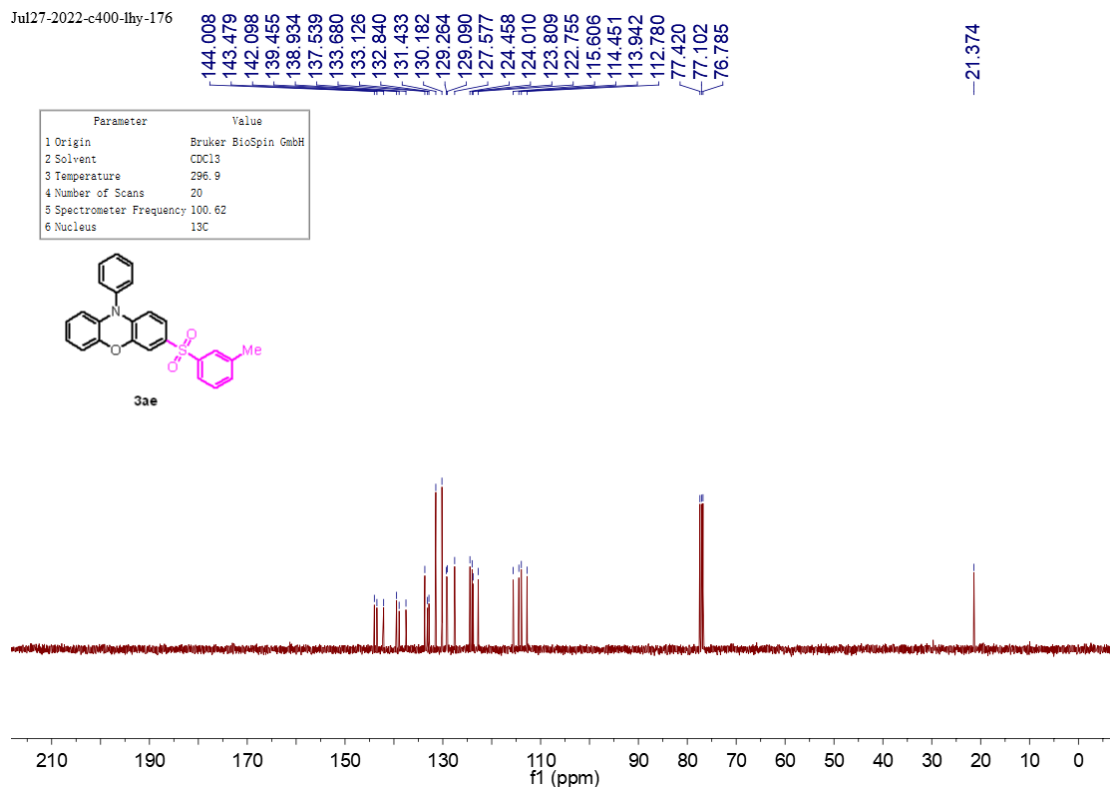

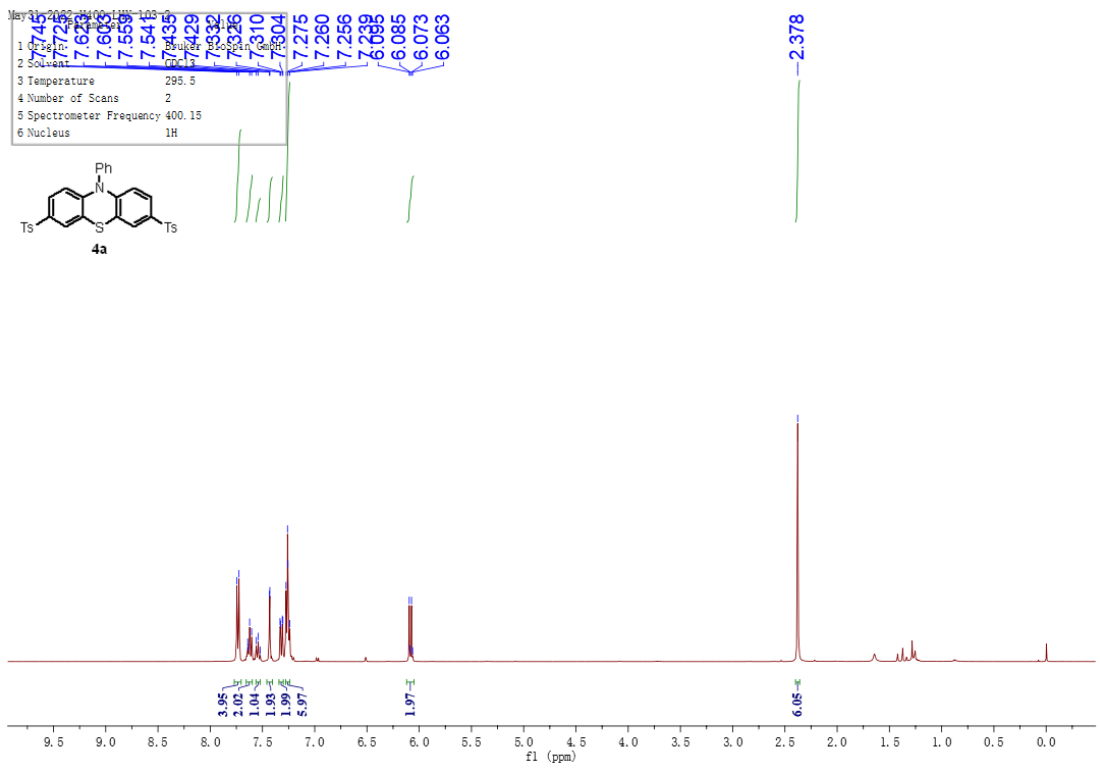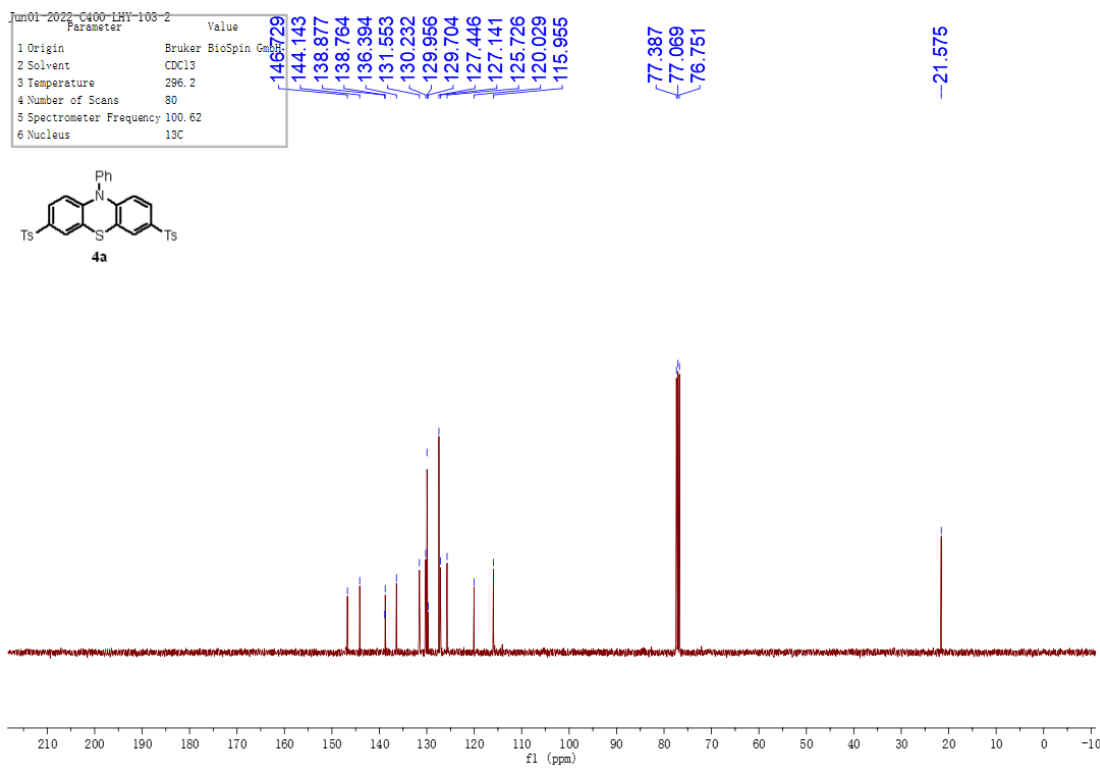

Jul29-2022-c400-lhy-180  
 7.8516, 7.8362, 7.6110, 7.5284, 7.5098, 7.453, 7.448, 7.436, 7.344, 7.339, 7.322, 7.317, 7.260, 7.254, 6.234, 6.112, 6.090

| Parameter                | Value               |
|--------------------------|---------------------|
| 1 Origin                 | Bruker BioSpin GmbH |
| 2 Solvent                | CDCl3               |
| 3 Temperature            | 298.1               |
| 4 Number of Scans        | 2                   |
| 5 Spectrometer Frequency | 400.13              |
| 6 Nucleus                | 1H                  |

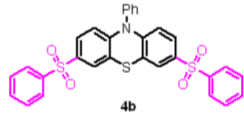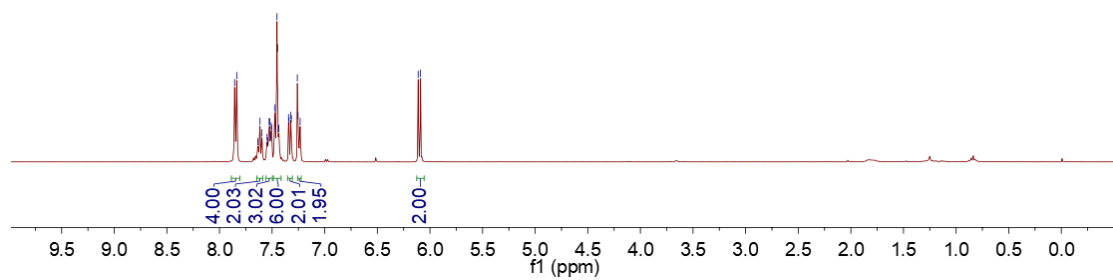

Jul29-2022-c400-lhy-180

146.865, 141.662, 138.747, 135.967, 133.189, 131.593, 130.168, 129.761, 129.343, 127.356, 125.836, 120.065, 116.075

77.480, 77.162, 76.842

| Parameter                | Value               |
|--------------------------|---------------------|
| 1 Origin                 | Bruker BioSpin GmbH |
| 2 Solvent                | CDCl3               |
| 3 Temperature            | 298.2               |
| 4 Number of Scans        | 20                  |
| 5 Spectrometer Frequency | 100.62              |
| 6 Nucleus                | 13C                 |

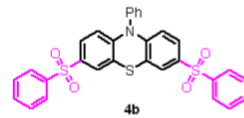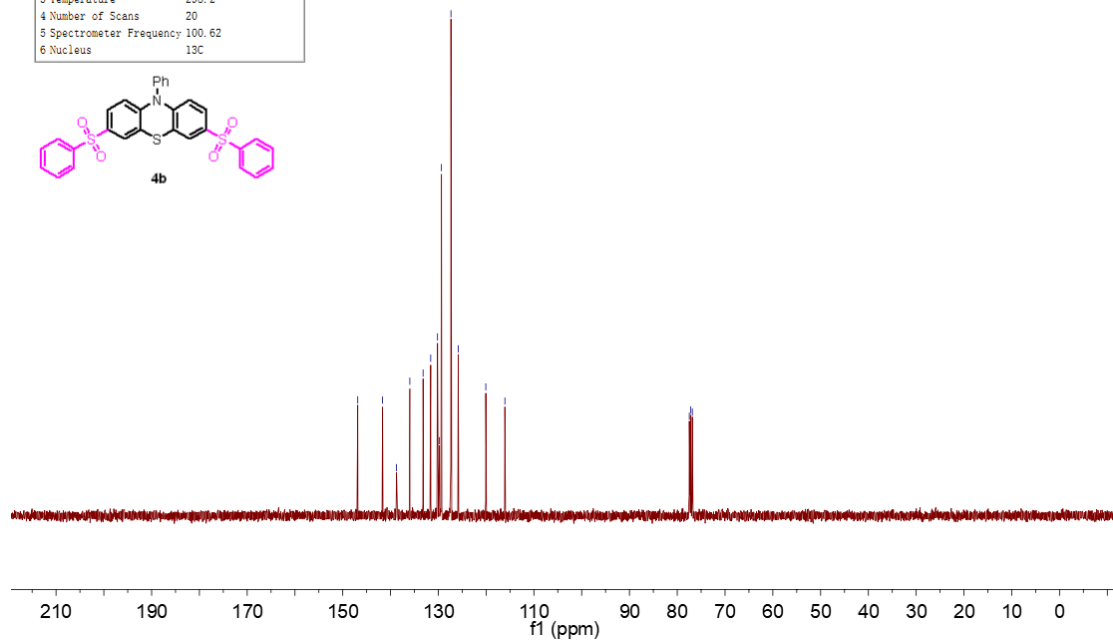

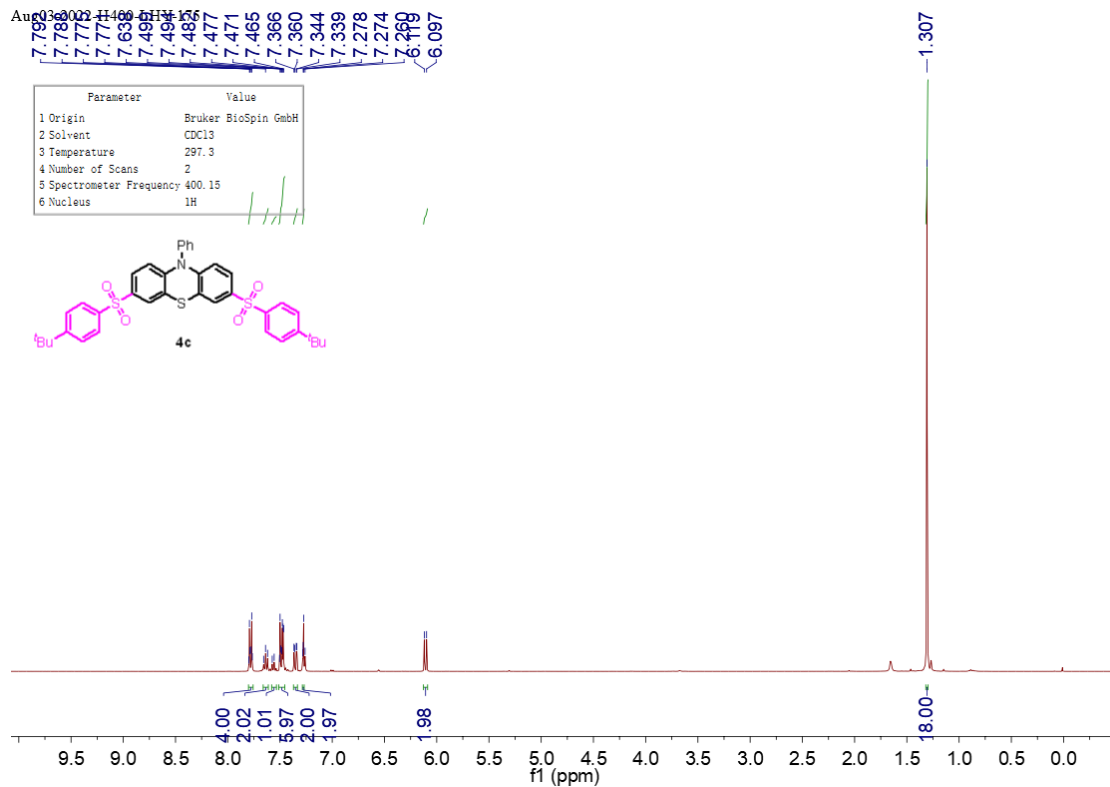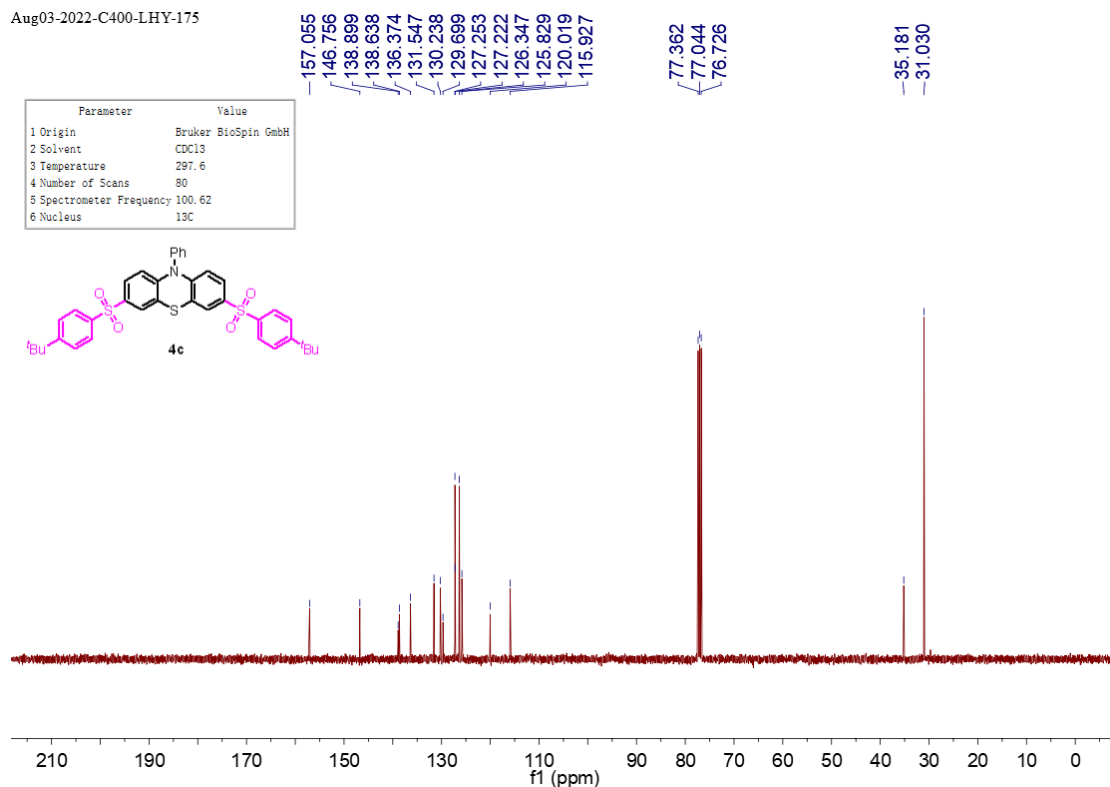

Aug04-2022-c400-1hy-186-1  
 7.935, 7.912, 7.687, 7.656, 7.630, 7.552, 7.534, 7.532, 7.506, 7.501, 7.451, 7.432, 7.398, 7.396, 7.390, 7.289, 6.137, 6.115

| Parameter                | Value               |
|--------------------------|---------------------|
| 1 Origin                 | Bruker BioSpin GmbH |
| 2 Solvent                | CDCl3               |
| 3 Temperature            | 297.0               |
| 4 Number of Scans        | 2                   |
| 5 Spectrometer Frequency | 400.13              |
| 6 Nucleus                | 1H                  |

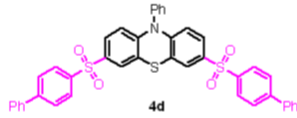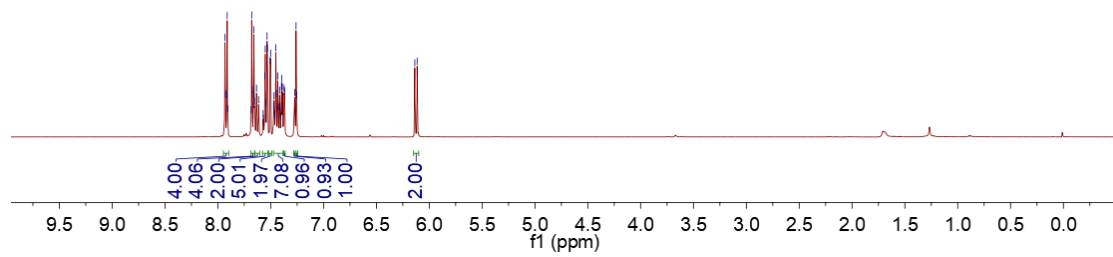

Aug04-2022-c400-1hy-186-1

146.872, 146.141, 140.220, 139.123, 138.821, 136.153, 131.599, 130.216, 129.761, 129.081, 128.622, 127.975, 127.944, 127.341, 125.863, 120.146, 116.076, 77.413, 77.096, 76.778

| Parameter                | Value               |
|--------------------------|---------------------|
| 1 Origin                 | Bruker BioSpin GmbH |
| 2 Solvent                | CDCl3               |
| 3 Temperature            | 297.8               |
| 4 Number of Scans        | 71                  |
| 5 Spectrometer Frequency | 100.61              |
| 6 Nucleus                | 13C                 |

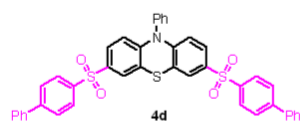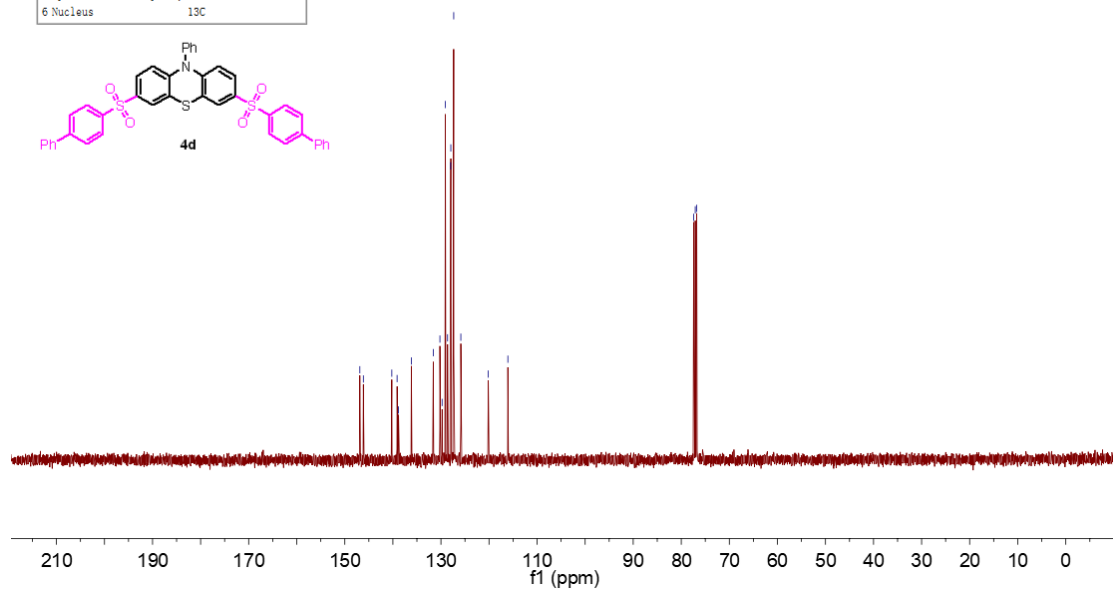

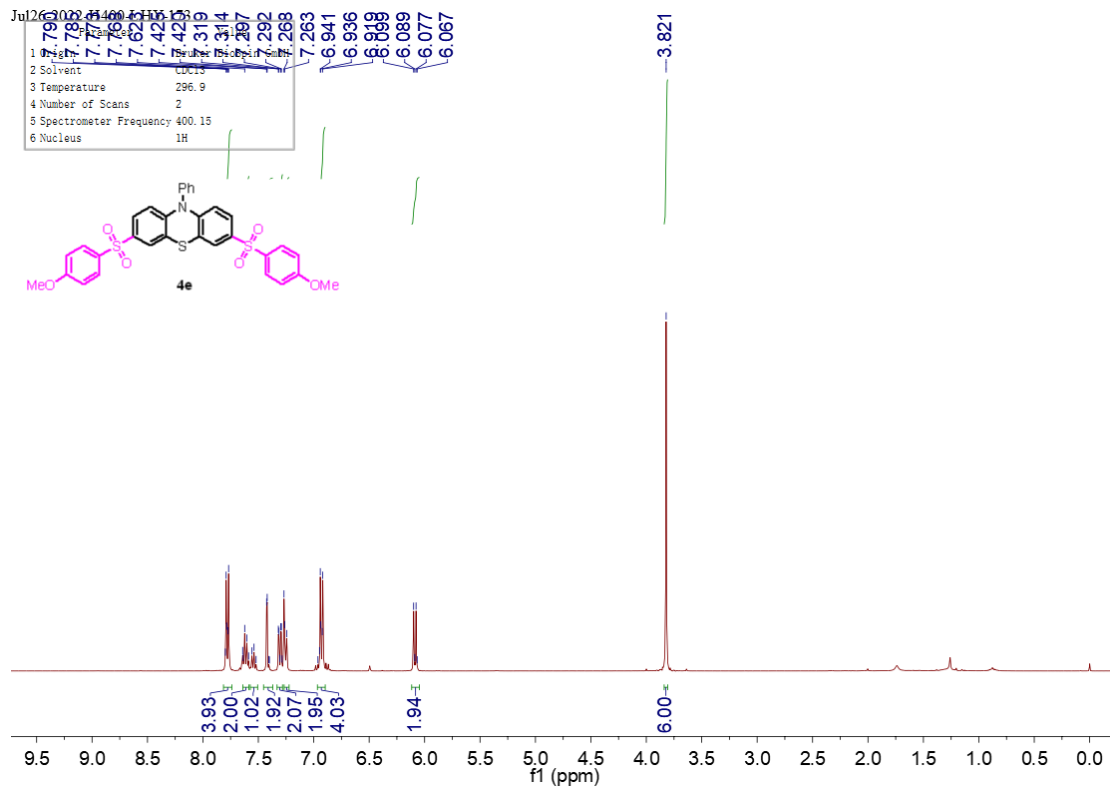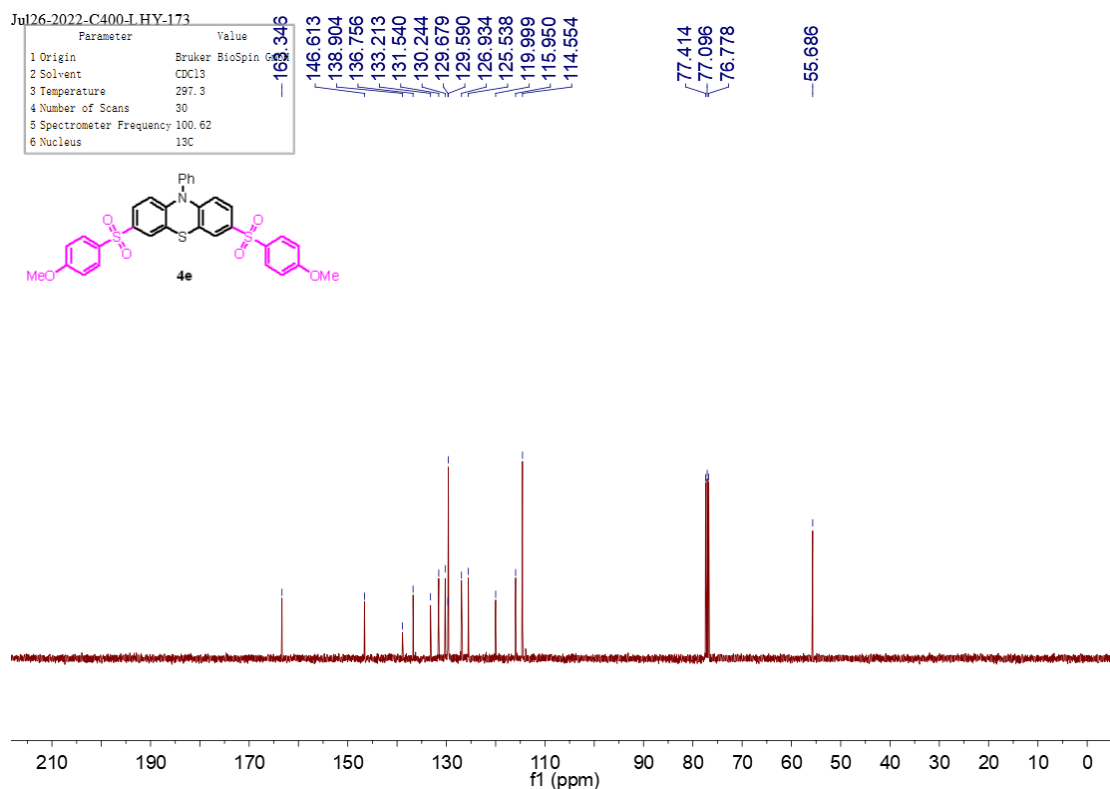



Jul29-2022-c400-lhy-181

| Parameter                | Value               |
|--------------------------|---------------------|
| 1 Origin                 | Bruker BioSpin GmbH |
| 2 Solvent                | CDCl3               |
| 3 Temperature            | 298.2               |
| 4 Number of Scans        | 2                   |
| 5 Spectrometer Frequency | 400.13              |
| 6 Nucleus                | 1H                  |

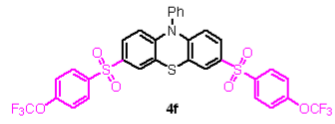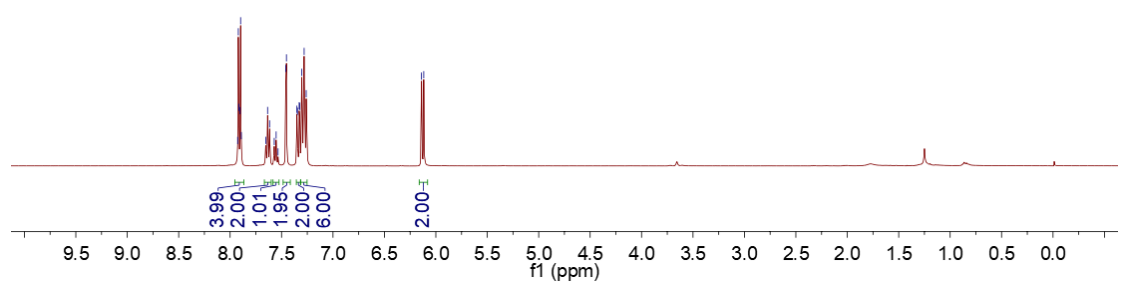

Jul29-2022-c400-lhy-181

152.484  
152.465  
147.089  
140.051  
138.654  
135.483  
131.651  
130.113  
129.855  
129.621  
127.476  
125.900  
124.028  
121.447  
121.153  
120.257  
118.866  
116.284  
116.194  
77.398  
77.079  
76.762

| Parameter                | Value               |
|--------------------------|---------------------|
| 1 Origin                 | Bruker BioSpin GmbH |
| 2 Solvent                | CDCl3               |
| 3 Temperature            | 298.2               |
| 4 Number of Scans        | 1024                |
| 5 Spectrometer Frequency | 100.61              |
| 6 Nucleus                | 13C                 |

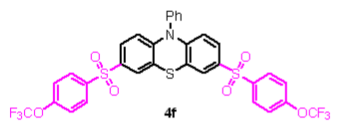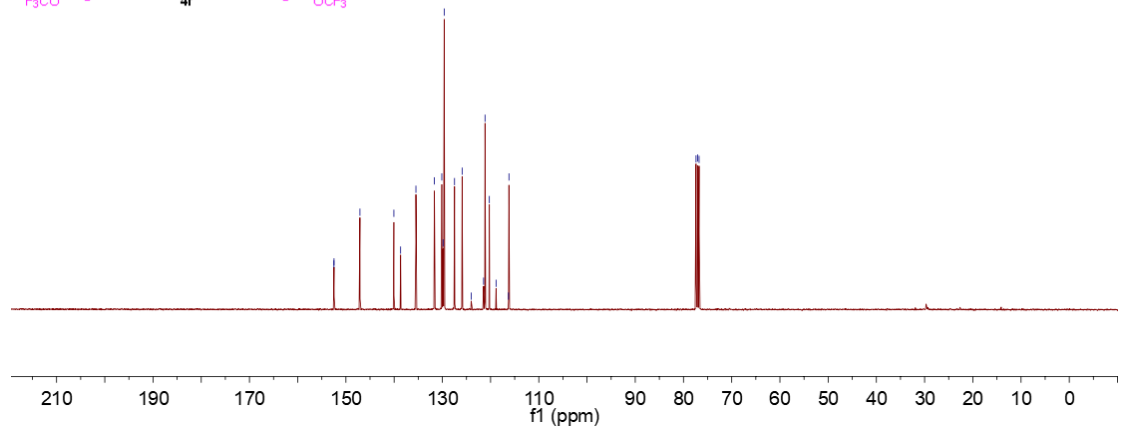

Aug01-2022-H400-LHY-181

| Parameter                | Value               |
|--------------------------|---------------------|
| 1 Origin                 | Bruker BioSpin GmbH |
| 2 Solvent                | CDCl3               |
| 3 Temperature            | 296.6               |
| 4 Number of Scans        | 2                   |
| 5 Spectrometer Frequency | 376.52              |
| 6 Nucleus                | 19F                 |

--57.703

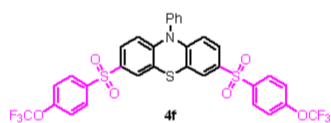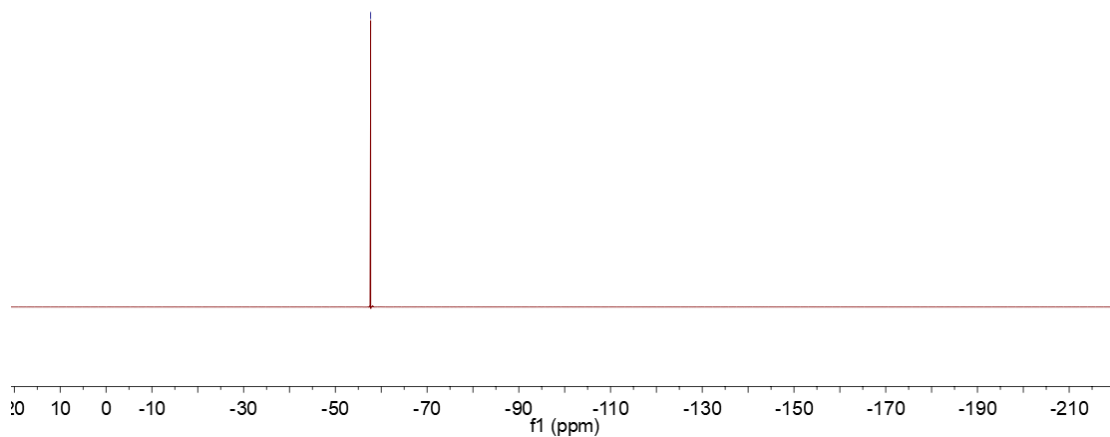

Aug16-2022-H400-LHY-187

| Parameter                | Value               |
|--------------------------|---------------------|
| 1 Origin                 | Bruker BioSpin GmbH |
| 2 Solvent                | CDCl3               |
| 3 Temperature            | 298.2               |
| 4 Number of Scans        | 2                   |
| 5 Spectrometer Frequency | 400.13              |
| 6 Nucleus                | 1H                  |

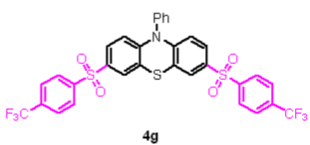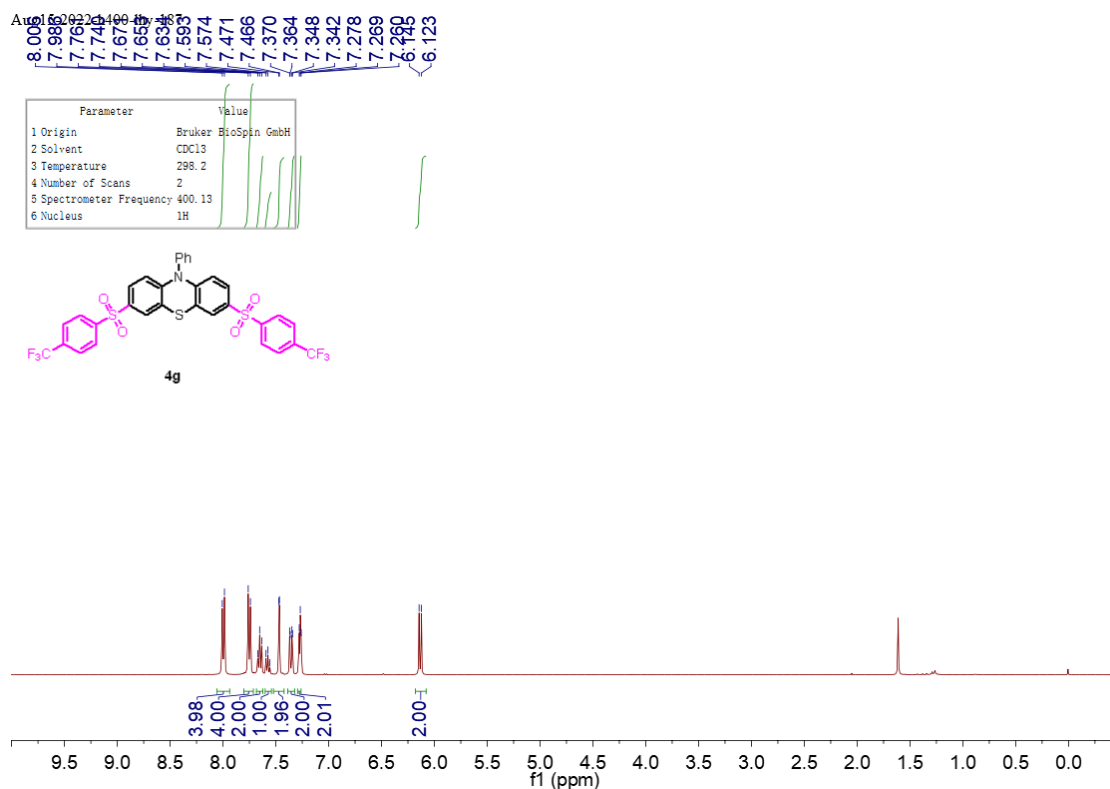

Aug17-2022-C400-LHY-187

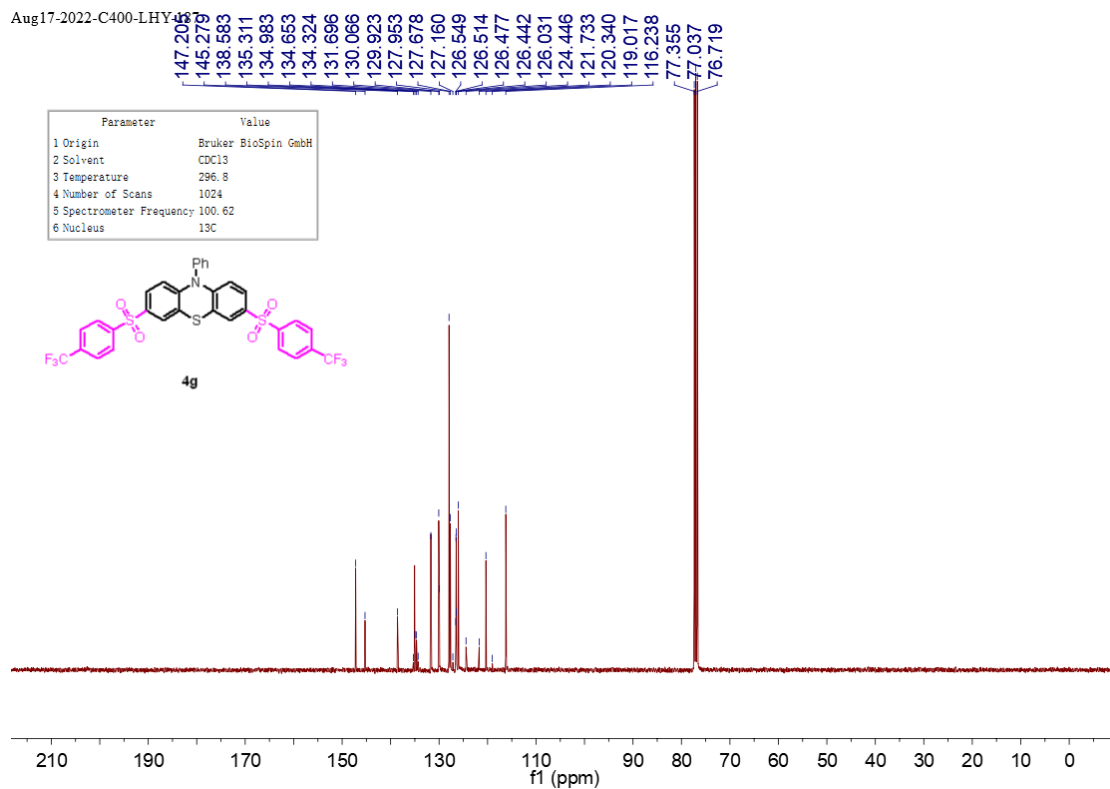

Aug15-2022-f400-lhy-187

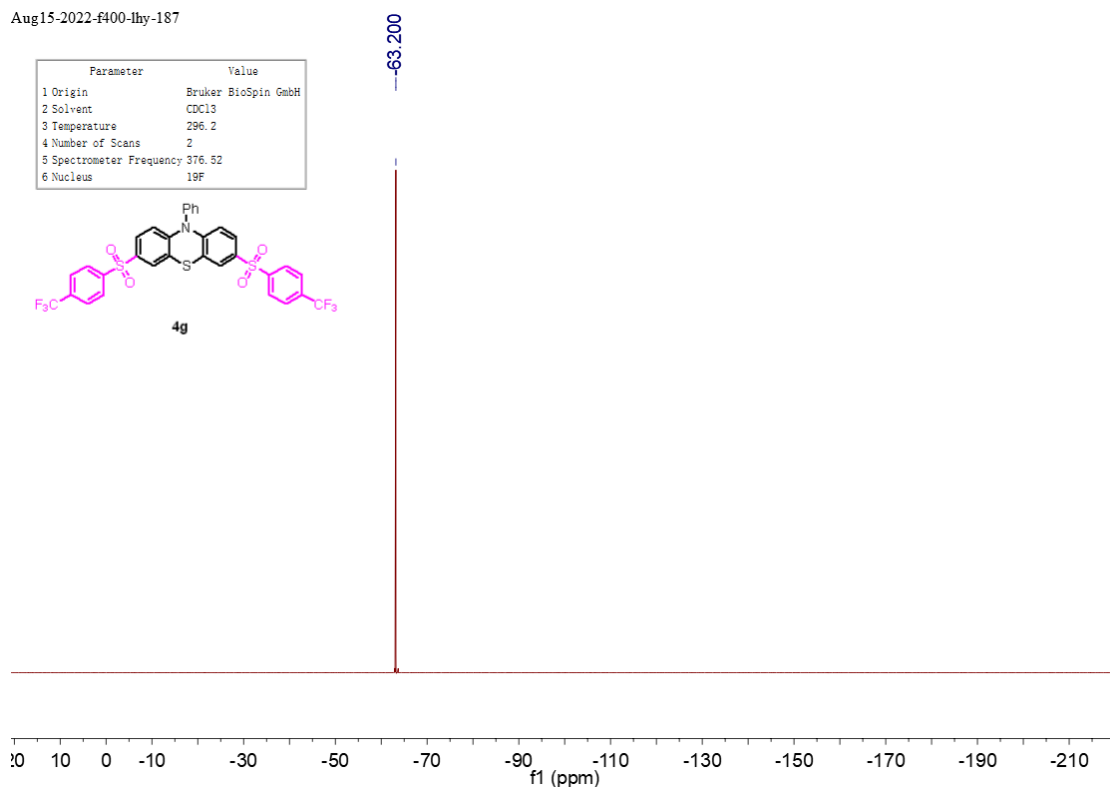

Jul25-2022-H400-LHY-170

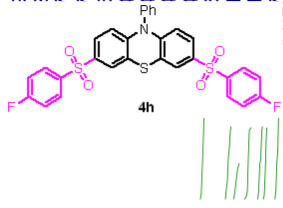

| Parameter                | Value               |
|--------------------------|---------------------|
| 1 Origin                 | Bruker BioSpin GmbH |
| 2 Solvent                | CDCl3               |
| 3 Temperature            | 296.8               |
| 4 Number of Scans        | 2                   |
| 5 Spectrometer Frequency | 400.15              |
| 6 Nucleus                | 1H                  |

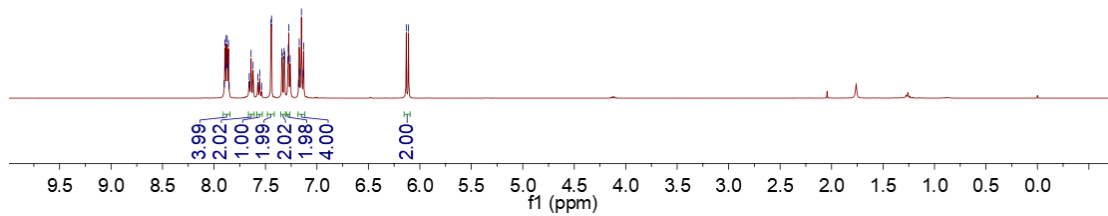

Jul25-2022-H400-LHY-170

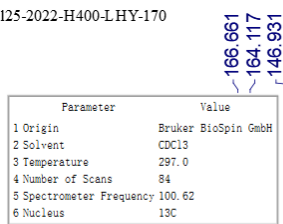

| Parameter                | Value               |
|--------------------------|---------------------|
| 1 Origin                 | Bruker BioSpin GmbH |
| 2 Solvent                | CDCl3               |
| 3 Temperature            | 297.0               |
| 4 Number of Scans        | 84                  |
| 5 Spectrometer Frequency | 100.62              |
| 6 Nucleus                | 13C                 |

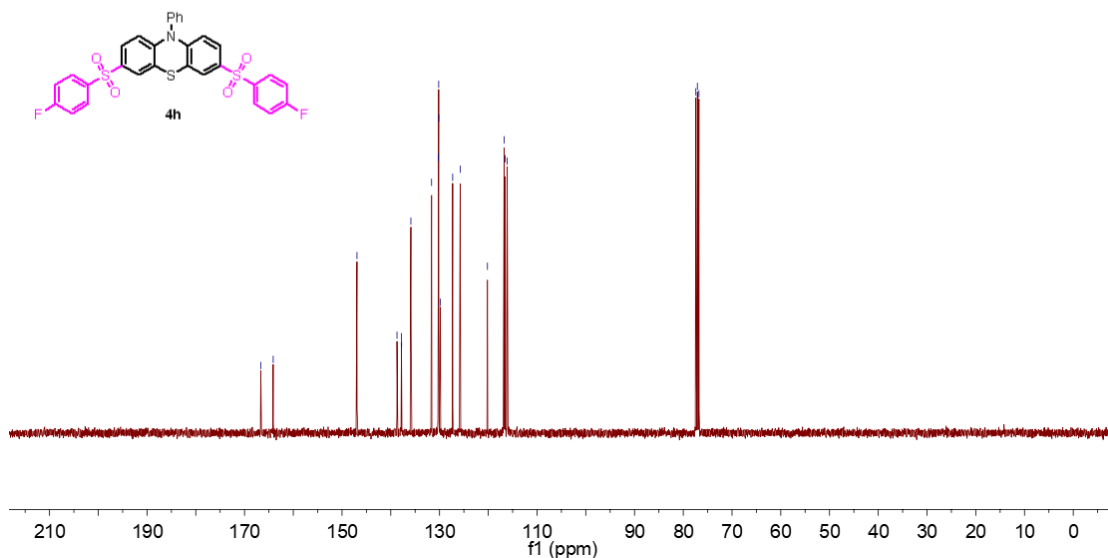

Jul25-2022-H400-LHY-170

| Parameter                | Value               |
|--------------------------|---------------------|
| 1 Origin                 | Bruker BioSpin GmbH |
| 2 Solvent                | CDCl3               |
| 3 Temperature            | 296.8               |
| 4 Number of Scans        | 2                   |
| 5 Spectrometer Frequency | 376.52              |
| 6 Nucleus                | 19F                 |

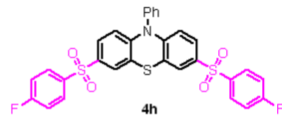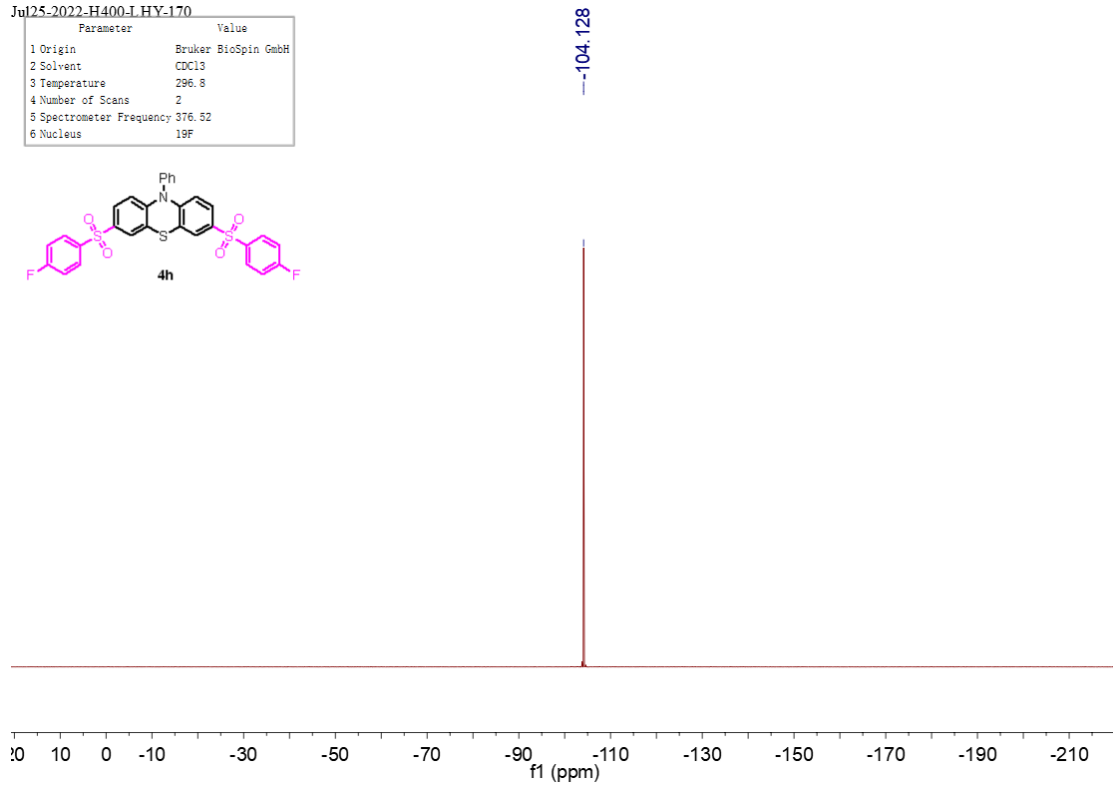

Jul25-2022-H400-LHY-170

7.802  
7.801  
7.786  
7.786  
7.641  
7.625  
7.454  
7.454  
7.443  
7.437  
7.341  
7.335  
7.319  
7.314  
7.278  
7.276  
6.782  
6.110

| Parameter                | Value               |
|--------------------------|---------------------|
| 1 Origin                 | Bruker BioSpin GmbH |
| 2 Solvent                | CDCl3               |
| 3 Temperature            | 296.8               |
| 4 Number of Scans        | 2                   |
| 5 Spectrometer Frequency | 400.15              |
| 6 Nucleus                | 1H                  |

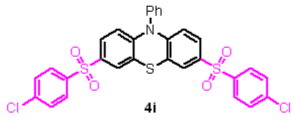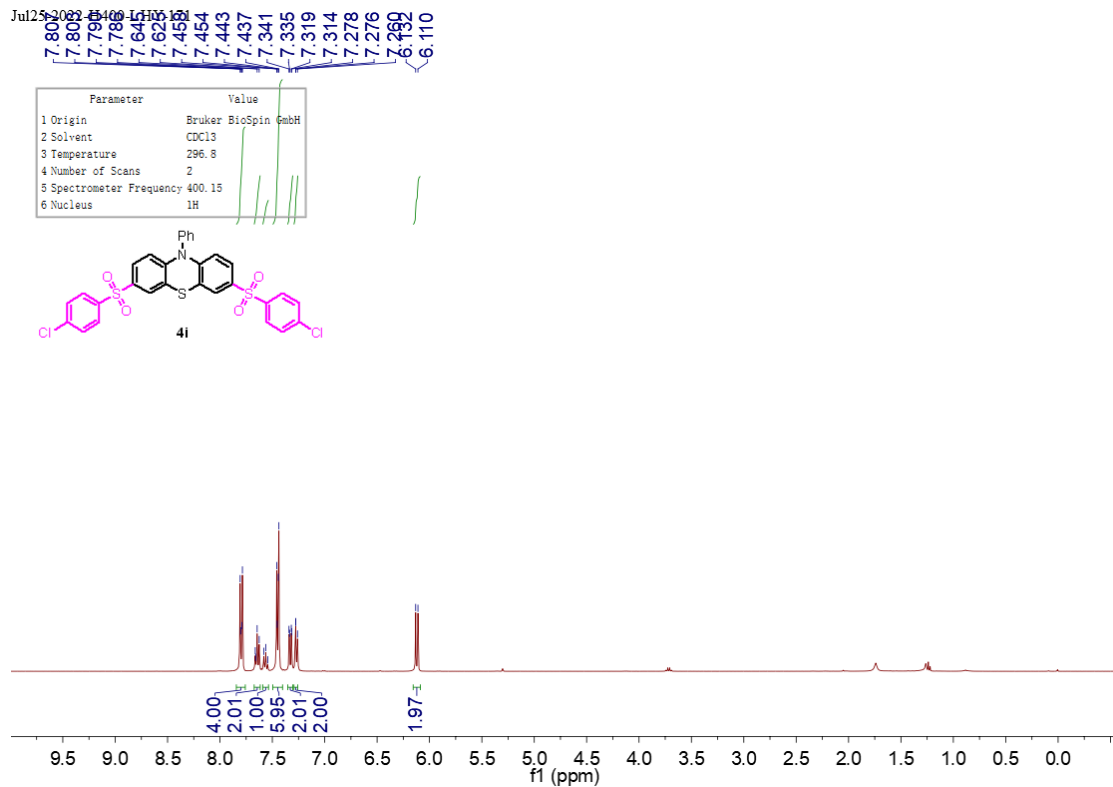

Jul25-2022-H400-LHY-171

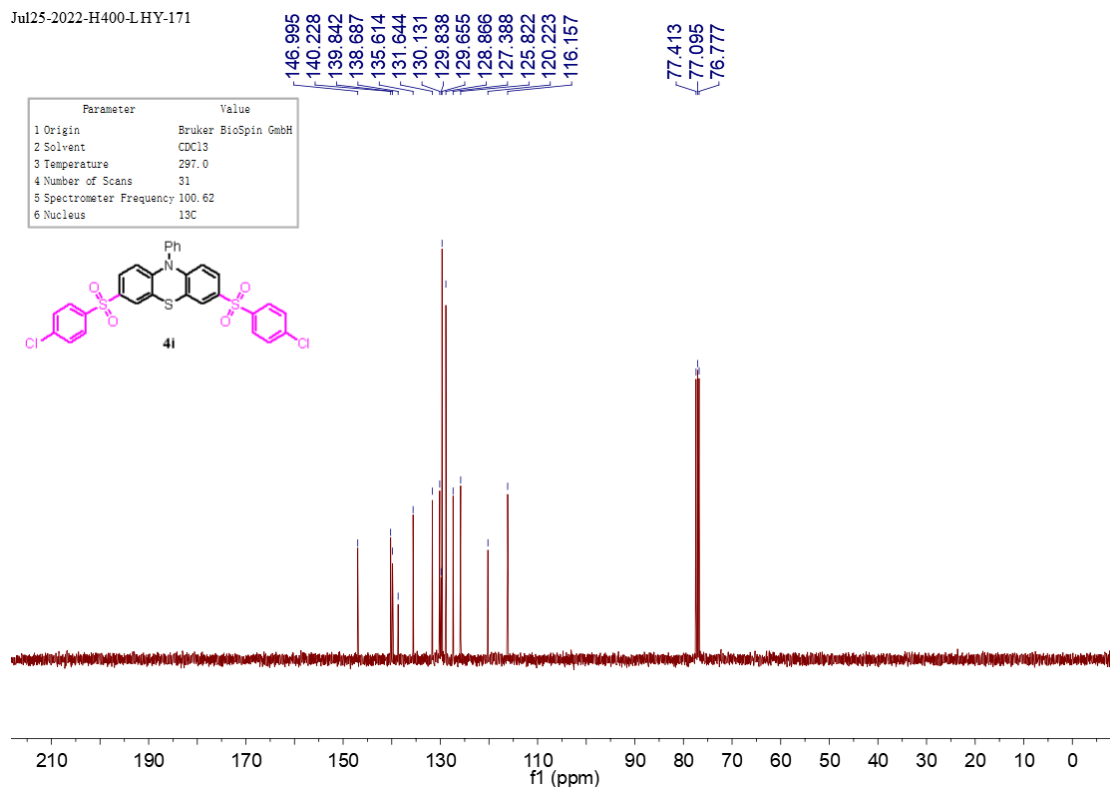

Jul26-2022-H400-LHY-171

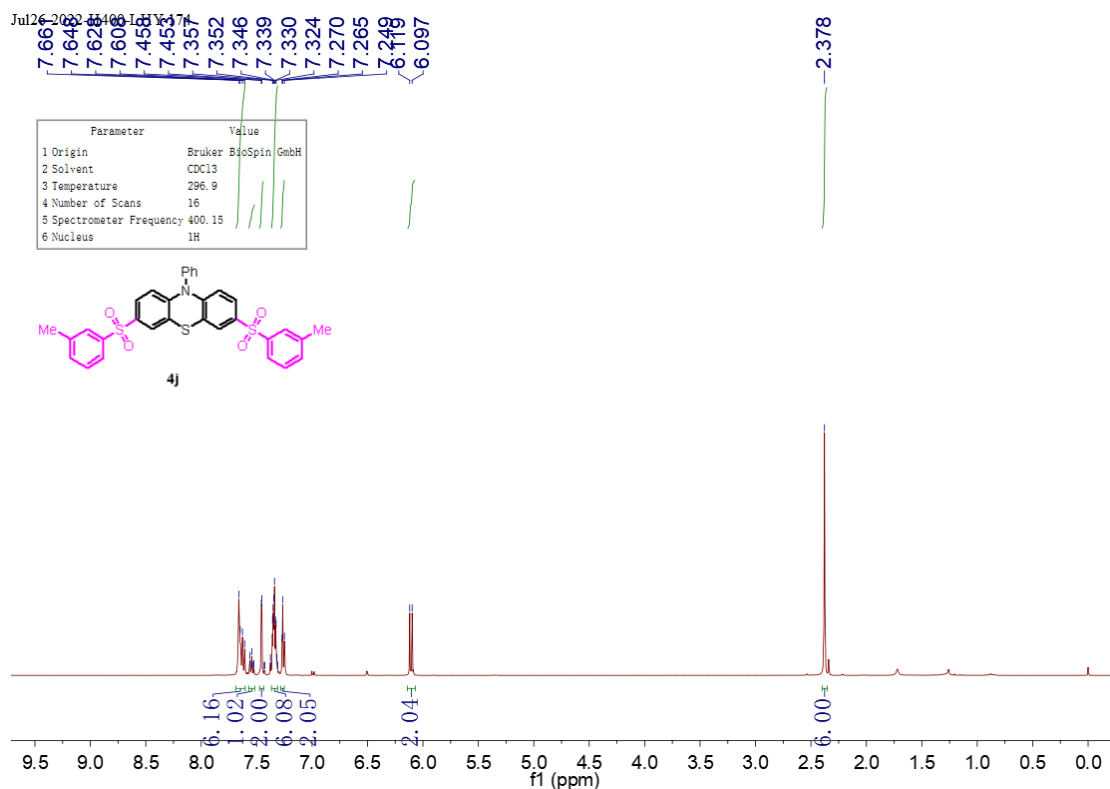

Jul26-2022-C400-LHY-174

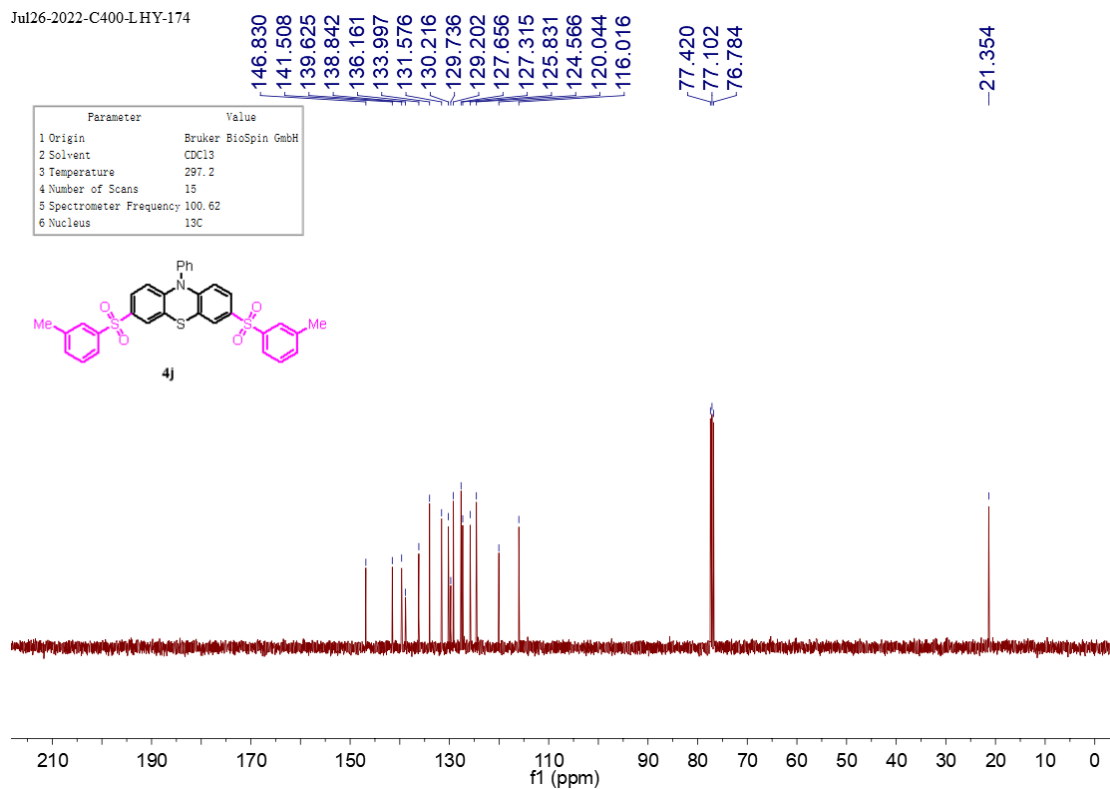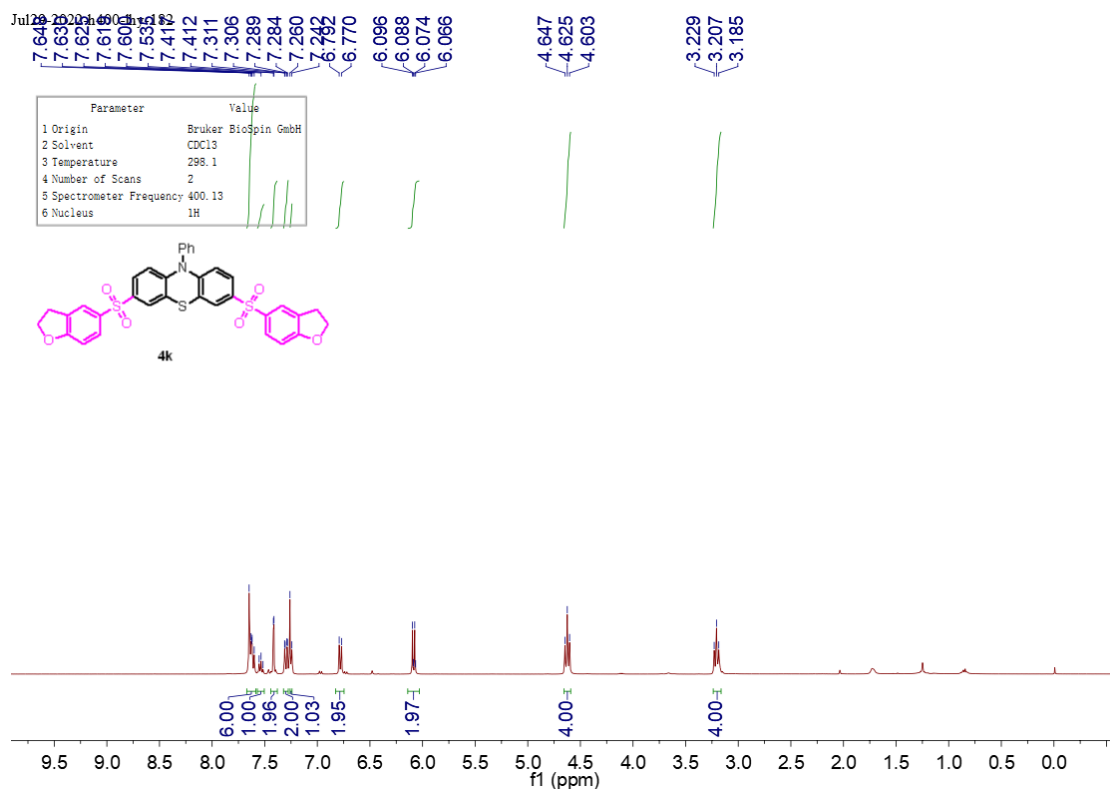

Jul29-2022-C400-LHY-182

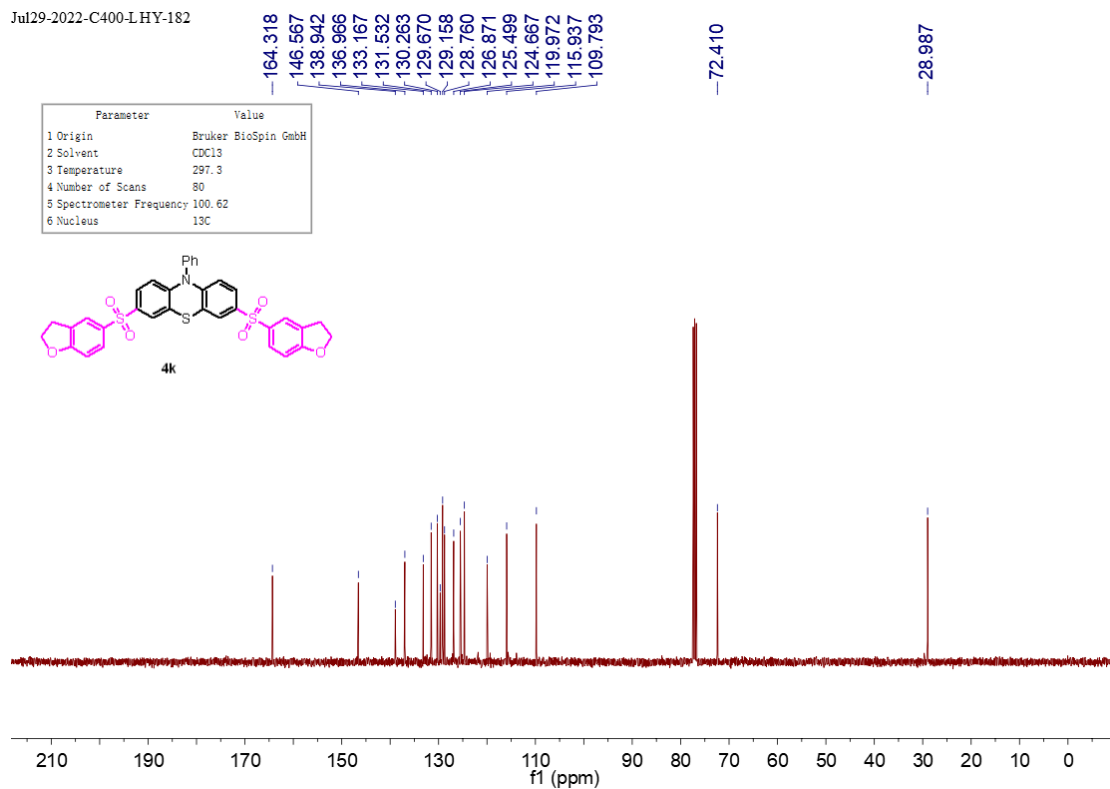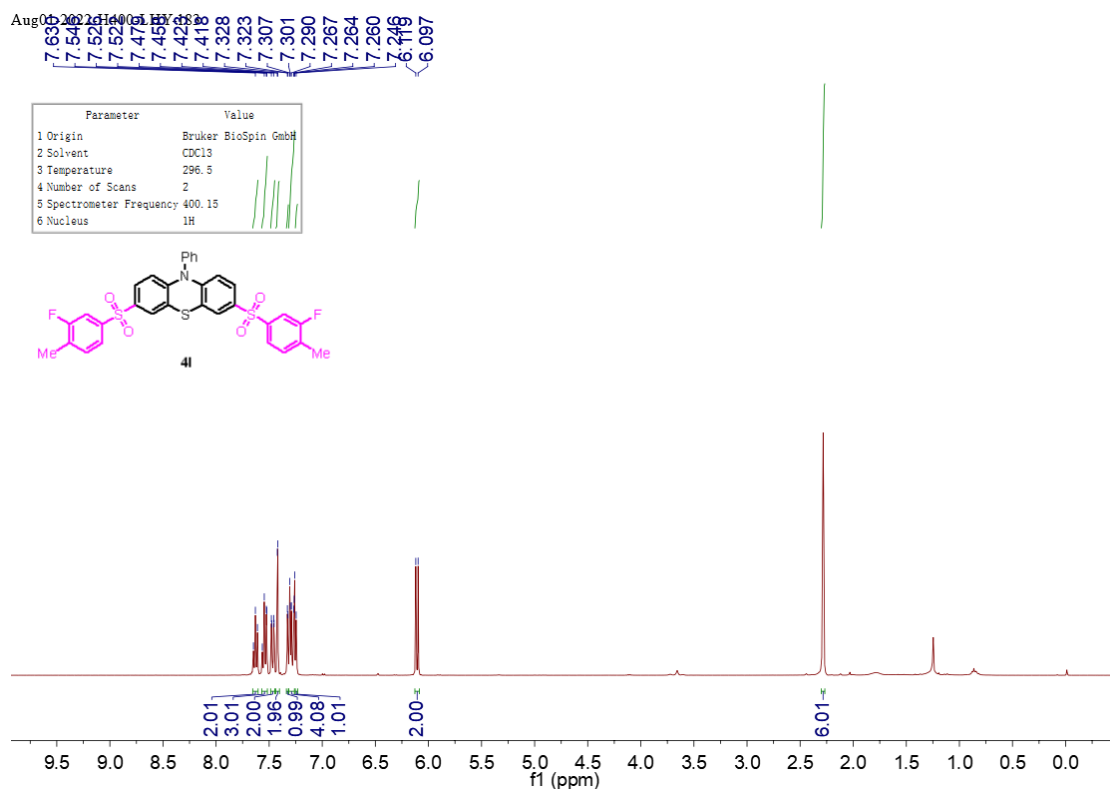



Aug01-2022-C400-LHY-183

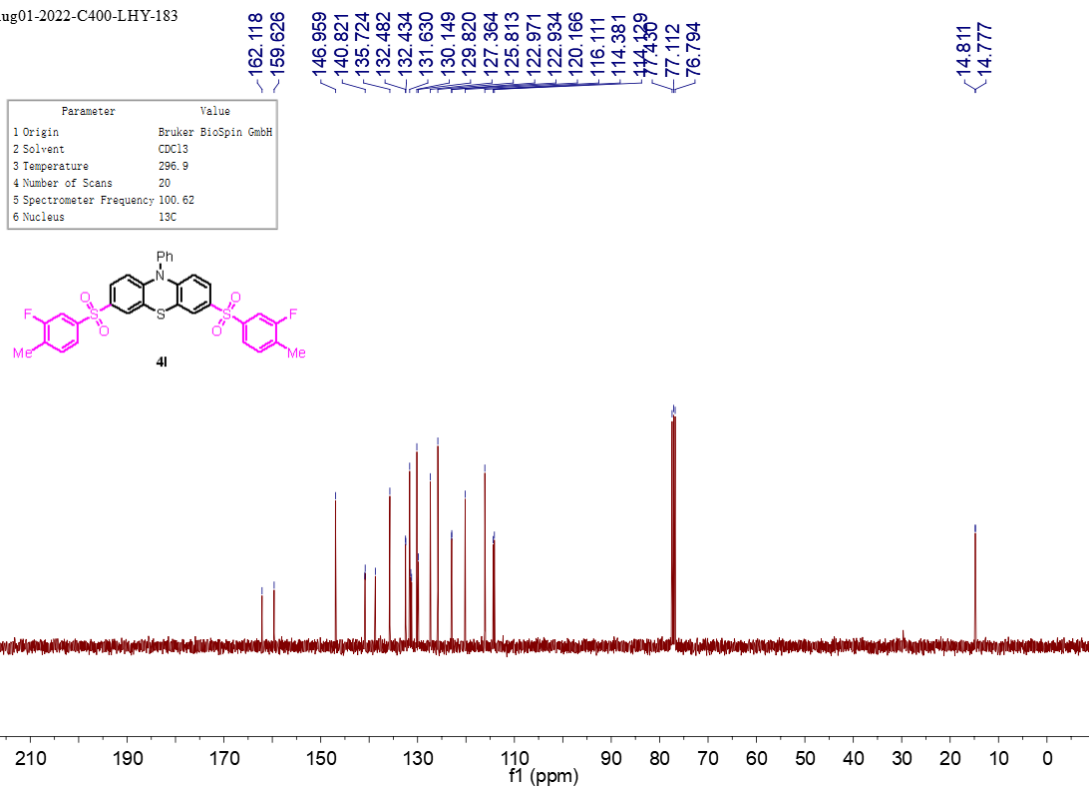

Aug01-2022-F400-LHY-183

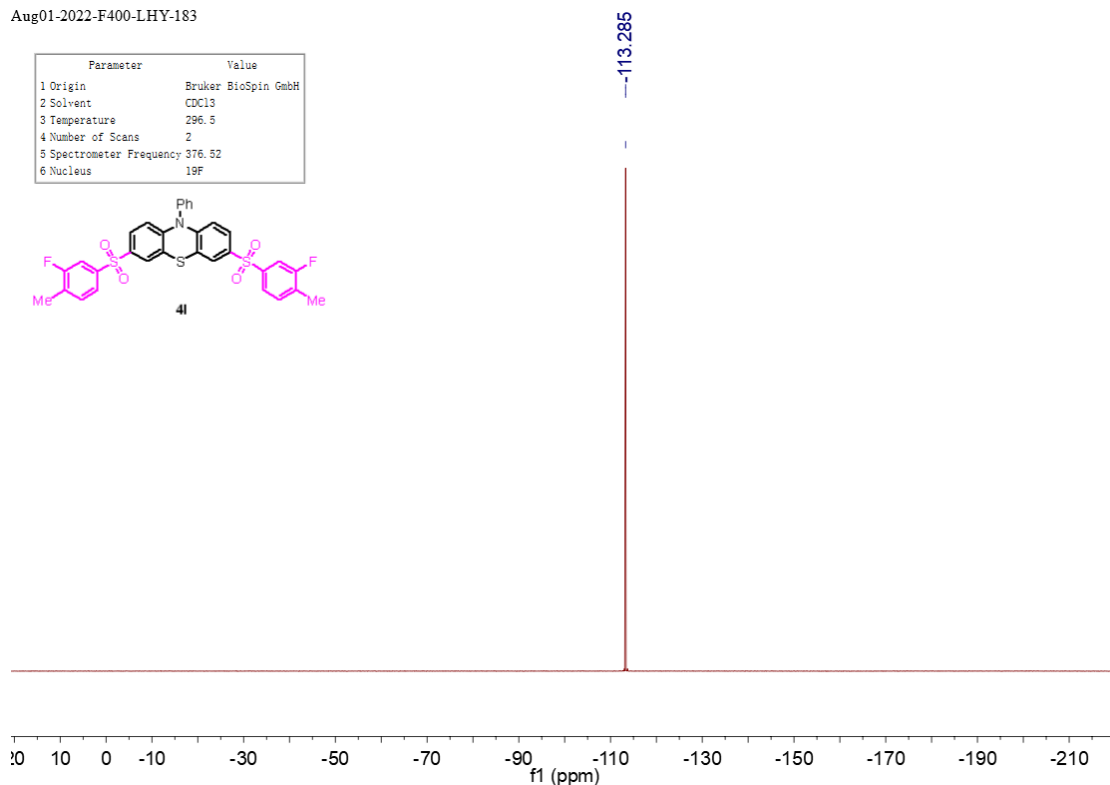

Aug05-2022-C400-LHY-184

| Parameter                | Value               |
|--------------------------|---------------------|
| 1 Origin                 | Bruker BioSpin GmbH |
| 2 Solvent                | CDCl3               |
| 3 Temperature            | 298.2               |
| 4 Number of Scans        | 2                   |
| 5 Spectrometer Frequency | 400.13              |
| 6 Nucleus                | 1H                  |

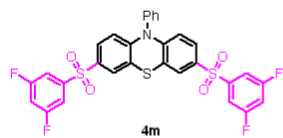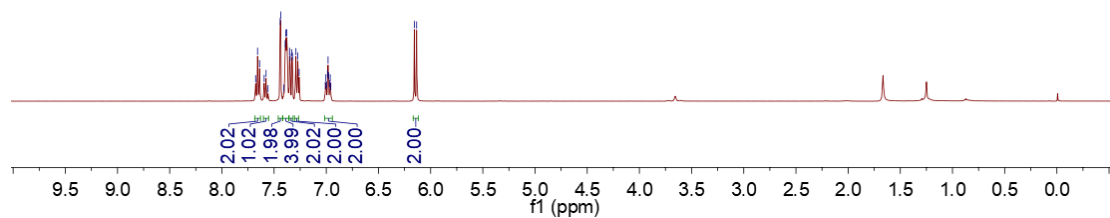

Aug05-2022-C400-LHY-184

| Parameter                | Value               |
|--------------------------|---------------------|
| 1 Origin                 | Bruker BioSpin GmbH |
| 2 Solvent                | CDCl3               |
| 3 Temperature            | 297.0               |
| 4 Number of Scans        | 1024                |
| 5 Spectrometer Frequency | 100.62              |
| 6 Nucleus                | 13C                 |

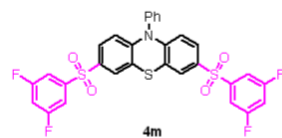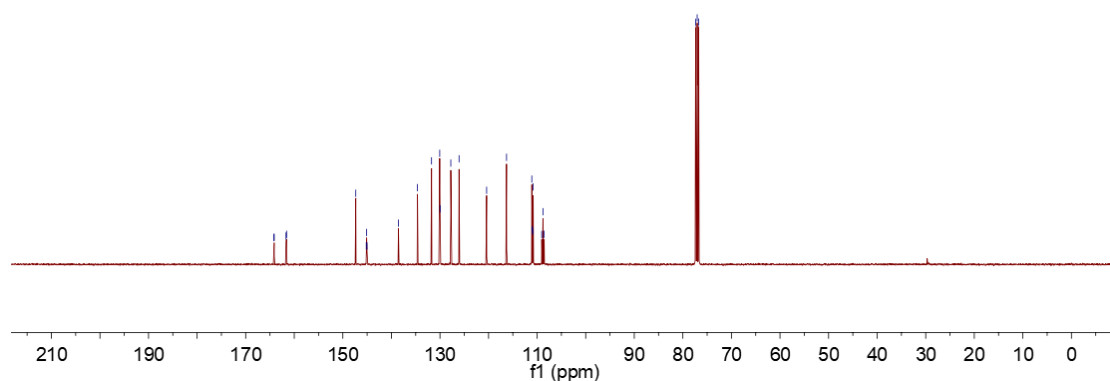

Aug01-2022-F400-LHY-184

| Parameter                | Value               |
|--------------------------|---------------------|
| 1 Origin                 | Bruker BioSpin GmbH |
| 2 Solvent                | CDCl3               |
| 3 Temperature            | 296.6               |
| 4 Number of Scans        | 16                  |
| 5 Spectrometer Frequency | 376.52              |
| 6 Nucleus                | 19F                 |

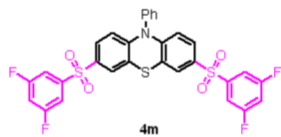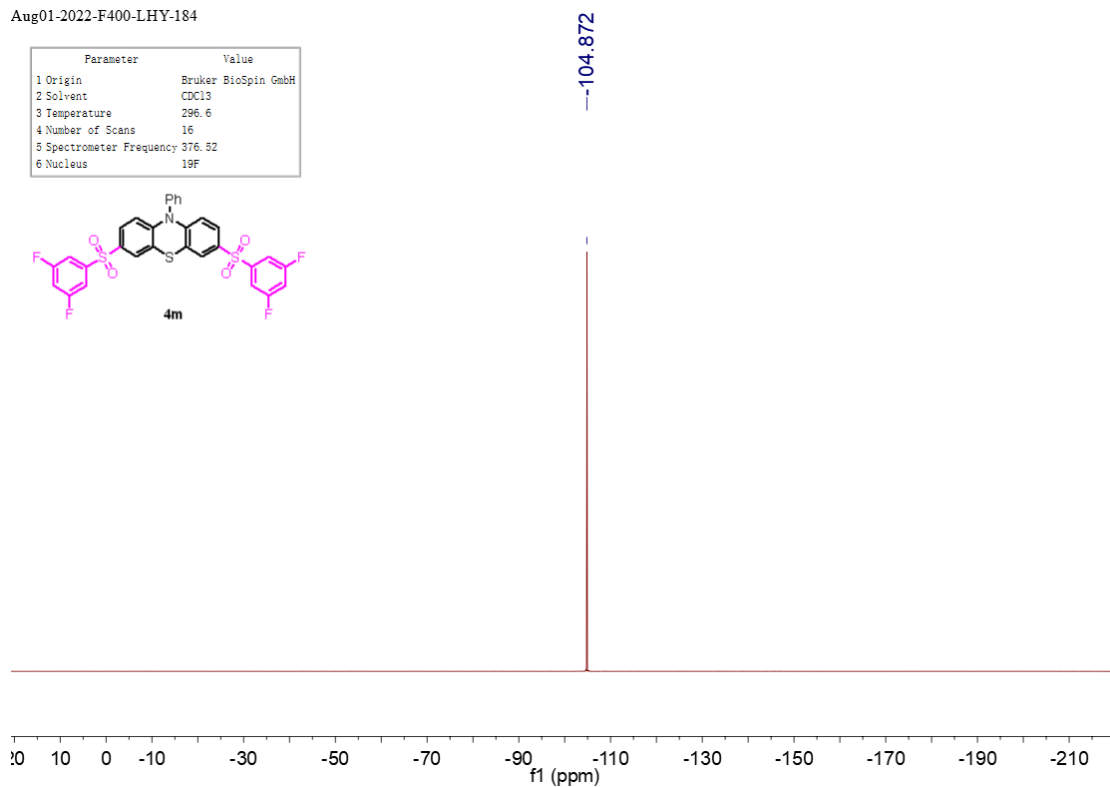

Jul28-2022-h400-lhy-179

| Parameter                | Value               |
|--------------------------|---------------------|
| 1 Origin                 | Bruker BioSpin GmbH |
| 2 Solvent                | CDCl3               |
| 3 Temperature            | 298.1               |
| 4 Number of Scans        | 2                   |
| 5 Spectrometer Frequency | 400.13              |
| 6 Nucleus                | 1H                  |

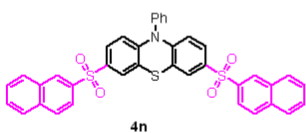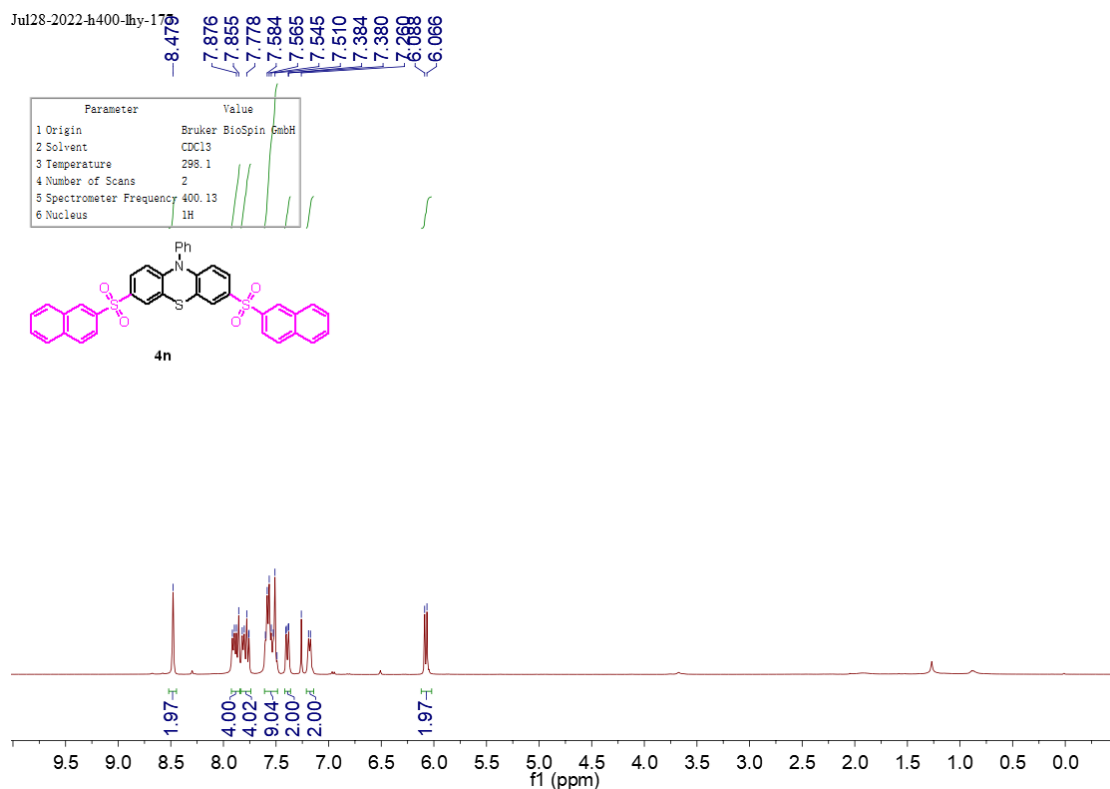

Jul28-2022-c400-lhy-177

146.820  
138.738  
138.494  
136.042  
134.942  
132.199  
131.576  
130.154  
129.758  
129.357  
129.191  
128.755  
127.940  
127.714  
127.451  
125.891  
122.432  
120.132  
116.099  
77.526  
77.208  
76.890

| Parameter                | Value               |
|--------------------------|---------------------|
| 1 Origin                 | Bruker BioSpin GmbH |
| 2 Solvent                | CDCl3               |
| 3 Temperature            | 298.2               |
| 4 Number of Scans        | 20                  |
| 5 Spectrometer Frequency | 100.61              |
| 6 Nucleus                | 13C                 |

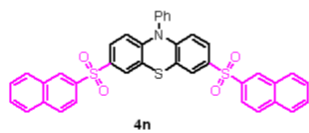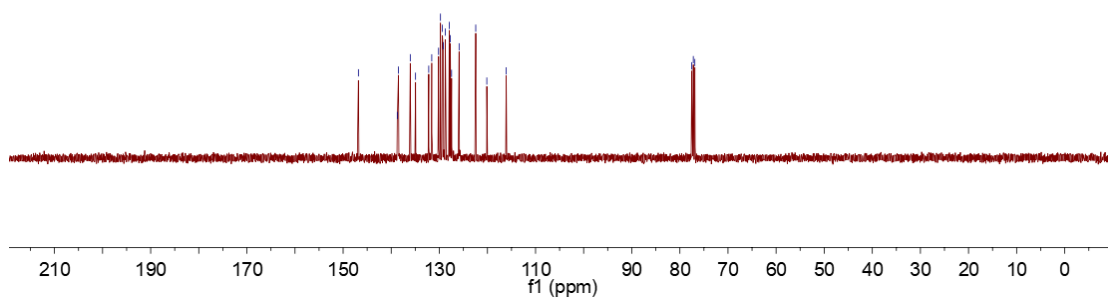

Jul28-2022-c400-lhy-177

8.589  
8.418  
8.398  
8.057  
8.037  
7.879  
7.859  
7.579  
7.560  
7.549  
7.515  
7.437  
7.433  
7.389  
7.367  
6.692  
6.023

| Parameter                | Value               |
|--------------------------|---------------------|
| 1 Origin                 | Bruker BioSpin GmbH |
| 2 Solvent                | CDCl3               |
| 3 Temperature            | 298.2               |
| 4 Number of Scans        | 2                   |
| 5 Spectrometer Frequency | 400.13              |
| 6 Nucleus                | 1H                  |

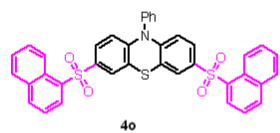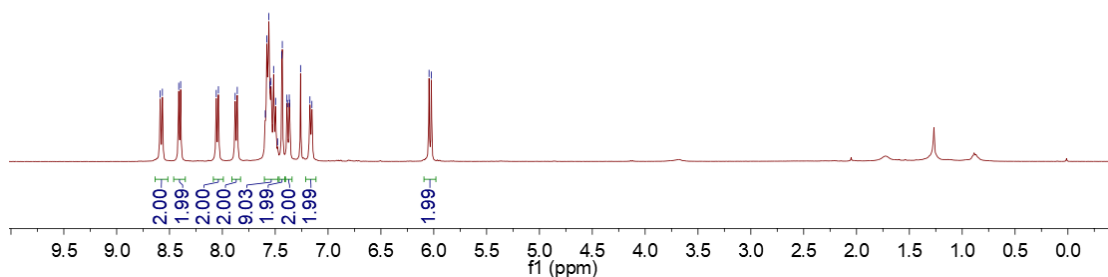

Jul28-2022-h400-lhy-178

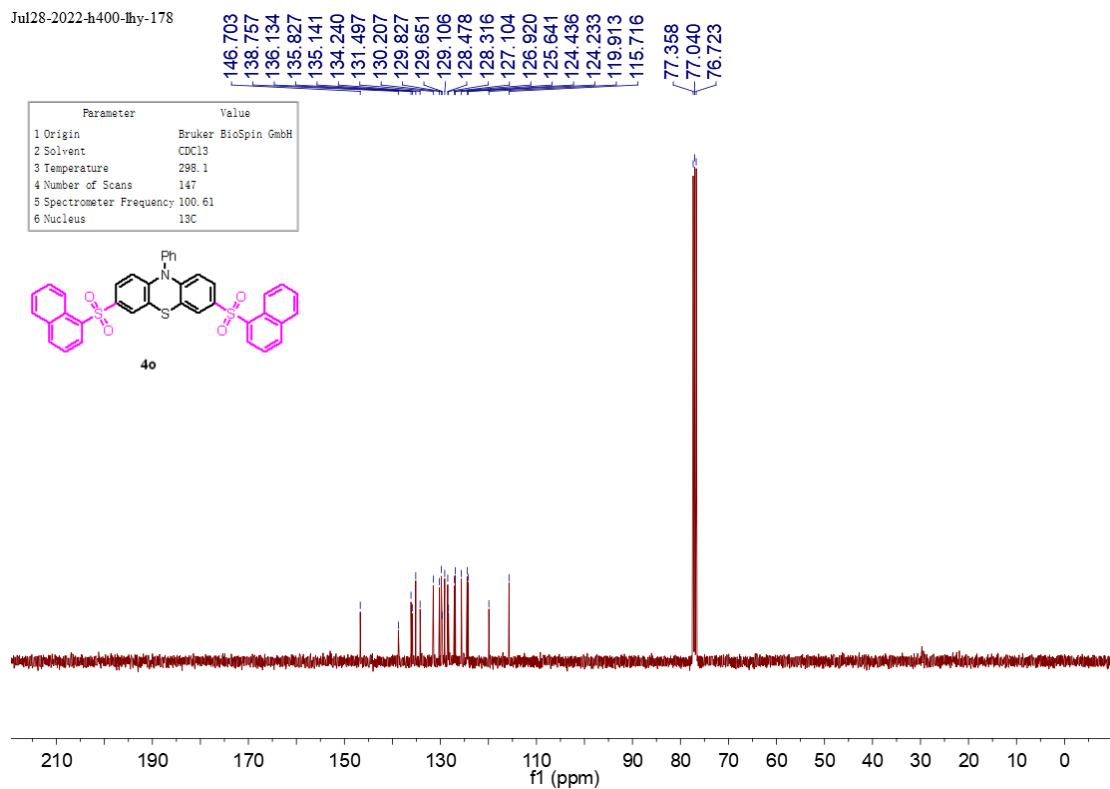

Jul28-2022-h400-lhy-178

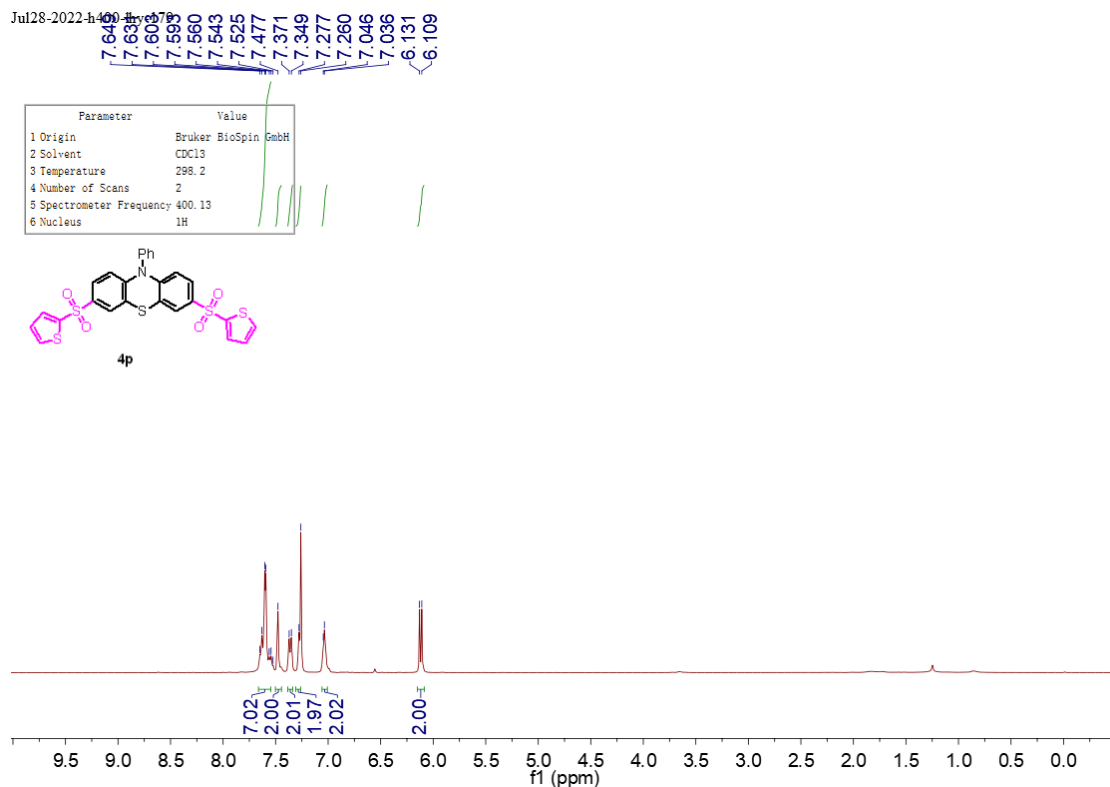

146.920  
143.103  
138.741  
136.435  
133.827  
133.125  
131.651  
130.179  
129.824  
127.962  
127.073  
125.535  
120.070  
116.113

77.476  
77.157  
76.839

| Parameter                | Value               |
|--------------------------|---------------------|
| 1 Origin                 | Bruker BioSpin GmbH |
| 2 Solvent                | CDCl3               |
| 3 Temperature            | 298.3               |
| 4 Number of Scans        | 37                  |
| 5 Spectrometer Frequency | 100.61              |
| 6 Nucleus                | 13C                 |

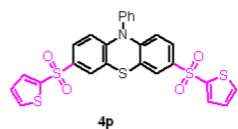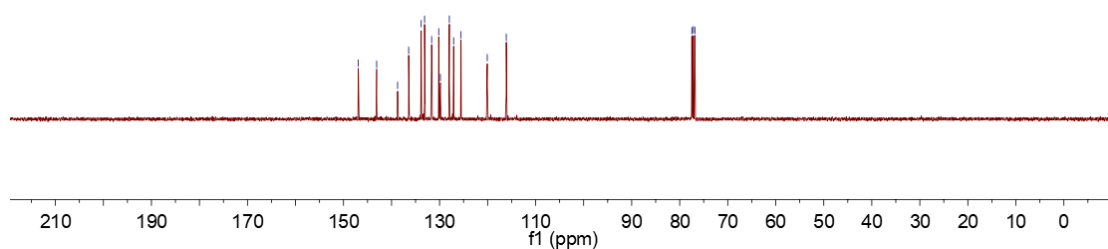

8.048  
7.958  
7.932  
7.733  
7.715  
7.711  
7.677  
7.578  
7.560  
7.448  
7.400  
7.378  
7.348  
7.327  
7.260  
7.240  
6.529  
6.505  
6.124  
6.103

| Parameter                | Value               |
|--------------------------|---------------------|
| 1 Origin                 | Bruker BioSpin GmbH |
| 2 Solvent                | CDCl3               |
| 3 Temperature            | 296.4               |
| 4 Number of Scans        | 2                   |
| 5 Spectrometer Frequency | 400.15              |
| 6 Nucleus                | 1H                  |

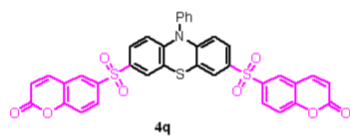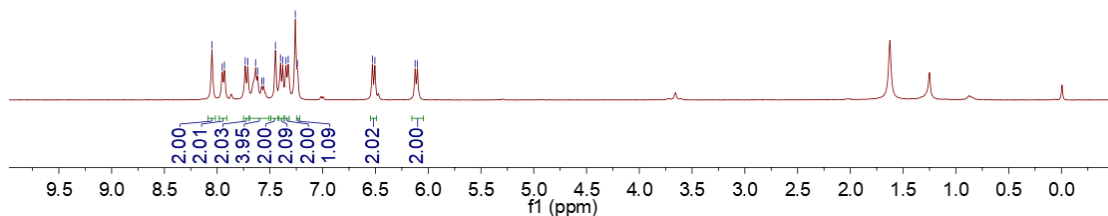

Aug09-2022-C400-KLHY-185

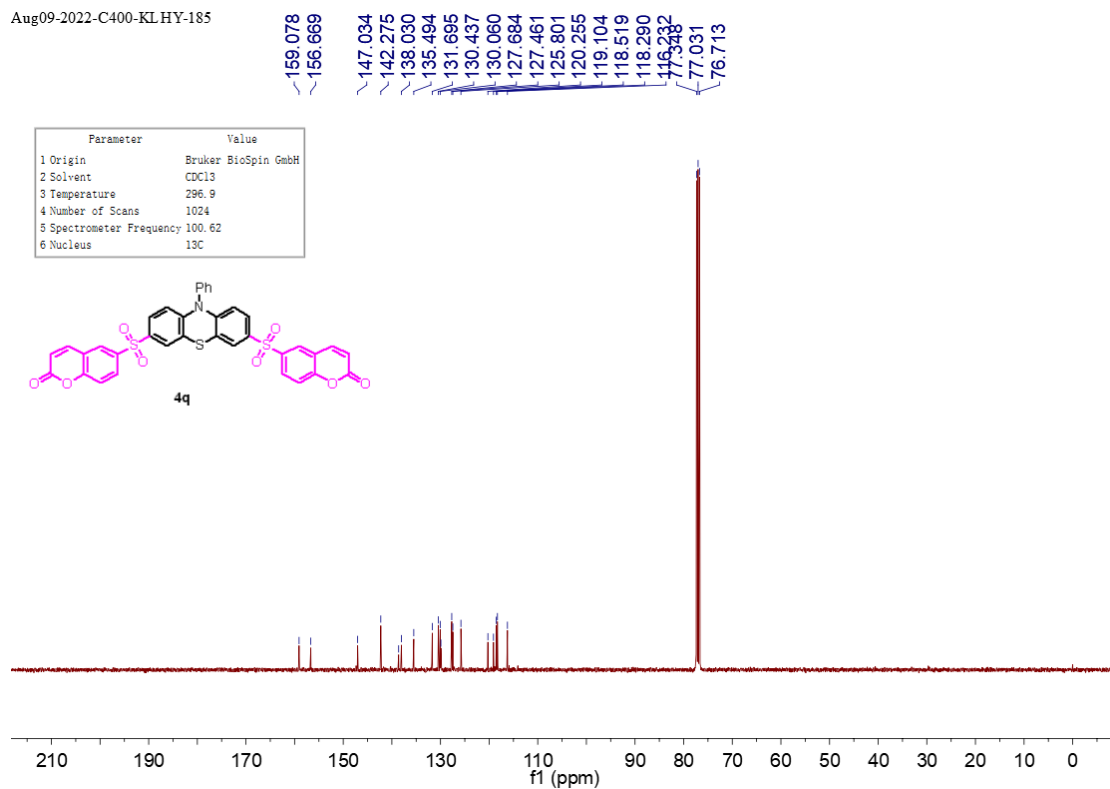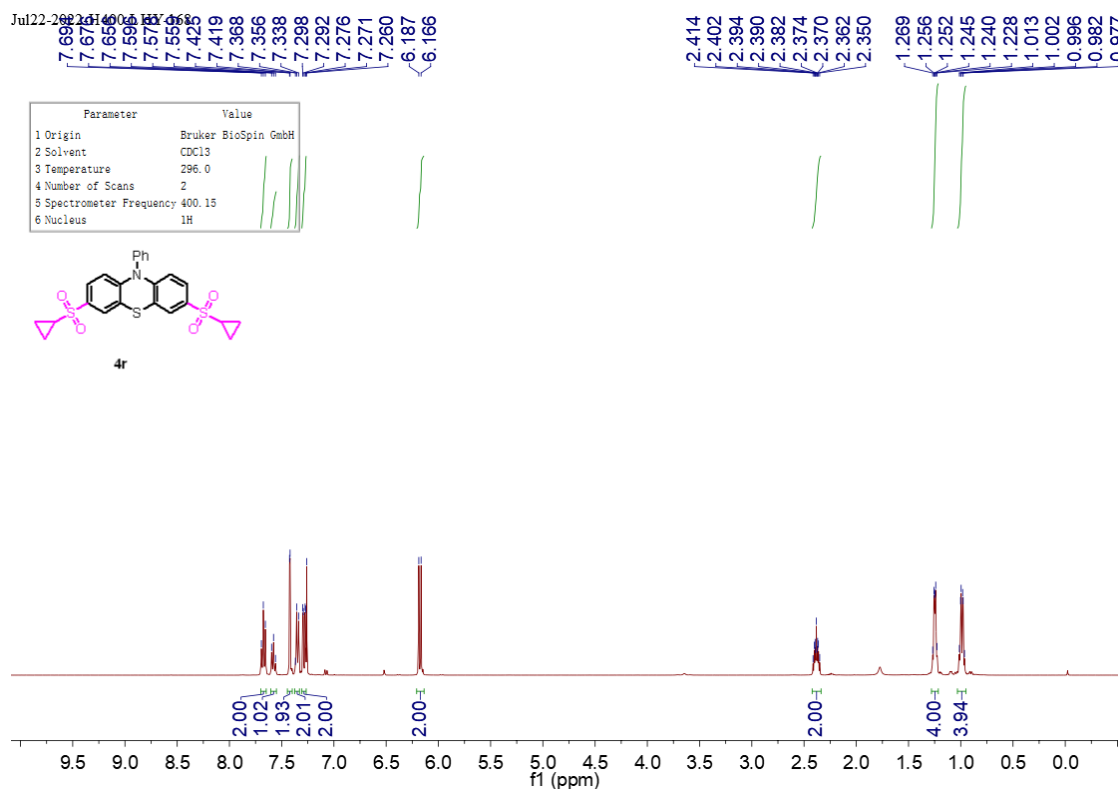

Jul22-2022-C400-hy-168

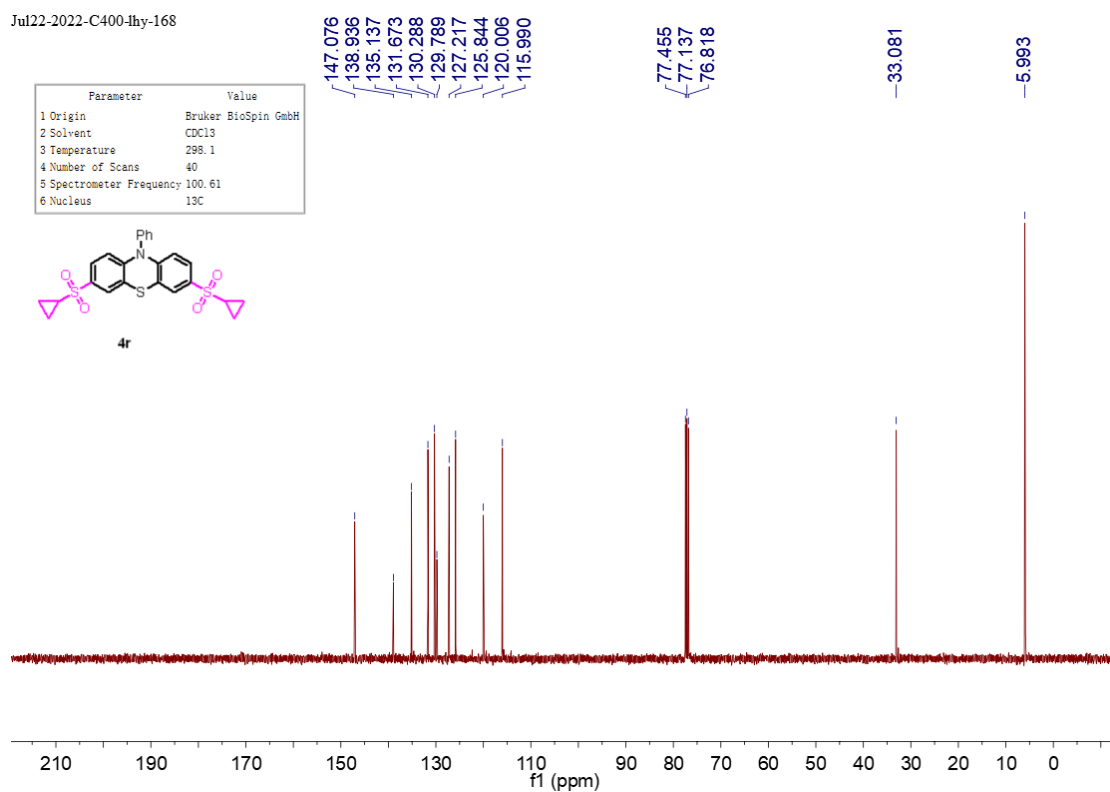

Aug22-2022-H400-hy-206

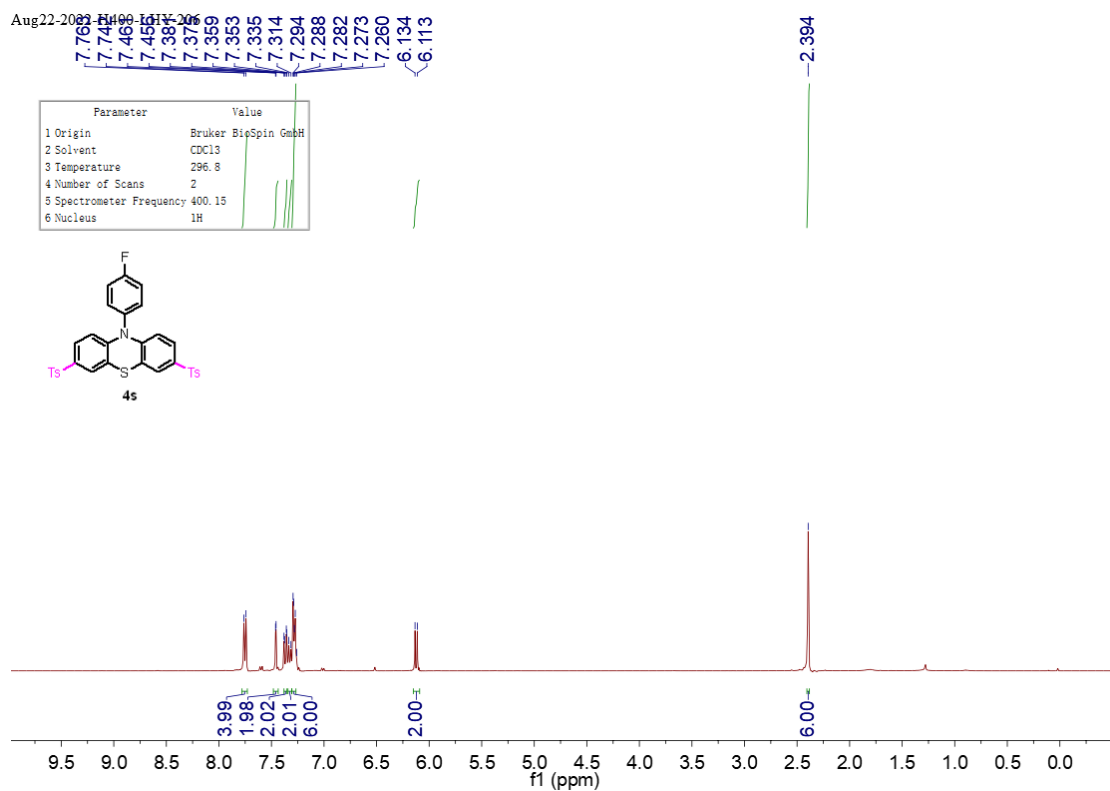



Aug22-2022-h400-lhy-206

163.920  
161.423  
146.681  
144.233  
138.658  
136.605  
134.734  
134.699  
132.312  
132.226  
129.989  
127.437  
127.183  
125.800  
120.278  
118.766  
118.539  
115.939  
77.452  
77.134  
76.816

-21.576

| Parameter                | Value               |
|--------------------------|---------------------|
| 1 Origin                 | Bruker BioSpin GmbH |
| 2 Solvent                | CDCl3               |
| 3 Temperature            | 298.1               |
| 4 Number of Scans        | 49                  |
| 5 Spectrometer Frequency | 100.61              |
| 6 Nucleus                | 13C                 |

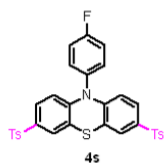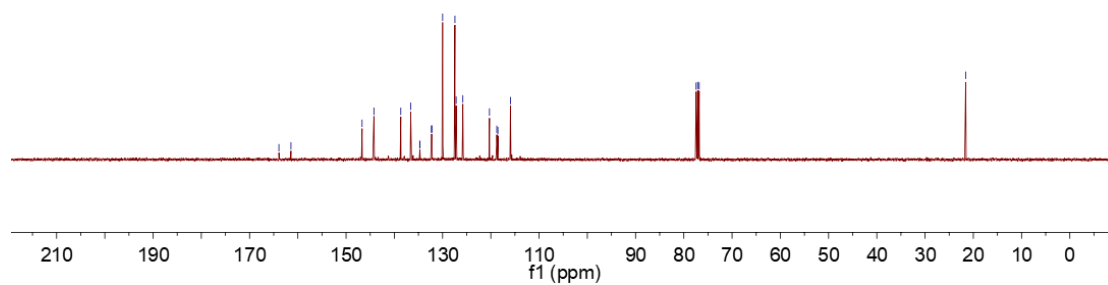

Aug24-2022-F400-LHY-206

| Parameter                | Value               |
|--------------------------|---------------------|
| 1 Origin                 | Bruker BioSpin GmbH |
| 2 Solvent                | CDCl3               |
| 3 Temperature            | 297.2               |
| 4 Number of Scans        | 16                  |
| 5 Spectrometer Frequency | 376.52              |
| 6 Nucleus                | 19F                 |

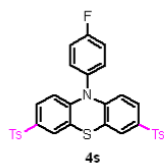

-109.846

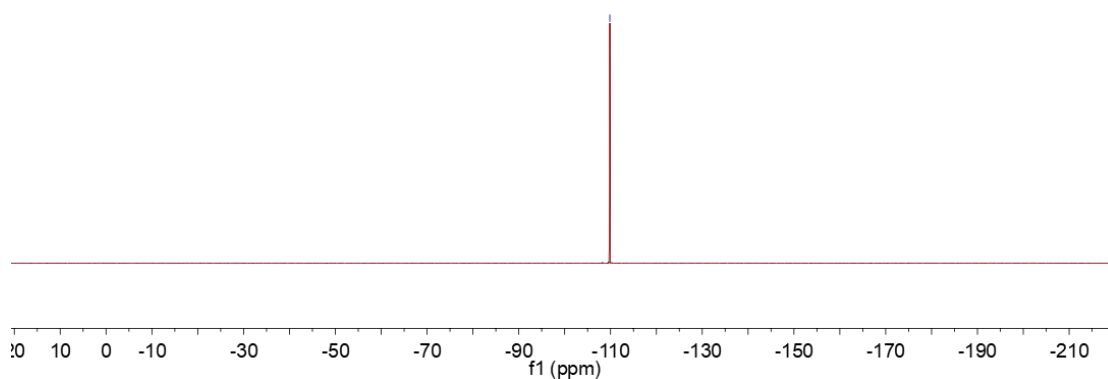

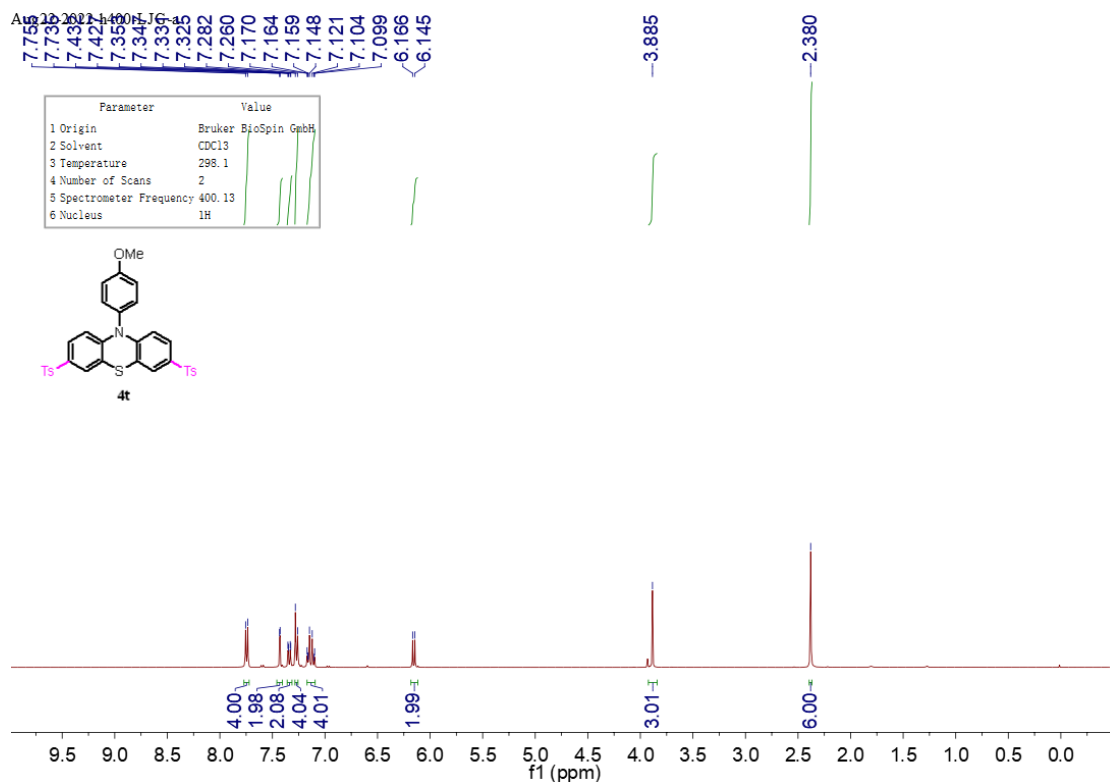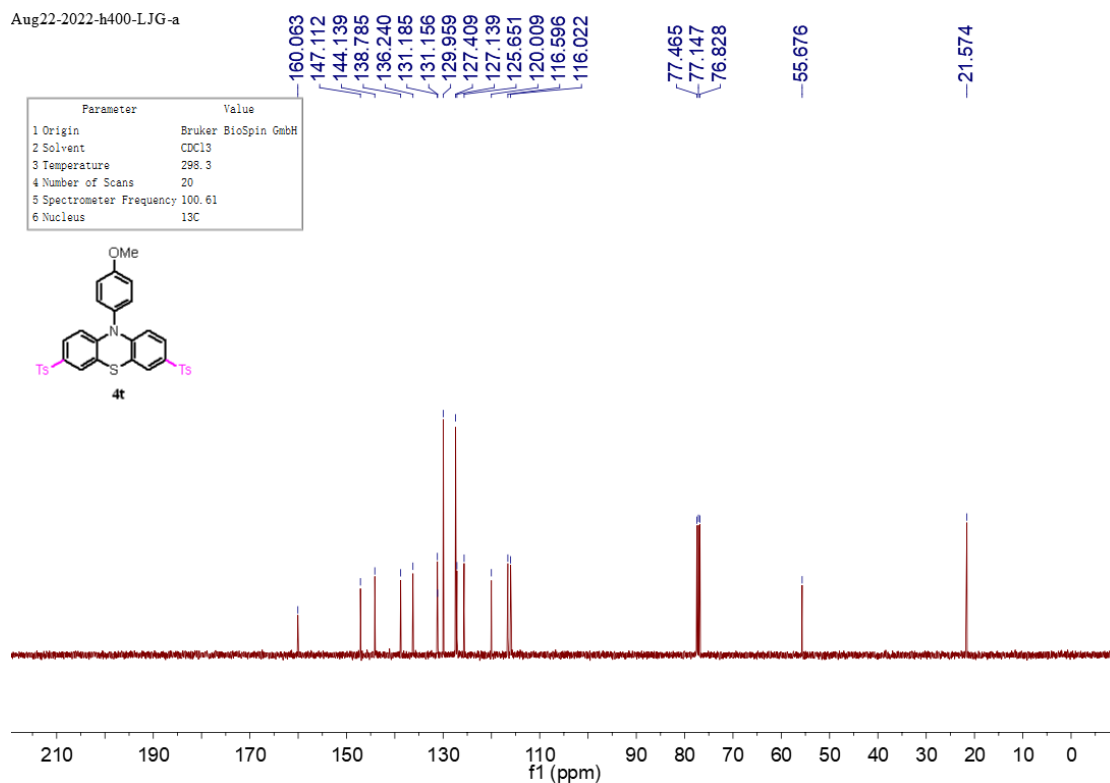

Apr10-2023-WX8-98

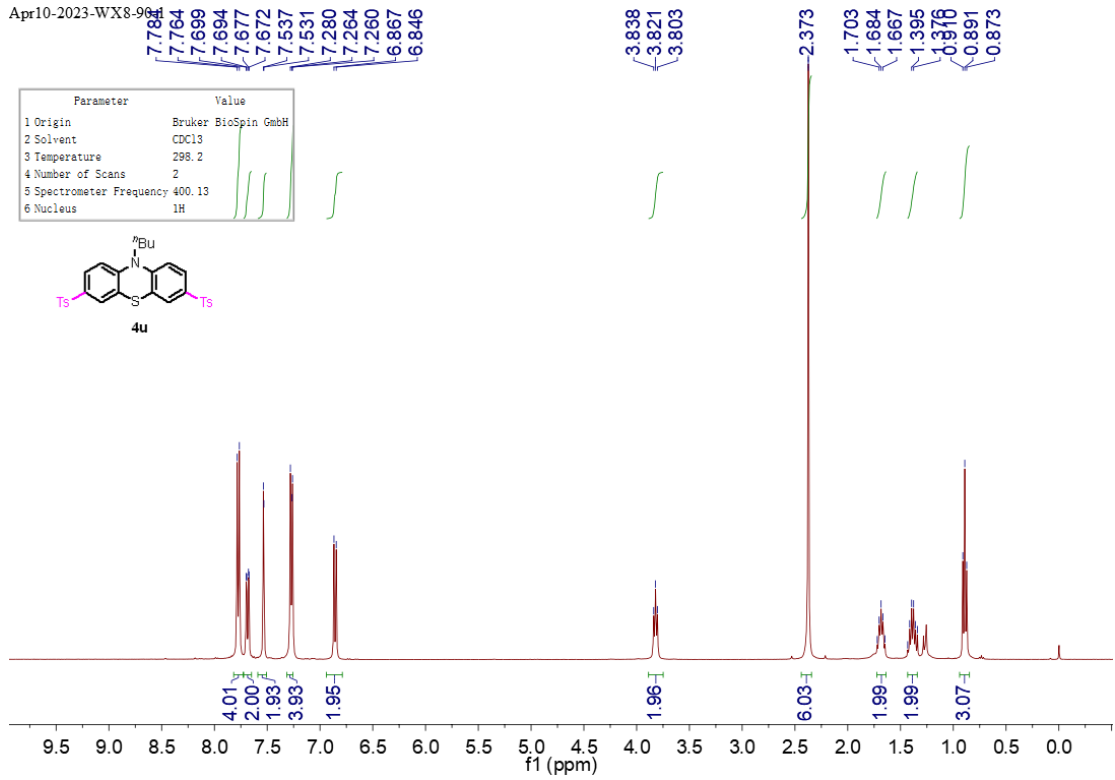

Apr10-2023-WX8-90-1

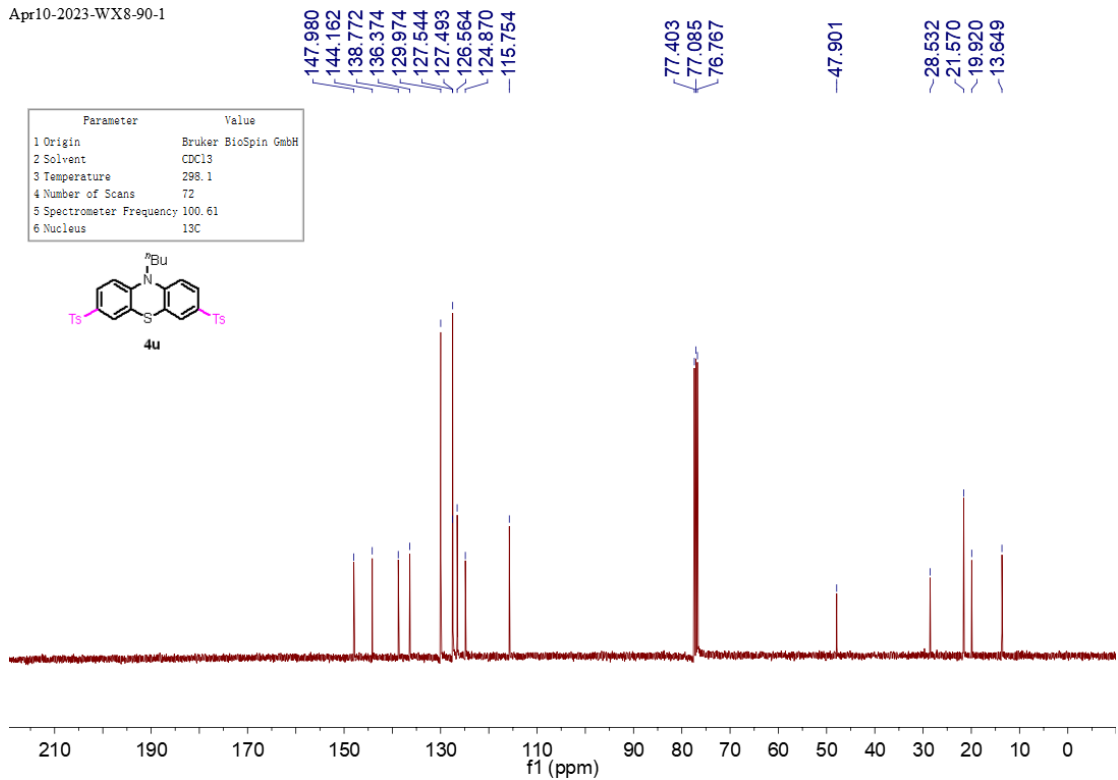

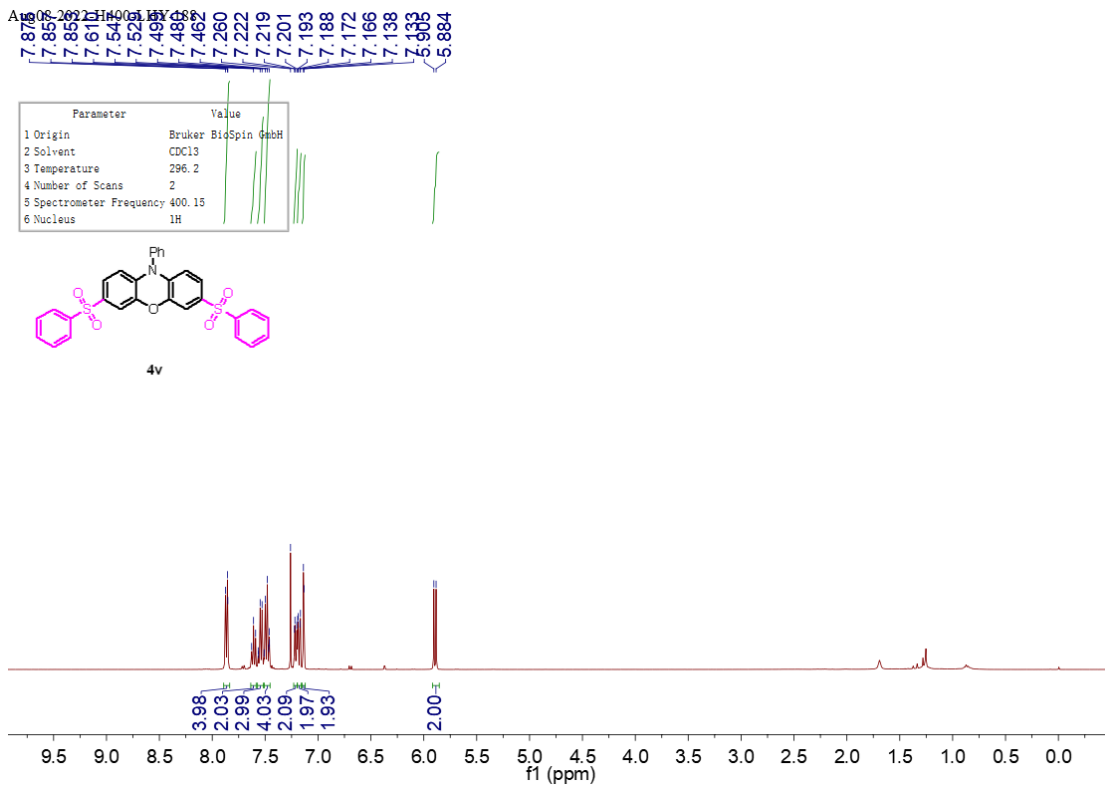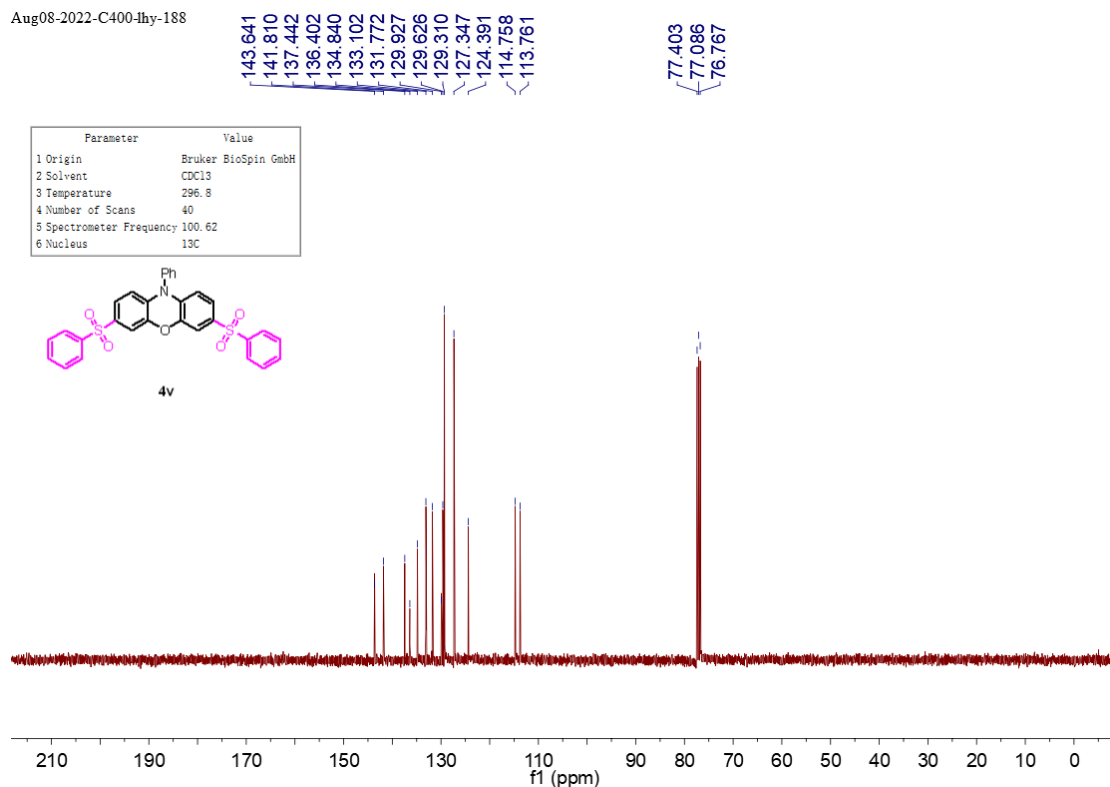

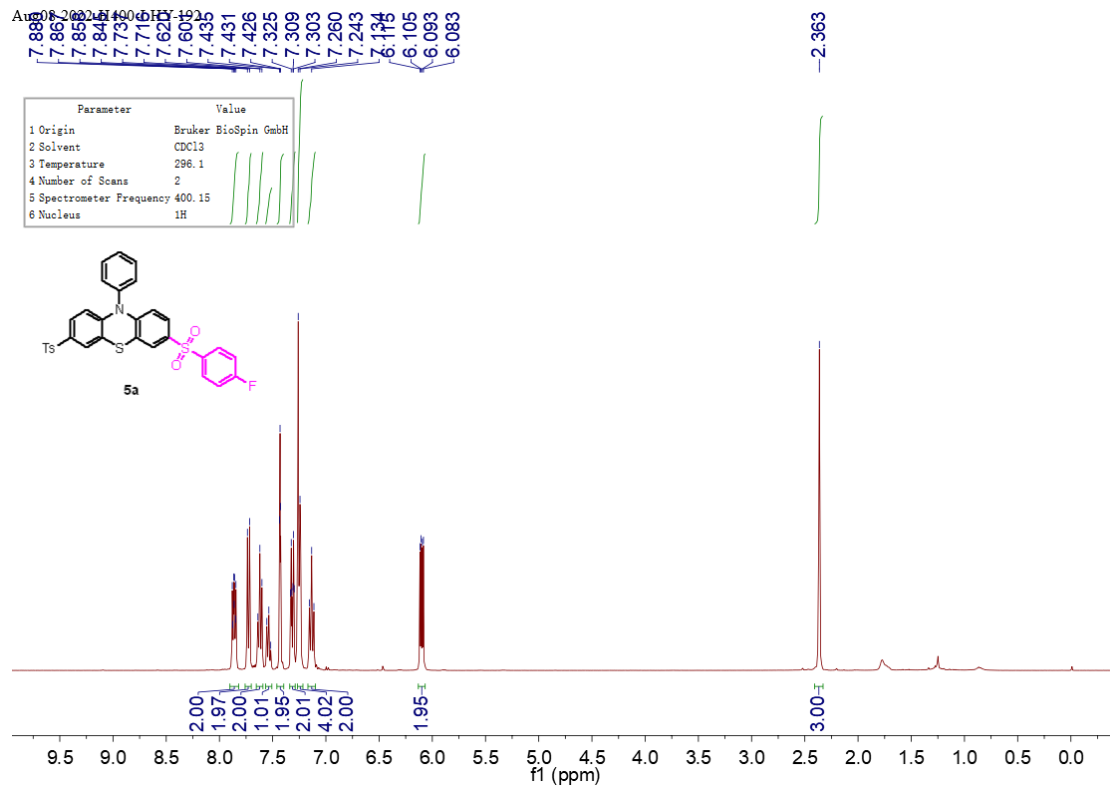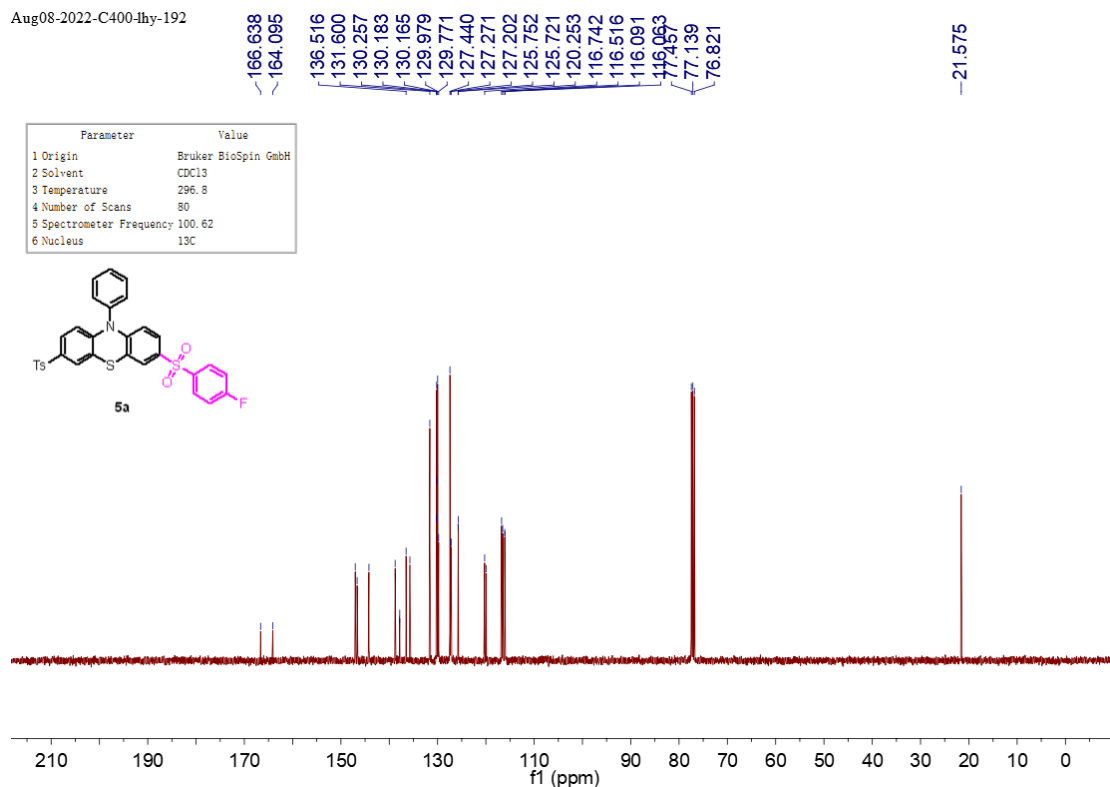

Aug08-2022-F400-LHY-192

| Parameter                | Value               |
|--------------------------|---------------------|
| 1 Origin                 | Bruker BioSpin GmbH |
| 2 Solvent                | CDCl3               |
| 3 Temperature            | 296.2               |
| 4 Number of Scans        | 2                   |
| 5 Spectrometer Frequency | 376.52              |
| 6 Nucleus                | <sup>19</sup> F     |

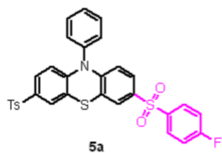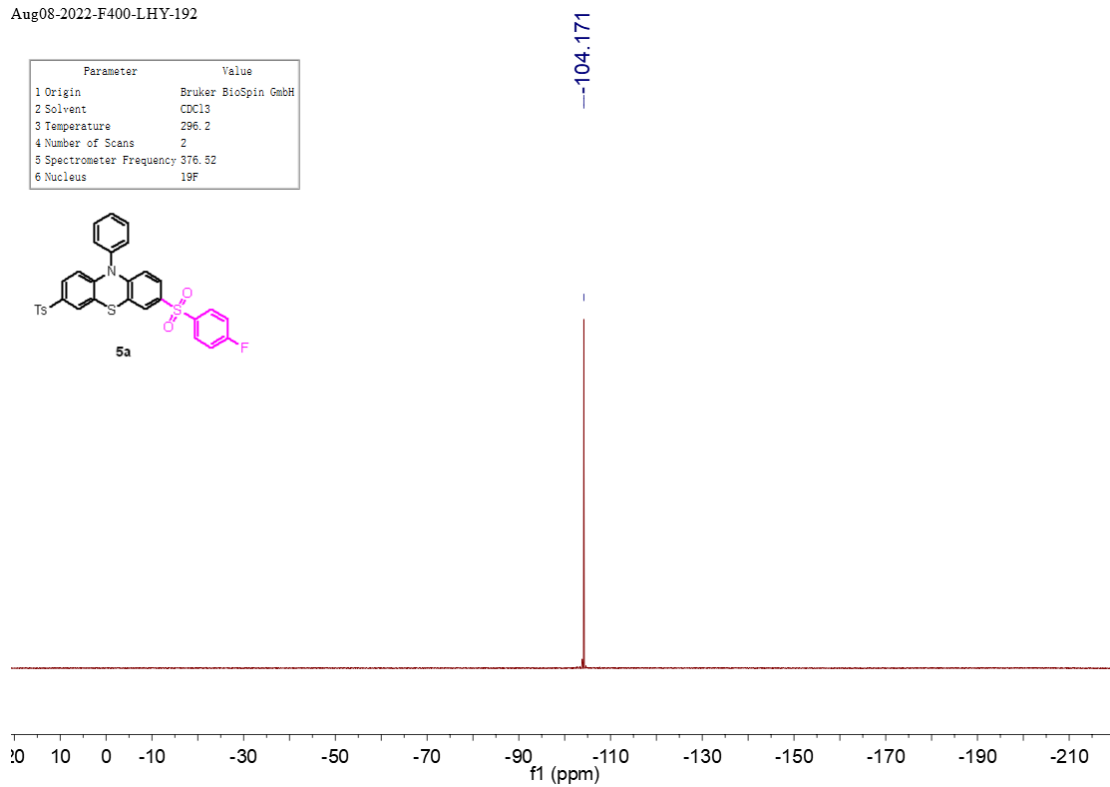

Supplement: d3gc00889d1.pdf [file d3gc00889d1.pdf]
